# Supplementary material for: Diurnal Variations of Human Circulating Cell-Free Micro-RNA
Source: PLoS One. 2016 Aug 5;11(8):e0160577. doi: 10.1371/journal.pone.0160577 (PMC4975411; doi:10.1371/journal.pone.0160577)
Supplement: S2 Table — Row mean normalized data for both miRNA panels. (XLSX) [file pone.0160577.s007.xlsx]

## Sheet: 1st 48 miRs data
Samples	hsa-let-7b-5p	hsa-miR-7-5p	hsa-miR-15b-5p	hsa-miR-16-5p	hsa-miR-17-5p	hsa-miR-19-3p	hsa-miR-20a-5p	hsa-miR-21-5p	hsa-miR-23a-3p	hsa-miR-24-3p	hsa-miR-27a-3p	hsa-miR-28-3p	hsa-miR-29a-3p	hsa-miR-34a-5p	hsa-miR-92a-5p	hsa-miR-100-5p	hsa-miR-106a-5p	hsa-miR-126-3p	hsa-miR-140-5p	hsa-miR-142-3p	hsa-miR-146a-5p	hsa-miR-146b-5p	hsa-miR-150-5p	hsa-miR-155-5p	hsa-miR-181b-5p	hsa-miR-184	hsa-miR-191-5p	hsa-miR-192-5p	hsa-miR-203-3p	hsa-miR-208a-3p	hsa-miR-221-3p	hsa-miR-222-3p	hsa-miR-223-3p	hsa-miR-342-3p	hsa-miR-383-5p	hsa-miR-409-3p	hsa-miR-451a	hsa-miR-590-5p	hsa-miR-638	hsa-miR-708-5p	hsa-miR-29b-3p	hsa-miR-200a-3p	hsa-miR-200b	hsa-miR-15a-5p	hsa-miR-208b-3p	hsa-miR-375
A-1	-2.74726	6.11629	-2.11063	1.87158	0.751391	-2.62691	-0.448498	-0.893821	-4.90006	0.625796	-3.03911	0.993316	-4.6934	5.9792	-0.822181	-3.09488	0.825809	-0.158226	-2.16803	-1.91977	0.752819	-3.35626	-0.0596936	8.45362	-1.74843	6.15995	-0.157815	-5.93734	-1.40701	6.16657	-1.82085	1.53207	3.693	-5.21169	-0.436286	6.673	-0.574847	-2.82691	0.851654	1.71385	-9.85307	-16.1971	-12.4454	-3.07838	-7.06845	#VALUE!
A-2	-2.50881	7.29611	-4.52089	2.66633	0.383771	-2.13036	-0.429743	-1.7819	-6.81324	-0.673972	-4.3075	1.83441	-6.1186	1.37764	-0.566383	-0.159381	0.450478	-0.726375	-2.74009	-2.40155	-0.143705	-4.32985	1.80445	9.91146	-0.063297	7.86546	-1.09157	-4.55839	-1.53893	7.35731	-3.21113	2.38118	2.27852	-6.59047	0.904656	7.6057	0.610185	-2.27011	1.17823	3.77035	#VALUE!	#VALUE!	#VALUE!	-0.55125	-7.00165	-6.13456
A-3	-2.88423	6.45113	-3.13067	2.51341	0.342219	-1.8171	-0.419966	-1.55163	-5.9777	0.0403666	-3.32671	0.832541	-5.25529	6.35428	-0.867574	-0.477598	0.601183	-0.168936	-2.23242	-2.24796	0.650293	-3.68033	0.317297	8.81189	-1.86211	6.60277	-0.850101	-5.59147	-1.8329	6.41371	-2.12151	1.23567	3.28249	-6.02721	-0.032105	6.80124	0.185685	-1.95361	0.602903	2.27004	-11.4295	#VALUE!	#VALUE!	-1.17068	-7.58821	-5.8942
A-4	-2.66704	-5.58459	-2.55098	2.73369	0.858997	-1.49403	0.0483256	-0.709744	-4.08795	0.621376	-2.93327	0.377493	-4.41172	6.69582	-0.502617	-1.14226	1.03949	0.645527	-2.10618	-1.40156	1.05858	-2.92731	0.314784	8.74009	-1.94214	7.04445	0.405875	-6.06413	-1.91587	6.90224	-1.8679	1.28078	4.06331	-5.80391	-0.0639239	7.17073	0.172924	-2.41561	0.883707	1.53455	-9.4861	-19.2411	#VALUE!	-0.670476	-8.02002	-7.01647
A-5	-2.77777	7.73975	-3.46678	2.26957	0.19899	-2.40799	-0.655086	-2.13043	-4.96796	-0.109505	-3.79875	1.41314	-5.85505	7.31642	-1.24488	-1.97192	0.535616	-0.0862493	-2.54896	-2.88728	0.233872	-3.91227	0.348997	8.89266	-1.49007	7.72366	-0.558551	-6.08054	-2.64306	7.4624	-2.80912	1.99653	3.1587	-6.17919	0.500964	8.04724	-0.266487	-2.22854	0.686713	2.55123	#VALUE!	#VALUE!	-11.7234	-3.20478	#VALUE!	-6.17945
A-6	-3.6686	7.52101	-3.21829	2.05274	0.0828011	-2.04993	-0.313447	-2.03042	-6.03648	-0.0517413	-4.01754	1.11005	-5.81788	7.11672	-1.13965	-0.191362	0.309593	-0.408338	-2.5973	-2.39605	0.323046	-3.89799	0.600283	9.26537	-1.78647	7.41278	-0.433906	-4.67959	-2.29139	7.5597	-2.55986	1.79538	3.18642	-6.5863	0.441444	7.9239	-0.516999	-3.09423	0.810076	2.27243	#VALUE!	-18.5037	-12.8532	-1.13893	-7.90058	-5.00308
A-7	-2.6973	7.62926	-3.48964	2.41401	0.368831	-1.9373	-0.279819	-1.63059	-4.82935	0.0497249	-3.63722	1.20472	-5.43603	2.35706	-1.00872	-1.4347	0.318405	0.168032	-2.847	-2.08216	0.657166	-3.50936	0.130476	9.96024	-1.91955	7.68136	-0.302394	-5.90767	-2.66238	7.90274	-2.21445	1.86763	3.61499	-6.36184	0.256512	8.56529	-0.242995	-3.24129	0.170379	2.35494	#VALUE!	#VALUE!	#VALUE!	-2.72473	#VALUE!	-5.46618
A-8	-1.749	-4.21305	-2.39401	3.2685	1.09952	-0.79896	0.479802	-0.621108	-4.99936	0.976511	-2.64455	0.959124	-4.6689	-4.8126	-0.286239	-7.00542	1.1892	0.942671	-1.84224	-1.25442	1.38304	-2.6131	0.438263	9.82041	-1.71715	7.92919	0.588277	-5.02787	-1.43444	8.25735	-1.46219	2.27155	4.38439	-6.10813	1.03112	8.53731	0.8792	-2.3511	1.19127	2.37714	#VALUE!	#VALUE!	#VALUE!	-2.53739	-7.27573	-6.05325
A-9	-1.986	7.4564	-4.44343	3.4076	0.352288	-1.28485	-0.191771	-1.28071	-6.10044	-0.282582	-3.70108	1.56622	-4.60183	-1.2978	-0.524	-2.11407	0.418655	-0.514388	-2.70506	-2.68302	0.0968717	-3.77436	0.735793	9.55677	-0.715569	7.44602	-1.14099	-5.71168	-2.08529	7.83742	-2.99242	1.94095	3.6174	-4.81905	0.980723	8.48689	1.00176	-3.09664	0.841737	2.30355	#VALUE!	#VALUE!	#VALUE!	-1.9563	-5.50148	-9.49364
B-1	-3.86928	7.17374	-2.95174	2.11666	0.360061	-1.18419	-0.0158947	-1.53018	-4.8514	0.193765	-3.52441	0.266962	-5.03982	6.01722	-1.04069	-0.125971	0.590307	0.222724	-2.16702	-1.94094	0.771041	-3.28861	-0.592462	8.89153	-2.27292	6.68459	-0.498469	-5.38388	-1.4007	6.64514	-2.88206	0.93998	3.49196	-6.07304	0.286407	7.16676	-0.34956	-2.16013	0.268966	1.05554	-11.8258	#VALUE!	-12.7079	-0.952348	-4.59788	-6.69855
B-2	-3.68999	6.87527	-2.99684	1.9651	0.389029	-1.49157	0.0279178	-1.95423	-6.02035	-0.0979623	-3.72994	0.938503	-5.28761	6.55978	-1.11301	0.514453	0.681697	0.096719	-2.51336	-1.81621	0.575525	-3.3912	0.463837	8.68046	-1.65104	6.90935	-0.201867	-5.18453	-2.01648	6.85521	-3.13741	1.14602	3.4674	-6.11454	0.534312	6.68893	-0.58318	-2.05149	0.0889269	1.58438	-10.3552	#VALUE!	#VALUE!	-1.07066	-4.69395	-6.108
B-3	-3.30933	7.25322	-2.80031	2.3276	0.367167	-1.26608	-0.0914283	-1.96816	-6.00204	-0.107094	-3.96317	0.425303	-5.07181	6.67526	-0.945482	0.775385	0.405036	0.0540078	-2.69562	-1.61772	0.37288	-3.65585	0.0286327	9.12302	-2.30307	7.05307	-0.485626	-4.99693	-1.94485	6.79016	-3.18461	0.988189	3.17801	-5.98135	0.596083	7.23068	-0.115323	-2.73586	0.046638	1.55137	#VALUE!	-13.8821	#VALUE!	-0.744496	-9.59812	-6.06131
B-4	-3.3229	-4.17916	-2.22505	2.71483	0.923354	-0.991034	0.621006	-1.41296	-5.08195	0.525519	-3.30139	0.0384945	-4.58662	6.65277	-0.653203	0.561991	1.15246	0.769239	-1.82183	-1.17167	1.03685	-2.77582	-0.0523271	8.65694	-2.17091	6.71452	0.603856	-5.93415	-1.63456	6.78936	-2.4014	0.959693	3.93976	-5.32967	0.155483	6.55572	-0.150348	-1.89314	0.272738	1.44553	#VALUE!	-13.3851	-10.4712	-0.941277	-4.61743	-5.34457
B-5	-3.15726	6.98846	-2.88291	2.08809	0.422048	-1.23355	-0.046213	-1.68443	-4.80288	-0.00385517	-3.50131	0.413773	-5.03989	6.87219	-1.03439	-0.587761	0.58639	0.34452	-2.12375	-1.73339	0.661056	-3.14378	-0.50213	8.2934	-2.48038	6.93069	0.159857	-5.27338	-2.47686	6.91267	-3.08362	0.9156	3.67738	-6.31378	0.560521	6.99726	-0.829785	-2.27838	-0.0931588	1.48295	-11.6089	#VALUE!	-12.0709	-1.57029	-13.1016	-6.0941
B-6	-2.76336	-3.70752	-2.26767	3.23757	0.587554	-0.599518	0.563493	-0.949453	-4.65841	-0.431424	-3.39311	0.539339	-4.86118	6.58936	-0.0255789	0.25268	0.853278	0.522222	-2.03684	-1.02603	0.556093	-3.12057	-0.739861	7.32498	-4.26108	7.09992	-0.239858	-4.45949	-0.852014	6.80618	-2.62116	0.610792	3.62409	-4.85028	1.0015	6.79479	0.708503	-1.90757	0.316511	1.78313	#VALUE!	-13.9702	-11.2158	-0.872581	-5.10081	-5.01918
B-7	-3.91574	-2.92022	-2.5498	2.57189	0.558789	-1.40054	0.113123	-1.85347	-4.96516	-0.147646	-3.99579	1.30125	-5.83947	7.32165	-0.747474	0.52178	0.696484	0.40263	-2.2884	-1.47519	0.558505	-3.58978	0.736812	9.32313	-1.2961	7.56964	0.320206	-5.49126	-2.31261	7.65789	-3.12339	1.57054	3.42439	-5.84003	0.934949	8.06559	-0.299117	-2.42838	0.706811	2.1235	-11.2337	-19.6861	#VALUE!	-0.67643	-5.56942	-6.38038
B-8	-3.35766	6.81471	-2.40486	1.91777	0.505993	-1.2341	0.038536	-1.73413	-4.8689	0.374488	-2.96755	0.48905	-5.23534	1.23406	-1.12019	0.221045	0.704444	0.605318	-1.91743	-1.11507	0.884998	-3.11061	-0.192916	8.82948	-1.38313	6.49256	0.487373	-6.5415	-1.68977	6.56418	-2.47513	0.812283	4.17341	-5.59711	0.154785	6.87085	-1.17339	-1.8923	0.236213	1.59955	-13.8775	#VALUE!	-10.1162	-0.706005	-10.9375	-6.70826
B-9	-3.19614	6.15652	-2.56448	2.43696	0.385727	-1.06129	-0.0847593	-1.27516	-4.83554	0.286684	-3.37779	-0.0186253	-3.498	5.87758	-1.61116	-1.88968	0.560584	0.277155	-1.83616	-1.54744	0.783708	-2.9337	0.397609	7.76775	-0.158512	5.77995	-0.0360882	-6.26985	-2.21994	6.17416	-2.9066	0.668922	4.32831	-3.61465	-0.733931	6.3714	-0.62309	-2.05239	-0.461772	0.553717	-13.1083	-18.0891	-8.81289	-1.72705	#VALUE!	-7.75806
C-1	-3.4098	-6.41484	-2.46887	2.35475	0.898323	-0.956157	0.408445	-0.491631	-4.47641	0.684614	-3.48785	1.1937	-4.61747	6.60447	-0.559666	0.0211218	1.06286	0.272901	-1.85585	-1.33388	0.879291	-2.94746	0.00966361	8.42596	-1.60441	6.67643	0.032101	-4.82933	-1.16492	6.8865	-2.01554	1.17303	3.61188	-5.93819	0.401442	7.16712	-0.179447	-2.07276	0.352501	1.70734	#VALUE!	#VALUE!	-11.1809	-0.696854	-4.46908	-8.37939
C-2	-3.1654	-6.403	-2.00523	2.57843	0.92432	-0.76641	0.527688	-0.82362	-4.34672	0.925124	-3.00622	0.215231	-4.94954	6.64525	-0.572238	-0.406569	1.07288	0.80827	-1.61748	-1.2188	0.996641	-2.80564	-0.107269	8.55683	-1.83145	6.45057	0.892203	-5.8787	-1.44587	7.38726	-1.93534	1.09495	4.12374	-6.66491	0.581682	6.97842	-0.427804	-1.8132	0.489226	0.94271	#VALUE!	#VALUE!	-11.8196	-0.776958	-7.06589	-7.34729
C-3	-2.95421	-15.0858	-1.71934	2.53127	0.904377	-0.940903	0.478398	-0.693566	-4.60324	0.806335	-3.20548	0.63264	-5.47749	7.29979	-0.278236	1.1716	1.20557	0.57516	-1.73915	-1.23086	0.998601	-2.75655	0.489277	9.26434	-1.85065	7.23987	0.475602	-3.85634	-1.03704	7.48605	-1.73315	1.30746	3.76785	-6.136	0.860838	7.42609	0.0566357	-1.81449	0.458083	1.67671	-9.45007	-13.7478	#VALUE!	0.0414398	-4.41542	-6.76613
C-4	-3.39164	6.57457	-2.03749	2.05289	0.644332	-1.21035	0.11326	-0.895632	-4.76987	0.490392	-3.20511	-0.366328	-5.5853	6.08838	-0.986325	-0.68592	0.884151	0.472355	-1.87201	-1.49161	0.6968	-3.11214	-0.344245	8.21754	-2.38511	6.03914	0.471435	-4.89094	-1.46999	6.50927	-2.09103	0.661541	3.86634	-6.82616	-0.158266	6.47675	-1.21621	-1.66147	-0.0273795	0.421367	#VALUE!	#VALUE!	-11.2819	-0.979701	#VALUE!	-6.36427
C-5	-3.24414	6.80061	-2.59169	1.71215	0.50614	-1.60479	-0.0709709	-1.29679	-4.79308	0.315242	-3.34165	0.377642	-5.19124	6.64431	-1.35556	-0.188486	0.659356	0.201615	-2.20426	-1.77916	0.62984	-3.07578	-0.251585	8.55696	-2.01147	6.37068	0.564846	-4.77643	-2.06658	6.8348	-2.44082	0.916898	3.65566	-6.93959	-0.0419086	7.09077	-1.67336	-1.75592	-0.194251	1.05203	-11.5904	#VALUE!	-9.68932	-0.750376	-7.99859	-5.47295
C-6	-3.43854	-4.25668	-2.09407	2.28395	0.581639	-1.21289	0.137793	-0.516632	-4.33185	0.149752	-3.30462	0.96273	-5.37825	6.74765	-0.458239	0.534715	0.658493	0.2009	-2.0955	-1.70418	0.838244	-3.04791	0.394889	8.66027	-2.20505	7.01472	0.0548133	-5.00918	-1.386	6.83732	-2.00476	1.13944	3.53085	-6.46067	0.70248	7.37474	-0.947579	-1.79355	0.226292	2.61446	-12.4852	-15.4615	-12.6675	-0.481463	-5.38539	-4.58075
C-7	-3.07613	7.21595	-3.08154	2.25958	0.581904	-1.49435	-0.217729	-1.77816	-5.43658	0.0925689	-3.51611	0.878959	-5.71997	4.1823	-1.15538	0.403975	0.74499	0.112257	-2.37706	-1.97853	0.630059	-3.62364	0.164031	9.3578	-1.93252	7.01438	-0.0187049	-5.76156	-2.37773	7.30546	-2.6089	1.38248	3.3399	-6.87665	0.491235	7.50356	-0.943155	-2.35123	0.422347	2.2419	#VALUE!	#VALUE!	#VALUE!	-2.45038	-6.0479	-5.07686
C-8	-3.51349	6.98159	-2.49201	1.90704	0.762106	-1.46353	-0.00462622	-1.22402	-5.34347	0.517346	-3.32343	0.246159	-5.63643	2.85448	-1.18688	0.133303	0.8385	0.271317	-2.009	-1.44972	0.813894	-3.26252	0.202132	8.53946	-2.15039	6.96693	0.439074	-5.79525	-1.55333	7.18777	-2.15821	1.16264	3.81609	-6.89842	0.169369	7.08091	-1.33531	-2.07359	0.323871	1.65966	#VALUE!	#VALUE!	-9.0575	-0.481686	-8.73262	-5.57349
C-9	-2.50202	6.74162	-2.33769	2.21377	0.833207	-0.808785	0.0166317	-1.08821	-4.51963	0.833944	-2.95073	0.00130054	-5.57142	-1.06472	-0.882135	-1.44364	0.996524	0.699831	-1.86686	-1.56895	1.16546	-2.92383	-0.107249	8.72621	-1.99893	6.67621	0.688477	-6.46863	-1.05607	7.2616	-1.81348	1.16899	4.1127	-6.77656	0.235964	7.17871	-1.36848	-1.64004	0.265741	0.941159	-10.9655	#VALUE!	-9.18737	-1.68392	-11.9505	-7.07227
D-1	-3.45207	6.30504	-2.6949	1.855	0.631897	-1.86446	0.212222	-1.30589	-6.44081	0.225125	-3.87684	0.774937	-4.87044	6.19487	-0.865364	-0.197926	0.652749	0.266395	-2.87369	-1.41367	0.844834	-3.22992	0.0721582	8.68066	-1.38334	6.6904	-0.662667	-4.66658	-1.84385	6.58992	-2.20337	0.855529	3.5764	-6.27578	-0.293157	6.36921	-0.66535	-1.75039	0.596404	1.43671	#VALUE!	#VALUE!	-11.2493	-0.658315	-3.68117	-8.05922
D-2	-3.65427	-17.8639	-3.09875	2.76707	1.45268	-1.12729	0.659324	-1.36165	-5.82183	0.871328	-3.07746	1.6851	-4.74237	7.61418	-0.556469	1.29851	1.39244	0.782686	-2.44919	-1.35936	1.57852	-2.92322	1.29835	9.55811	-0.0422975	7.89068	-0.0768232	-4.48015	-1.47224	8.02416	-2.1783	1.81031	4.05603	-6.36338	0.572183	6.99872	-0.0492857	-1.06654	1.04522	2.40915	-12.3307	#VALUE!	-7.38608	0.509967	-6.19388	-5.98577
D-3	-3.40551	6.17759	-3.05584	2.14172	0.667924	-1.4177	-0.0289955	-1.57057	-6.62137	0.540639	-3.825	0.380509	-5.71962	6.4162	-1.00218	0.444299	0.910886	0.373781	-2.71249	-2.02836	0.923686	-3.03983	0.259075	8.61596	-1.30535	6.82941	-0.890516	-5.40583	-0.78465	7.00926	-1.99729	0.805047	3.42488	-6.78884	0.258307	6.67082	-0.599495	-2.06552	0.249357	1.1656	-14.3315	#VALUE!	-9.89888	-0.296827	-6.27841	-6.50827
D-4	-2.73867	6.31444	-2.37102	2.84943	0.762159	-1.39741	0.484999	-1.59775	-5.82982	0.480275	-3.66726	0.218235	-5.34191	6.43778	-0.597483	-7.03408	1.01449	0.525148	-2.6088	-1.44853	0.89315	-3.09513	0.440754	8.36529	-1.26303	6.54531	-0.235734	-4.78846	-1.5217	6.65486	-2.14607	0.821996	3.64047	-6.28783	0.194957	7.12554	0.202016	-2.07638	0.523549	1.5522	#VALUE!	#VALUE!	-9.87098	0.175191	-6.19381	-5.52547
D-5	-3.97367	7.12381	-3.21154	2.31883	0.740565	-1.66692	-0.06173	-1.72186	-5.44645	0.240169	-3.702	0.0535882	-5.51104	6.68249	-0.91502	0.653959	1.01723	0.364297	-3.34866	-1.69597	0.908165	-3.11492	0.37309	8.5611	-1.30068	6.86308	-0.237513	-5.38526	-2.94536	6.9426	-2.35284	0.947699	3.50501	-6.53451	0.218581	6.73956	-0.59879	-2.29266	0.139604	1.62396	-12.6017	#VALUE!	#VALUE!	-1.92253	-7.41697	-6.24899
D-6	-2.61066	-15.8714	-1.66716	3.31286	1.61069	-1.27694	0.758864	-0.795411	-4.3704	1.10784	-2.66429	0.923128	-4.20018	2.99531	-0.0515123	-6.91316	1.72565	1.32626	-2.26271	-0.499196	1.87763	-2.45652	1.2015	9.5823	-0.441114	7.40347	0.892105	-4.31063	-2.40183	7.5163	-1.16274	1.73841	4.73478	-5.4063	0.537546	7.56295	0.0926021	-1.16144	0.861625	2.76174	#VALUE!	-17.3401	-8.15906	-0.569645	-7.81069	-4.81856
D-7	-3.39321	7.20769	-3.71501	2.93251	0.875725	-1.64498	0.427787	-1.71363	-5.74914	0.507918	-3.53789	0.22647	-5.10086	1.80229	-0.464858	-3.37343	1.31096	0.607725	-3.71024	-1.3955	1.30111	-2.96583	0.662693	9.35478	-0.774347	7.35787	-0.410159	-5.10127	-1.50724	7.58518	-2.63407	1.09003	3.87838	-6.62243	-0.339229	7.16023	-0.105972	-2.57112	0.899411	1.64166	-11.5939	#VALUE!	#VALUE!	-1.67742	-5.0778	-6.02521
D-8	-2.49882	-5.30778	-2.38921	3.47437	1.48263	-0.779421	0.92062	-0.678166	-4.8333	1.46441	-2.64833	-0.969282	-4.95647	0.728191	0.117388	-12.3412	1.69495	1.49568	-1.89078	-0.832657	1.94723	-2.23897	1.16946	9.0332	-0.902971	7.18949	1.01544	-5.50725	-1.41225	10.6389	-1.39718	1.46402	4.75122	-5.51813	0.204123	7.58411	0.237763	-2.29576	1.24393	1.54079	-9.14588	#VALUE!	-10.372	-1.42941	-5.93904	-4.9693
D-9	-2.73172	7.27139	-2.60547	2.76364	1.23737	-1.19386	0.737692	-0.762677	-5.20351	1.26796	-2.70216	-0.144307	-4.93832	-2.20386	-0.216036	-13.3337	1.62681	1.47838	-1.97595	-1.08868	1.62245	-1.97891	0.660701	9.19538	-0.806364	6.92091	0.621573	-6.43934	-1.75138	8.07739	-1.31437	1.1284	4.71043	-6.22449	-0.250585	9.43376	-0.435442	-2.22658	0.736595	1.03694	#VALUE!	#VALUE!	-8.49402	-0.923476	-6.47706	-5.22365
E-1	-2.7252	-14.4044	-2.69641	2.66327	1.27349	-1.29932	0.856119	-1.53327	-5.0566	0.920077	-3.39713	0.738293	-4.43388	6.94865	-0.484394	0.594568	1.41513	0.710865	-2.22317	-1.03224	1.32267	-2.70447	0.626828	8.53747	-0.874148	7.00865	0.0655471	-3.78702	-0.590013	7.37293	-2.12324	1.35288	4.20856	-6.26281	0.385515	7.44454	0.0200777	-1.66053	1.08418	1.73798	-13.3127	#VALUE!	-9.68032	0.520851	#VALUE!	-6.24943
E-2	-3.8941	6.89522	-4.30689	2.24744	1.01185	-1.89971	0.12309	-2.25344	-4.99916	0.103492	-4.09639	0.535065	-5.58802	6.84064	-1.32404	0.851561	1.08849	-0.0454187	-3.55099	-1.88206	1.00968	-3.28465	0.810631	8.8902	-0.291139	6.93286	-0.639821	-4.55993	-2.29658	7.58366	-2.60003	1.23474	3.65735	-7.22693	0.205503	4.86231	-0.571565	-2.21974	0.33923	2.30758	-10.8354	#VALUE!	-10.945	-1.56538	-5.80685	-7.85075
E-3	-2.11076	-6.49659	-2.42649	3.03313	1.10524	-0.817989	0.746171	-1.50302	-5.52163	0.369498	-3.63206	0.318279	-4.3707	5.98884	-0.200978	-0.475596	0.917429	0.321528	-1.97145	-1.06021	1.02384	-2.78439	-0.190846	8.09404	-1.33379	5.79643	0.139624	-3.39075	-0.566442	6.43687	-1.88165	0.876133	3.97551	-5.9731	0.0983886	6.11481	0.456121	-1.53849	0.84951	1.58556	-14.6035	#VALUE!	-11.1094	-0.649632	-7.26997	-5.92918
E-4	-2.59727	6.38764	-2.45297	2.43046	0.880304	-1.61031	0.39862	-2.01172	-6.56188	0.352302	-4.0533	0.308669	-5.15975	0.711434	-0.842159	1.33705	0.888633	0.425168	-2.29143	-1.32047	0.780438	-3.10194	0.271491	8.39905	-1.81186	6.4302	0.183616	-4.15797	-0.92863	6.58812	-2.18482	0.705837	3.91143	-6.34171	-0.0371347	6.69665	-0.424873	-1.75269	0.574153	0.981622	#VALUE!	-13.5262	-14.1515	-1.27736	-7.73067	-5.33033
E-5	-3.01103	6.73202	-3.81887	2.58514	0.689021	-2.08032	0.0413614	-2.12485	-6.42693	-0.021045	-4.07621	1.0568	-5.7764	6.5665	-1.13495	0.743416	0.775932	-0.00424531	-3.35795	-1.75116	0.827558	-3.54589	0.0962635	8.84924	-1.34258	6.88382	-0.193501	-4.68362	-1.9451	6.84105	-2.69198	0.764084	3.72531	-6.29013	0.412942	6.72642	-0.381192	-2.26955	0.836672	1.77392	-13.2351	#VALUE!	#VALUE!	-3.19437	-6.84368	-6.00453
E-6	-3.14961	7.13636	-3.20402	2.06681	0.977086	-2.22591	0.282686	-1.55917	-6.09068	-0.0438756	-3.84193	1.75904	-4.90274	1.52163	-0.95503	0.129742	0.890784	0.0734654	-3.20526	-1.68484	1.00765	-3.27052	0.277954	9.258	-1.66361	7.52145	-0.605039	-3.89207	-2.1397	7.06293	-2.50915	1.23643	4.01488	-6.31643	-0.719923	6.74504	-1.3591	-1.97565	0.807272	2.54504	#VALUE!	#VALUE!	#VALUE!	-2.90327	-5.01262	-5.77761
E-7	-3.12967	7.39387	-4.44304	2.73627	1.03195	-3.0321	0.444526	-1.74875	-5.98989	0.367841	-3.94459	-0.479249	-5.29695	5.04527	-0.643773	-0.0175993	1.22852	0.252902	-3.90596	-2.11039	0.963709	-2.93868	0.995197	9.65974	-0.982259	7.85659	-1.19193	-4.60011	-2.82991	8.02205	-2.55067	0.761481	3.93414	-6.29153	-1.22667	7.535	-0.292836	-3.15249	0.511819	2.05815	#VALUE!	#VALUE!	#VALUE!	-3.67255	-5.97461	-4.77181
E-8	-3.04526	6.72005	-3.3772	2.49069	1.04514	-1.66415	0.531825	-1.82169	-6.64741	0.103574	-4.02414	0.2362	-5.56176	6.56036	-0.861352	0.512793	0.976436	0.0395293	-3.23426	-1.52785	0.854792	-3.05306	0.565674	8.16288	-1.98685	6.70386	-0.461926	-4.57664	-0.426008	6.78569	-2.33161	0.619089	3.45034	-6.5141	-0.134198	5.00869	-0.408223	-2.22748	0.486852	2.0307	-11.7782	#VALUE!	-11.7881	-1.11038	-6.55204	-5.96195
E-9	-2.90951	6.81812	-3.56317	2.32759	1.21287	-2.28384	0.32972	-1.85635	-6.80673	0.425012	-3.94675	0.888183	-5.09093	3.48511	-1.16358	-3.13748	0.94993	0.269891	-2.98802	-1.55493	1.19426	-3.01332	0.338143	9.59428	-1.53169	7.13673	-0.550545	-3.99447	-1.86383	7.41575	-2.04301	1.38483	4.05296	-6.27675	-0.392473	7.42193	-1.07482	-2.41978	0.628582	2.58809	-9.62495	#VALUE!	-8.59607	-2.12459	-6.01638	-5.21738
F-1	-2.63701	-13.9699	-1.89773	2.59709	0.734512	-0.995002	0.430761	-0.862582	-4.59231	0.603473	-2.96811	1.4957	-5.2454	7.83918	-0.510615	0.891495	0.988093	0.913377	-1.80565	-1.26879	0.923773	-3.00274	0.738867	9.56225	-2.1813	7.54001	0.0474044	-5.95722	-1.18976	8.10521	-1.76379	1.31085	3.51553	-6.24084	0.769384	7.84305	0.272085	-2.82709	0.345371	2.44833	#VALUE!	#VALUE!	-9.44271	-0.844886	-5.18342	-5.71118
F-2	-2.8195	-4.7769	-2.50293	2.31163	0.910876	-1.53139	0.484318	-2.18537	-6.92566	0.0785445	-3.70654	1.73159	-6.07674	7.95444	-1.08003	-4.22106	0.998489	0.567191	-1.97834	-0.999236	0.461053	-2.99594	1.15379	9.34922	-0.67784	7.78864	0.527637	-4.27662	-1.32867	8.18691	-2.28136	1.90519	3.29733	-6.57323	0.813804	8.06957	-0.227364	-1.99188	-0.144116	2.7105	#VALUE!	#VALUE!	#VALUE!	0.141658	-7.8889	-5.5264
F-3	-2.55235	7.23246	-3.44964	2.2696	0.33409	-1.46627	0.185574	-2.08428	-6.28456	-0.299862	-4.20628	0.500544	-5.74689	7.41388	-1.07669	0.329095	0.373676	0.0945691	-2.38379	-1.81336	0.00634609	-3.66389	-0.143907	8.98972	-3.08135	7.27869	-0.354459	-4.77808	-1.46679	7.89928	-2.68475	0.960117	2.75206	-6.25424	0.672646	7.60467	0.01526	-2.87409	-0.0885009	1.84173	#VALUE!	#VALUE!	#VALUE!	-0.889241	#VALUE!	-5.99752
F-4	-2.93694	6.38122	-2.46242	1.61116	0.648556	-1.46291	0.212301	-1.38539	-5.82906	0.312013	-3.6934	0.440458	-4.63315	6.66957	-1.08829	-0.239187	0.736161	0.493848	-2.07968	-1.22503	0.508686	-3.171	-0.177831	8.21107	-2.40841	6.60217	0.30293	-5.31657	-1.4159	7.12417	-2.043	1.03177	3.01092	-6.60224	-0.0225823	6.54152	-1.2444	-2.7498	-0.00664123	1.3553	-14.6896	#VALUE!	#VALUE!	-0.523756	#VALUE!	-5.99547
F-5	-2.9225	6.43674	-2.7311	2.04041	0.268505	-1.07206	0.152019	-1.49939	-5.61535	-0.21335	-3.93877	0.430046	-5.40645	6.65177	-1.14524	-0.672815	0.341722	0.16276	-2.20581	-1.18582	0.0545121	-3.33947	-0.437628	8.01589	-2.12013	6.43668	0.16686	-4.45736	-1.07268	7.35414	-2.59852	0.778099	3.38663	-6.42474	0.503601	7.05696	-0.288739	-2.82953	0.0947528	1.84537	-10.2738	#VALUE!	-10.6157	-1.21944	-5.3033	-6.57249
F-6	-2.87345	-7.78505	-2.19274	2.68569	0.86792	-1.04999	0.39673	-1.09128	-4.60525	0.577709	-2.86812	0.465474	-4.93539	6.99495	-0.926353	0.236213	0.949424	0.895411	-1.93607	-0.586484	0.905625	-2.84562	0.0697582	8.88591	-1.24177	6.68197	0.776522	-5.86718	-1.81094	7.56552	-1.97736	1.04898	4.352	-6.42546	-0.218488	7.2773	0.215062	-2.48639	0.54901	1.3262	-11.6332	-16.6326	-9.21902	-0.0362587	-7.17155	-5.22593
F-7	-2.7299	7.39662	-3.20519	3.61144	0.909057	-0.677548	0.637496	-1.47703	-5.56647	0.276288	-3.33145	1.56086	-5.59263	1.96657	-0.106877	-14.8555	1.01373	0.818879	-2.05728	-0.812143	0.616813	-3.18876	0.716691	9.38851	-1.24448	7.55768	0.327972	-5.40554	-1.91617	8.02672	-2.22568	1.54947	3.74403	-6.15654	1.07604	7.06906	1.48796	-2.37103	1.21547	1.95279	-13.9993	#VALUE!	-9.89168	-0.594476	-7.734	-4.43083
F-8	-2.80906	7.0832	-3.23948	2.76707	0.503404	-1.08144	0.210954	-1.87059	-5.16096	0.121337	-3.52621	0.543694	-5.97944	7.00405	-0.861134	-5.39483	0.606935	0.472128	-2.39437	-1.48398	0.408135	-3.31561	0.278086	9.33779	-2.60011	6.80481	-0.00902972	-5.93352	-1.47671	7.34963	-2.27036	1.05299	3.45671	-6.31308	0.611638	7.21499	0.396033	-2.26635	0.386701	1.37597	-13.618	#VALUE!	-11.0543	-0.688634	-7.47428	-6.10298
F-9	-3.00817	6.56649	-2.74696	2.4116	0.414256	-1.23237	0.0260466	-1.98059	-5.97659	-0.30134	-3.79942	0.621422	-5.45856	6.64292	-0.906345	0.2707	0.396533	0.291481	-2.48754	-0.913099	0.270881	-3.38037	-0.22889	8.56497	-2.32714	6.66643	-0.105134	-5.3073	-2.30975	6.76481	-2.40555	1.05909	3.58714	-6.35831	0.0739464	6.84934	0.0830614	-2.37821	0.144607	1.90591	-11.6579	-14.5738	-10.5172	-0.480313	-8.81417	-6.02261
G-1	-3.46068	6.19346	-2.72309	2.34105	0.450339	-0.972091	0.342662	-1.11783	-5.47409	0.0559789	-3.61714	0.483164	-5.04751	6.03218	-0.578938	-0.11796	0.436216	0.24663	-2.23049	-1.11445	0.493676	-2.98668	-0.300963	8.36553	-3.02948	6.17645	-0.255902	-5.4496	-0.97914	6.07181	-2.27133	0.877791	3.42806	-5.99753	0.0466383	6.43322	-0.487315	-2.02497	0.0670134	1.6953	-13.4952	#VALUE!	#VALUE!	-1.2218	-8.31644	-7.45012
G-2	-3.40737	-4.17249	-3.14332	3.14556	0.685964	-0.509503	0.804989	-1.79233	-5.35134	-0.29201	-3.57129	0.675686	-5.05655	6.93043	-0.34413	0.222331	0.679048	0.305895	-2.34499	-1.2528	0.257519	-3.47511	0.0437549	8.99786	-1.7659	6.95457	-0.311184	-4.37265	-1.13008	6.96804	-2.50554	1.17671	3.07147	-6.04938	0.873776	7.39989	0.82868	-1.9621	0.673159	2.11473	#VALUE!	-15.9835	-14.0436	-0.870811	-6.82682	-5.73067
G-3	-3.15656	6.64981	-3.09717	2.45267	0.28732	-0.767425	0.206304	-1.53033	-4.98449	-0.126084	-3.84373	0.800647	-5.7392	7.01873	-0.779996	-0.167901	0.417353	0.317027	-2.204	-1.40236	0.270841	-3.42874	-0.323729	8.47308	-3.06997	6.40806	-0.44913	-4.56744	-1.3228	6.7046	-2.39052	0.601338	2.94771	-6.52961	0.51999	6.64723	-0.285265	-2.19148	0.343609	1.2916	#VALUE!	#VALUE!	-9.78152	-1.32466	-8.08545	-5.48683
G-4	-2.61004	-4.08054	-2.3727	2.99132	0.751898	-0.551362	0.730187	-1.42655	-5.10052	0.215494	-3.14113	1.0363	-5.0283	6.82482	-0.305254	-5.67219	0.825997	0.728743	-2.05695	-0.7031	0.710046	-2.95365	0.24312	9.13541	-1.85887	6.83479	0.143111	-4.35358	-1.1909	6.99786	-2.02674	1.24678	3.64185	-5.75853	0.60995	6.71196	0.699194	-2.10289	0.578789	1.63616	#VALUE!	#VALUE!	-10.3857	-0.333209	-7.3032	-5.18405
G-5	-3.3999	6.94413	-3.38776	2.23213	0.397376	-0.999775	0.568914	-1.60995	-5.40694	-0.0330408	-4.1178	0.135263	-6.03841	6.93541	-0.904141	0.033684	0.519716	0.139981	-2.00117	-1.39528	0.318349	-3.02348	-0.203685	8.65967	-2.45184	6.39999	-0.206063	-4.81137	-1.80658	6.8801	-2.16779	1.0107	3.21777	-6.11345	0.32754	6.81561	-0.204366	-2.55593	0.0885025	1.21386	#VALUE!	-14.3737	-10.5702	-1.09999	#VALUE!	-4.7669
G-6	-2.92118	-6.50916	-2.32742	2.50711	0.993904	-0.750459	0.666867	-0.797726	-4.32928	0.815223	-2.57592	0.00782651	-4.47709	7.28838	-0.464647	-5.0995	1.11607	1.17124	-1.70251	-0.56849	1.34146	-2.38446	0.44207	9.51877	-1.50098	6.7232	0.864524	-6.91683	-1.78295	7.48561	-1.74959	0.900368	4.13384	-6.23785	0.176841	7.56666	-0.357521	-2.0177	0.411162	1.34017	-12.9856	#VALUE!	-13.4629	-0.618617	-10.8304	-4.07612
G-7	-3.27694	-3.92414	-4.43944	3.6271	0.630206	-0.854863	0.581772	-1.91961	-5.59107	-0.164187	-3.97568	1.04567	-6.78512	7.62083	0.0726385	0.738853	0.749367	0.4577	-2.82731	-1.07619	0.49492	-3.25643	0.534887	9.68771	-1.10777	7.2079	-0.267365	-5.23694	-2.66768	7.85007	-2.48398	1.54332	2.9912	-5.98307	1.04411	7.30618	1.05789	-2.66968	1.34723	1.9179	#VALUE!	#VALUE!	-12.6039	-1.85587	-6.60232	-4.11483
G-8	-2.46217	-3.27327	-3.03168	2.69545	0.43567	-0.978007	0.355569	-1.74199	-5.55511	-0.274195	-3.91148	1.38844	-5.7383	6.95738	-0.466747	1.0042	0.390899	0.28563	-2.24218	-0.908467	0.405985	-3.48924	0.33041	9.0746	-2.90969	7.36763	-0.408934	-4.73185	-2.14215	6.93437	-2.26783	1.70839	2.95664	-5.50946	1.07907	7.3431	0.0326286	-1.68513	0.66367	2.31813	#VALUE!	#VALUE!	-11.6618	-1.18998	-7.3623	-4.65731
G-9	-2.81091	-5.7342	-2.7216	2.95196	0.728348	-0.572526	0.667638	-1.35874	-6.00453	0.0979029	-3.30104	0.901317	-5.2724	6.71136	-0.465285	0.596001	0.70347	0.477068	-2.02389	-0.694381	0.734807	-2.94796	-0.0524986	8.9579	-3.0732	6.96038	-0.055718	-4.26006	-1.66948	6.97241	-2.20411	1.34732	3.32551	-5.80764	1.00533	6.89872	0.346006	-1.84882	0.777285	1.71826	#VALUE!	#VALUE!	-10.4161	-0.504706	#VALUE!	-6.55328
H-1	-3.43558	6.39942	-2.94416	1.95246	0.584088	-1.42209	0.237153	-0.91076	-5.30539	0.301848	-3.14852	-0.675026	-4.62372	6.8936	-0.691763	-1.44001	0.723932	0.335838	-2.18293	-1.20315	1.05585	-2.8737	-0.336879	8.54317	-2.14247	6.37209	0.193612	-6.73222	-1.74905	6.98432	-2.3419	0.77898	3.67922	-6.24247	-0.137405	7.23309	-0.349086	-3.15429	0.726453	1.04747	#VALUE!	#VALUE!	#VALUE!	-2.18305	-6.56181	-5.57794
H-2	-2.91007	6.37594	-2.08247	1.71136	0.473034	-1.11753	0.0737532	-1.14247	-5.15429	0.336099	-3.37721	-0.097666	-4.61307	6.6147	-0.983514	-1.17189	0.537275	0.474768	-2.02487	-0.770234	0.72994	-2.73303	-0.319174	8.42737	-2.51109	6.44694	0.624075	-6.56129	-1.39997	6.81635	-2.21663	0.557925	3.71626	-6.61764	-0.227138	7.2537	-0.974044	-3.1471	-0.0174527	1.00037	#VALUE!	#VALUE!	-11.3922	-1.53126	#VALUE!	-5.88511
H-3	-2.74029	6.1784	-2.5558	2.26885	0.446211	-0.928684	0.214424	-1.18659	-5.65614	0.119914	-3.52165	-0.35469	-4.66223	6.38587	-0.962862	-0.929466	0.570749	0.409641	-1.72673	-0.757699	0.579898	-2.87232	-0.426367	7.85212	-2.82546	5.84929	0.38842	-5.17042	-0.950116	6.72595	-2.58397	0.601859	3.59565	-6.28477	-0.341047	6.89532	0.00160936	-2.52329	0.0873932	0.789033	#VALUE!	-15.5965	-9.88933	-1.62471	-5.52291	-5.62722
H-4	-3.17073	6.42872	-2.59072	2.1005	0.580428	-1.79737	0.124663	-1.90801	-5.08171	-0.0738173	-3.59924	0.594201	-5.02452	6.7017	-1.16374	-0.825707	0.601285	0.0310889	-2.00482	-1.32695	0.550601	-3.31851	0.287934	8.07049	-1.84815	6.58804	0.483442	-4.94767	-1.74337	6.85017	-2.873	1.17573	3.45989	-6.59166	-0.341749	6.86553	-0.597101	-2.46073	0.0297784	1.7651	#VALUE!	#VALUE!	-13.4004	-1.31916	-10.5004	-6.53334
H-5	-2.70258	6.46894	-2.72411	2.5052	0.535849	-1.33952	0.0905283	-1.0801	-5.2603	0.194963	-3.7787	-0.520358	-4.66764	6.44679	-0.71859	-0.964521	0.572622	0.377096	-2.08138	-0.836571	0.596726	-2.80465	-0.288107	8.23853	-2.67274	6.24075	0.480578	-5.93962	-2.31954	6.80728	-2.5074	0.597595	3.51012	-5.764	-0.253205	6.80789	0.253778	-2.86572	0.391799	0.972318	-18.138	#VALUE!	-10.564	-0.655709	-7.05493	-6.20643
H-6	-2.55873	6.36876	-2.95518	2.58031	0.561576	-1.5	0.214079	-1.37473	-5.7614	0.0622793	-3.9091	0.420169	-4.99896	6.32842	-0.657875	-1.29076	0.603522	0.194041	-2.16796	-1.12155	0.747848	-3.08656	-0.0717298	8.50598	-2.07082	6.32158	0.245735	-5.69584	-1.79987	6.78383	-2.58808	0.830729	3.47509	-5.82731	0.0126494	5.95294	0.142737	-2.74646	0.58273	1.24788	-11.3669	#VALUE!	-12.586	-1.03328	-9.09838	-5.72879
H-7	-2.22676	-4.43446	-2.77447	3.79294	1.12785	-0.864365	0.805234	-0.971607	-5.05997	0.458309	-3.36536	0.818216	-5.08818	-3.75245	0.226097	-2.1303	1.28908	0.840765	-1.92825	-0.689632	1.32811	-2.93885	0.696114	9.83332	-2.51112	7.61318	0.561324	-4.99625	-2.38343	7.83956	-2.04375	1.82431	3.70535	-5.84612	0.537892	7.45152	1.63858	-2.45977	1.62358	2.45376	-14.2418	#VALUE!	-14.4839	-2.27617	#VALUE!	-5.09303
H-8	-2.60968	6.74186	-3.34656	2.5981	0.423931	-1.43788	-0.193599	-1.71392	-5.73754	-0.426817	-3.96554	0.898998	-5.25208	6.79995	-0.945376	-1.08165	0.456324	-0.0684336	-2.52845	-1.07003	0.686143	-3.69143	-0.144907	9.05881	-2.49769	6.78135	-0.203078	-5.62894	-2.29334	6.87111	-2.76798	1.26896	3.09805	-6.29572	-0.116806	6.96156	0.221364	-2.22295	0.811642	2.56225	-14.2337	#VALUE!	-9.74299	-2.34675	-6.98103	-6.74981
H-9	-2.47791	6.71754	-3.25501	2.43613	0.45912	-1.56409	-0.139355	-1.23791	-5.9768	-0.0391847	-4.12514	1.13923	-5.69263	6.89289	-0.999559	-1.61812	0.607433	0.166518	-2.08513	-1.69506	0.84298	-3.54018	-0.0653599	8.74174	-2.65485	7.01085	-0.203108	-5.28193	-2.61679	6.77133	-2.72062	1.39821	3.21001	-5.87097	-0.159205	7.24026	-0.0954071	-2.44145	0.903442	2.01808	#VALUE!	#VALUE!	#VALUE!	-2.70621	#VALUE!	-6.11213
I-1	-4.17828	7.86894	-3.2951	2.93953	-0.0358044	-2.37979	-1.31874	-1.48141	-8.77578	-1.07039	-3.65137	3.19514	-5.85241	7.27962	-1.20238	1.51101	-0.114101	-1.0124	-2.55388	-2.36926	-0.454578	-4.5975	-0.121694	8.92251	-0.597933	7.14027	-1.57526	-5.61967	-1.78209	7.92692	-3.45976	3.96563	3.09505	-6.1444	0.560802	7.14064	-0.0559562	-1.55605	-0.424546	4.13449	#VALUE!	6.60332	#VALUE!	-1.21631	-4.02181	-7.27624
I-2	-3.54438	-3.33631	-2.88734	3.26322	0.214861	-1.94847	-0.769805	-1.22906	-4.78525	-0.778472	-3.47515	2.38187	-5.67296	7.76261	-1.13744	-0.423631	0.0677657	-0.419799	-2.07995	-1.70108	0.205704	-3.77438	0.109748	8.833	-1.2429	7.64829	-0.718975	-6.0674	-1.64695	8.35776	-2.94496	3.57232	3.52424	-6.30021	0.763466	7.5292	-0.187328	-0.895372	-0.526078	4.25961	-10.4758	2.93146	#VALUE!	-0.555734	-5.25484	-7.34681
I-3	-3.1511	7.43737	-3.65837	2.67836	-0.0554552	-2.46421	-0.84288	-1.86071	-4.96742	-1.07881	-4.00887	3.21241	-7.18871	6.8866	-1.7866	-0.758566	-0.22077	-1.17393	-2.05529	-2.54869	-0.235211	-4.07149	0.188433	8.62365	-0.109516	6.83083	-1.45622	-5.08968	-1.73193	7.69539	-3.31509	4.11428	3.20748	-6.45314	0.0717295	7.03525	-1.08838	-0.918675	-0.353979	4.66189	#VALUE!	4.5302	-11.6805	-0.641692	-4.10409	-9.31316
I-4	-3.55331	8.17066	-3.56773	2.8712	-0.102475	-2.01216	-0.790714	-1.66121	-6.15798	-1.16266	-4.4127	2.3102	-5.60742	7.03431	-1.27354	-0.613211	-0.175343	-0.9309	-2.1822	-2.42582	-0.307761	-4.16816	0.267278	8.95848	-1.74728	7.72442	-1.31864	-5.36256	-1.82565	8.38421	-3.35144	3.34767	2.96766	-6.48919	0.59967	6.91449	-0.551136	-1.14589	-0.712089	4.05889	#VALUE!	8.69999	-9.16336	-0.758712	-4.84699	-7.55458
I-5	-3.98723	7.75557	-3.01452	2.36389	0.234778	-1.64998	-0.416973	-1.60888	-5.55365	-0.781937	-4.13604	2.22709	-6.06858	5.85557	-1.70166	-1.08802	0.0200853	-0.610475	-1.92648	-1.73144	-0.122963	-3.39261	-0.342646	7.82079	-1.68835	7.06346	-0.538665	-3.97267	-1.69851	6.05322	-2.65511	3.54414	3.43533	-5.73983	0.500118	5.93398	-1.67649	-0.481981	-0.483917	4.26158	#VALUE!	7.07857	-9.24117	-1.5903	-5.71312	-7.28468
I-6	-4.71312	9.25019	-4.11826	3.07328	-0.0486674	-2.33479	-1.386	-1.96288	-6.4102	-1.51773	-4.073	3.84423	-6.37666	7.23666	-1.64149	0.234778	-0.565508	-1.40873	-2.40334	-2.04709	-0.411178	-4.34621	0.524262	9.12681	-0.616606	7.7548	-1.26123	-5.05479	-2.03329	7.75361	-3.58974	4.44654	2.59672	-7.17021	0.216944	7.30676	-0.76565	-1.32834	-1.02832	5.24742	#VALUE!	4.15694	#VALUE!	-1.04003	-3.92274	-6.39648
I-7	-5.28582	8.20283	-3.30251	2.98441	-0.0771854	-1.45024	-0.791576	-3.06237	-5.80977	-1.76468	-4.6094	5.20425	-6.03132	6.86997	-2.32297	0.0502069	-0.114619	-1.27966	-2.51662	-2.41932	-0.0626449	-4.22275	-0.138962	8.47708	-0.514973	8.456	-1.7456	-4.93114	-2.20349	7.55203	-3.50087	4.39448	2.3515	-7.01631	0.78071	6.06439	-0.841532	-0.362368	-0.275142	5.26597	#VALUE!	7.54798	#VALUE!	1.05295	-2.96724	-6.08772
I-8	-3.44411	-3.67	-3.60949	3.64839	-0.243693	-2.001	-0.674212	-2.41692	-6.10938	-1.41987	-3.84816	3.79261	-6.79603	8.0601	-1.29665	-0.0952907	0.0899739	-0.791006	-2.40701	-2.39999	-0.307639	-4.47165	0.324322	9.6481	-1.24019	8.71322	-1.66497	-4.07256	-2.42235	8.57068	-3.33202	4.2166	2.70973	-6.58108	1.0177	7.83335	0.126128	0.537018	-0.145682	6.17304	-7.87504	10.6925	#VALUE!	-0.600516	-5.04254	-7.0961
I-9	-3.21867	-5.25602	-2.77637	3.2362	-0.171044	-1.53396	-0.749322	-1.43936	-5.18766	-0.592787	-3.48456	3.57177	-6.75559	8.53331	-1.0532	-0.761212	-0.158892	-0.434918	-2.37032	-2.31103	0.142831	-3.68904	0.151666	10.0498	-1.54853	7.90773	-0.8631	-6.21863	-2.65965	9.89317	-3.02742	3.79467	3.61437	-6.64592	1.28979	8.19387	-0.684501	-1.1834	-0.771713	5.16771	#VALUE!	-3.57451	#VALUE!	-1.41066	-4.24974	-7.70506
J-1	-4.19356	7.58526	-3.0525	3.71282	-0.028685	-1.65434	-0.71836	-1.73348	-7.39054	-1.29892	-4.46094	3.98119	-5.54373	6.74175	-1.43075	-0.357256	-0.22252	-0.552657	-1.86791	-2.1008	0.138286	-3.81406	-0.0665057	8.87938	-1.01393	6.62395	-1.05964	-5.08204	-1.63308	7.55071	-2.89373	3.26048	3.13454	-7.27437	-0.479194	6.09898	0.0260876	-0.880562	-0.643353	3.71401	-13.4182	8.34857	#VALUE!	-0.445599	-3.68967	-7.35626
J-2	-4.09691	9.68034	-3.56317	3.27817	-0.247555	-1.6792	-0.959883	-1.71008	-6.02427	-1.51691	-4.31492	2.73786	-6.49056	7.55864	-0.958378	0.563612	-0.281548	-1.00265	-2.3867	-2.71438	-0.379034	-4.33914	0.112488	8.60319	-1.51464	7.52784	-1.39903	-4.79015	-1.71868	8.0995	-3.29582	2.79085	2.60697	-7.59277	0.780862	7.21061	-0.153433	-1.09901	-0.986037	3.66391	#VALUE!	8.84875	-10.1295	-0.0138154	-3.73094	-6.26228
J-3	-3.88054	8.5624	-2.88752	3.07688	-0.38363	-1.41989	-0.916164	-1.85323	-6.31994	-1.07185	-4.36874	3.5929	-5.91327	7.15231	-1.81733	0.243655	-0.0607773	-0.462106	-2.36388	-2.05257	-0.451797	-3.7142	-0.234889	8.63558	-1.33025	7.22459	-0.989369	-5.03515	-2.51103	8.53535	-2.88716	2.7025	2.98685	-7.52241	0.0877156	6.59519	-0.0523425	-1.1209	-1.20716	3.43214	-12.4568	8.15364	#VALUE!	-0.361071	-4.46819	-6.84596
J-4	-3.38269	-3.43994	-3.45313	3.58788	0.234829	-0.971343	-0.139011	-1.58876	-6.02785	-0.733069	-4.10177	2.6439	-6.2574	7.436	-1.13707	0.694794	0.222826	-0.510658	-2.12858	-2.08573	0.22616	-3.57824	0.717451	9.36457	-0.946803	7.3034	-1.18258	-4.52572	-1.55892	8.2812	-2.42237	3.46276	3.26979	-6.86161	0.681242	6.81016	0.293083	-1.30621	-0.899686	4.00908	#VALUE!	7.73036	-8.60434	-0.286798	-3.65279	-5.71045
J-5	-4.26948	9.18325	-3.87308	3.42845	-0.176787	-1.15459	-0.35871	-1.67748	-6.50757	-1.23713	-4.94376	2.49438	-6.88654	7.86796	-1.43821	0.308412	-0.232437	-0.873683	-2.42528	-2.1933	-0.284426	-3.76885	0.0283965	9.01986	-1.14059	6.86057	-1.54376	-4.35111	-2.41104	8.60736	-2.64978	2.71872	2.847	-6.90374	0.0959626	6.84984	0.214033	-1.64696	-1.21281	3.63692	#VALUE!	8.34579	-8.68878	-0.243894	-5.54472	-5.88981
J-6	-3.10625	-1.55288	-3.04704	2.95881	-0.10438	-1.77545	-0.963483	-2.06201	-6.5582	-1.66135	-5.60757	5.48822	-7.19217	7.34459	-1.25828	1.14795	-0.221657	-1.05415	-1.83978	-2.2596	-0.787612	-4.27095	1.22897	9.27259	-0.559661	8.70435	-1.70048	-4.18904	-1.62322	8.69725	-2.53675	4.58534	2.55419	-6.94882	1.18598	6.77708	-0.247906	-0.426375	-0.952458	4.56221	#VALUE!	8.22577	#VALUE!	0.00457491	-3.36812	-7.30381
J-7	-4.62418	7.74551	-3.29826	2.7518	0.284923	-1.42172	-0.831937	-2.07368	-6.16814	-1.32495	-4.27751	4.2799	-6.11713	5.85872	-1.98588	0.784653	-0.0746255	-0.890794	-2.55372	-1.98851	-0.20451	-3.82709	-0.256213	8.42335	-0.66029	7.68436	-0.775512	-3.81002	-2.2511	7.23802	-2.904	3.7949	2.96474	-7.67549	-0.409412	6.13871	-0.703021	-0.533278	-0.59583	4.28719	#VALUE!	7.12585	-9.37015	-0.328133	-2.99404	-6.18645
J-8	-3.40755	7.97966	-3.63118	3.42654	-0.0216655	-1.80913	-1.14031	-1.70173	-6.44594	-1.74191	-4.82389	4.97622	-6.68098	7.03833	-1.35278	0.489465	-0.512989	-1.05517	-2.62107	-2.49628	-0.527396	-4.34008	-0.0162074	8.9409	-1.4852	7.61996	-1.73701	-4.06081	-2.59358	7.70921	-3.1684	3.50926	2.94463	-7.32932	0.479944	7.13	-0.220338	-0.69054	-0.63648	4.00383	#VALUE!	3.12347	#VALUE!	-0.448194	-6.7525	-5.26575
J-9	-4.24806	9.60023	-3.60265	3.28189	-0.506792	-1.34579	-1.17194	-2.09836	-6.34462	-1.38229	-4.357	3.83307	-6.22697	8.26039	-1.75315	-0.422928	-0.782863	-0.669009	-2.71442	-2.79262	-0.512558	-4.4853	-0.197442	9.2185	-1.72272	8.92553	-1.65633	-4.48025	-3.31496	8.51065	-3.1464	3.48752	2.73515	-8.14711	1.47437	7.34071	-0.33718	-1.11191	-1.25019	4.11378	-11.2999	4.03879	#VALUE!	-1.00389	-6.9963	-6.91099
K-1	-4.92678	9.28126	-3.21368	4.38371	0.229011	-1.29937	-0.677959	-1.4039	-8.21485	-0.893748	-4.29816	3.33479	-7.44276	8.7043	-1.12962	0.6189	0.0218748	0.181647	-2.472	-1.87853	0.399431	-3.5709	0.237996	10.1986	-0.928363	6.3149	-0.707649	-8.36068	-3.45391	9.11159	-2.74596	2.63413	3.69444	-8.51849	-0.0683681	5.41952	0.810276	-2.29217	-0.567221	3.48869	#VALUE!	1.61752	#VALUE!	0.368761	-6.00814	-8.26922
K-2	-4.45461	-3.83647	-3.09911	3.84902	0.617435	-0.724141	-0.371406	-2.64223	-6.74897	-1.32149	-4.04935	3.80609	-6.92277	7.64699	-1.54984	1.10141	0.591228	-0.263471	-1.89997	-1.84791	0.074268	-4.07586	-0.084919	9.37406	-0.731153	8.14988	-0.956496	-4.56906	-1.61984	9.17972	-3.2519	3.56719	3.21586	-8.37442	0.249503	7.2147	0.627086	-0.488692	-0.034173	4.65379	#VALUE!	9.16786	#VALUE!	0.284129	-4.38985	-8.33845
K-3	-4.58469	8.33884	-3.47956	2.52282	0.042406	-1.86082	-0.88209	-2.17072	-5.43371	-0.876665	-4.28669	2.72302	-6.7547	7.40115	-1.98062	0.197868	0.0169918	-0.346308	-2.12096	-2.07557	-0.0368134	-4.45342	0.586023	9.24828	0.376948	7.27295	-0.639483	-5.72545	-1.80203	7.90058	-3.41615	3.26943	3.34208	-8.64089	0.410237	6.75206	-1.21427	-0.934669	-0.640933	3.95555	-11.0107	8.7267	#VALUE!	-0.751293	-6.62656	-9.44709
K-4	-4.01211	-0.700271	-4.06556	4.13093	0.200723	-0.849413	-0.256144	-1.94419	-6.35092	-1.21349	-4.66998	3.13817	-7.47879	8.40569	-1.20976	1.39808	0.128995	-0.313578	-2.02624	-2.50937	0.0539658	-3.98789	0.434359	10.2462	0.102039	7.26952	-1.26609	-5.72148	-2.03258	8.96453	-3.4342	3.24647	3.02987	-8.04132	0.376281	7.56267	0.466427	-1.33865	-0.50368	4.77082	#VALUE!	5.12761	#VALUE!	0.459076	-4.58045	-10.0017
K-5	-4.98353	7.96028	-3.19049	4.16604	0.606755	-0.996736	0.0272389	-1.639	-5.36285	-0.562755	-3.87255	2.4644	-6.46733	8.34001	-1.05072	-10.5047	0.453418	0.169338	-2.36147	-1.97736	0.449919	-3.50972	0.515872	10.136	-0.680329	7.36895	-0.96147	-5.79567	-2.92011	9.27306	-3.24468	3.14344	3.74646	-7.6184	-0.436799	7.30556	0.597234	-1.78776	-0.730601	3.93105	#VALUE!	3.40161	#VALUE!	0.659577	-4.68313	-6.66398
K-6	-4.28437	9.46133	-5.30018	3.48621	-0.528121	-2.10624	-1.33228	-2.54361	-6.71131	-3.04572	-5.46016	4.86284	-7.93628	8.33877	-0.808583	1.69892	-0.431004	-1.74398	-3.03698	-3.13608	-1.22842	-4.76852	1.91436	9.8672	0.313893	9.18719	-3.3434	-4.68781	-0.610948	8.28854	-4.86162	4.56798	1.23661	-8.78455	1.77639	7.38928	0.0473164	-0.0632713	-0.671126	4.98774	#VALUE!	8.9446	#VALUE!	0.348562	-3.10746	-6.38697
K-7	-4.69084	7.39557	-3.99588	3.54504	0.200539	-1.81736	-1.06972	-2.74216	-7.53944	-1.82484	-4.27323	5.05877	-7.21358	7.90885	-1.38242	2.23419	0.0749737	-0.887143	-2.42101	-2.10046	-0.435156	-4.99982	0.425232	9.10611	-0.718488	7.14886	-1.07212	-4.83233	-2.14557	7.77364	-3.65759	3.4372	2.71351	-8.76671	0.845751	6.8957	0.164883	-0.829702	-0.195003	4.68177	-10.8211	2.42333	#VALUE!	0.569833	-5.6696	-9.57758
K-8	-4.26242	8.82117	-3.93321	3.81236	0.2298	-1.79354	-0.838585	-2.48992	-6.19738	-1.55802	-4.25689	2.86767	-6.57718	7.07729	-1.30637	1.28577	0.153615	-0.753459	-2.68559	-2.39755	-0.756648	-4.58607	0.307679	9.47174	-1.5566	7.4515	-1.39707	-5.21397	-2.68762	8.54339	-3.73957	3.35984	2.76283	-8.17239	0.69562	6.84505	0.348943	-0.708136	-0.47784	4.31176	#VALUE!	-5.68276	-11.0642	-0.252448	-6.27502	-8.00085
K-9	-4.41997	9.22799	-3.63224	3.24051	-0.142465	-1.39387	-0.903596	-2.30308	-7.66766	-0.855995	-3.9738	3.95172	-6.07821	7.85525	-1.8487	-0.012448	-0.03581	-0.511869	-2.23462	-3.13729	-0.308107	-4.32376	-0.268303	9.24231	-1.72887	8.10482	-1.21172	-4.61489	-2.81467	9.38096	-3.52805	3.34316	3.42334	-8.69881	0.2267	7.48806	-0.553339	-1.54938	-1.06076	4.32744	-10.6591	-5.79548	#VALUE!	-1.39108	-6.12469	#VALUE!
L-1	-3.89359	8.18103	-2.32786	3.59396	-0.115585	-1.27634	-0.997443	-1.20829	-6.55021	-0.247055	-3.75479	1.63843	-6.24117	9.462	-1.00223	-0.113341	-0.210465	0.450577	-2.51654	-1.63148	0.733625	-3.07534	-0.449523	9.30175	-1.29635	5.39623	-0.169394	-9.28803	-4.29808	8.44583	-2.29876	2.24968	3.85938	-7.2669	0.36559	7.48863	-0.461966	-1.99793	-1.13459	2.65655	#VALUE!	8.77509	#VALUE!	-0.367992	-10.4068	-9.68172
L-2	-4.51371	8.97315	-4.22431	3.81115	0.159575	-1.34127	-0.908808	-2.43046	-5.83809	-0.842369	-4.37424	1.46354	-6.54764	8.4112	-1.39084	1.06435	0.150639	-0.367997	-2.40655	-2.19193	0.0864886	-4.23654	0.0204752	9.8479	-0.561511	6.57596	-0.669793	-6.64246	-3.5138	8.58909	-3.02487	2.48225	3.21003	-7.93523	0.147873	7.79164	0.14581	-1.52446	-0.823583	3.37934	#VALUE!	-7.27798	-9.95899	-0.0139123	-7.54474	-7.88761
L-3	-4.28636	7.5179	-2.757	3.32201	0.22813	-1.14117	-0.476588	-1.80148	-6.31566	-0.305151	-3.83482	1.69988	-6.27723	7.41236	-1.56495	0.321835	0.256205	0.0788971	-2.05269	-1.86786	0.74305	-3.34002	-0.158269	9.29749	-1.19679	5.83289	-0.0895939	-6.73902	-2.87061	8.41178	-2.68885	2.2595	3.86846	-7.30727	-0.574147	6.74932	-0.654034	-1.6479	-0.975275	2.92302	#VALUE!	7.08963	#VALUE!	-0.77473	-6.08826	-8.9044
L-4	-4.48557	7.60019	-2.30491	3.15239	0.477769	-0.814355	-0.0196745	-1.35503	-5.88241	-0.0276471	-3.80688	1.24949	-6.28229	7.22324	-1.47596	-1.53803	0.397739	0.239068	-1.58992	-1.55323	0.528796	-3.4204	-0.756338	8.287	-1.39276	5.73226	0.261449	-7.20299	-1.9864	7.23266	-1.98893	2.11953	4.07448	-7.49161	-0.483166	6.54748	-0.781575	-0.814672	-0.60635	2.93757	#VALUE!	-0.122643	-11.3046	-1.05535	-9.89602	-7.30034
L-5	-4.2945	7.60098	-3.01475	3.12913	0.317081	-0.825145	-0.516296	-1.8765	-7.55525	-0.288222	-4.34672	2.14228	-7.33512	7.39797	-1.54998	-0.193114	0.302857	-0.0816967	-1.69543	-2.09381	0.405523	-3.87205	0.0882776	9.39856	-0.677186	6.52916	-0.403291	-6.4372	-2.2419	7.87607	-2.35963	2.74986	3.64289	-7.40594	0.173816	7.24217	-0.667314	-1.93038	-0.863312	3.52811	#VALUE!	2.59277	-10.3114	1.19869	-9.17827	-6.01244
L-6	-3.60354	-4.06504	-2.87187	3.30637	0.597868	-1.93002	-0.521163	-1.9632	-5.59363	-0.676412	-4.26752	3.36439	-5.85232	7.49102	-1.25324	0.0622458	0.345536	-0.416728	-2.15346	-1.92325	0.223374	-3.75884	0.650665	9.17499	-0.775289	7.707	0.0639205	-4.94655	-1.94855	8.44115	-2.44358	3.63666	3.49406	-7.18043	0.158058	7.33494	-1.12712	-0.49799	-0.666645	4.38414	#VALUE!	1.68818	#VALUE!	0.202445	-6.83348	-6.72702
L-7	-3.81738	7.49633	-3.32129	3.52088	0.410664	-1.12216	0.0176073	-1.96942	-7.0972	-0.521728	-4.08847	1.68607	-6.46712	7.26903	-0.85787	-0.310209	0.531898	-0.258293	-2.30445	-1.83849	0.0201579	-3.25997	0.344563	9.25621	-1.54369	6.75751	-0.573877	-4.64441	-1.85662	8.06302	-2.72527	2.59502	3.40808	-6.73661	-0.310071	3.9294	-0.227264	-1.65252	-0.824115	3.02206	-10.2639	-3.43557	#VALUE!	-1.35626	-5.43324	-6.19688
L-8	-3.10078	8.80757	-2.93986	4.51342	0.951042	-0.801984	0.391778	-0.991304	-7.31464	-0.031526	-3.51646	0.633968	-5.77905	1.29757	-0.255905	-7.97293	0.846061	0.0861123	-1.91696	-1.30915	0.601225	-3.1241	0.711045	10.4003	-0.790331	7.59609	-0.376333	-4.79983	-2.55082	9.2779	-2.4259	2.97203	3.85833	-7.3268	0.0547018	2.20904	0.726413	-2.01836	-0.0932941	3.50175	#VALUE!	-4.22187	#VALUE!	-0.78473	-5.18997	-5.74524
L-9	-3.46103	8.2697	-2.88608	2.90797	0.160525	-1.40789	-0.463354	-1.49085	-5.24508	-0.269085	-3.22243	1.15287	-5.38907	3.32606	-1.58523	-1.72118	0.204248	-0.190647	-2.12323	-2.09704	0.279327	-3.15576	0.00267354	9.13314	-1.3163	7.74599	-0.355058	-6.45171	-2.84697	9.4148	-2.56222	2.84543	3.8692	-7.32442	0.246278	7.47921	-1.51299	-1.70291	-1.14619	2.88931	#VALUE!	4.13754	#VALUE!	0.601338	-6.60164	-8.68437
M-1	-4.36589	8.42155	-2.89715	4.20375	0.4793	-0.887406	-0.824918	-1.71149	-5.55387	0.145273	-3.33624	1.57867	-6.64735	8.34498	-0.903244	-0.518389	0.169198	0.569776	-1.79347	-2.28757	0.937765	-3.16257	-0.425146	9.32244	-2.36981	6.70381	-0.370621	-9.34865	-3.50301	8.95549	-2.37694	2.20702	4.09634	-8.16786	-0.615704	6.78358	-0.234238	-2.35587	-0.425125	2.1636	-11.596	2.58045	#VALUE!	0.10657	-13.9444	-9.08784
M-2	-4.3838	8.10749	-3.89448	3.46517	0.374082	-1.65163	-0.579114	-1.88493	-5.67838	-0.0211185	-3.65532	0.8502	-5.99987	8.06211	-1.4189	-0.951416	0.285646	-0.0094325	-2.18795	-2.05343	0.550907	-3.31519	0.105506	9.63972	-0.682885	6.30298	-0.533855	-6.86063	-3.19759	9.20065	-2.71326	2.74356	4.2521	-7.86891	-0.754529	7.17449	-0.728711	-2.27523	-1.22662	3.41258	#VALUE!	2.69735	#VALUE!	1.36176	-7.68659	-7.41685
M-3	-3.03823	-17.8037	-1.82749	4.23372	1.24034	-0.206635	0.607276	-0.931267	-4.08698	0.881498	-2.5167	2.50407	-5.28364	7.84392	-0.636825	-6.24844	0.939547	0.886389	-0.921566	-0.950552	1.50607	-2.46149	0.196858	8.98696	-1.09281	8.08864	0.615664	-5.69646	-1.37513	8.22857	-1.61566	3.01954	4.79141	-6.59232	-0.0311496	7.06684	-0.54491	-0.85367	-0.0953203	3.17355	#VALUE!	9.74735	-10.323	-0.398464	-9.41572	-5.89835
M-4	-4.27204	6.987	-3.34407	3.75015	0.380313	-0.899896	-0.150725	-2.08375	-5.4038	-0.171448	-3.88856	1.43654	-6.31752	7.33946	-1.22028	0.222751	0.219931	-0.22156	-1.7979	-2.02381	0.538373	-3.82	-0.29307	8.90264	-1.18524	6.1285	-0.752696	-5.59164	-2.08177	8.09411	-2.83729	2.48093	3.56297	-7.42885	-0.402847	6.14208	-0.339904	-1.79191	-0.293749	2.42859	-10.625	-6.49538	-9.62549	0.127761	-7.26021	-5.81902
M-5	-3.80912	7.922	-3.55903	3.74703	0.248305	-1.1432	-0.632137	-1.79976	-5.22419	-0.256333	-3.87654	1.41072	-6.52377	7.63374	-1.17396	-0.20185	0.0796481	-0.367662	-2.20755	-2.28424	0.542436	-3.79954	-0.186982	9.4896	-1.47157	6.5452	-0.740149	-5.80716	-3.12066	7.56574	-2.91738	2.62215	3.71988	-7.47653	-0.445955	6.94771	-0.383754	-1.78174	-0.424851	3.14145	#VALUE!	6.74952	#VALUE!	-1.04258	-7.49999	-5.73703
M-6	-2.42884	-4.8608	-2.99371	3.21065	0.351476	-1.93382	-0.789383	-2.19231	-5.35025	-0.582742	-4.00842	3.91928	-5.97687	7.74513	-1.35057	0.353002	-0.231219	-1.13438	-2.43356	-1.98187	0.237414	-3.65926	0.509669	9.38114	-0.695355	7.75237	-0.631557	-4.04405	-2.34931	7.71786	-3.14931	4.5906	3.42737	-7.14944	0.433079	8.16133	-1.4056	-0.835055	-0.66835	5.04566	#VALUE!	-1.97248	-5.70481	-1.4939	-4.20253	-5.43903
M-7	-3.80516	-3.3187	-2.50368	3.8106	0.84002	-0.999711	-0.0761524	-1.40749	-6.19264	0.115873	-3.30769	1.93593	-5.94447	9.53997	-0.750441	-0.674075	0.454816	0.217111	-1.91549	-1.08328	0.520472	-3.15217	0.173614	9.45386	-0.930979	2.09079	-0.241998	-5.51237	-2.0378	7.901	-2.66748	3.26738	4.24958	-6.84723	0.151393	7.47557	-0.806045	-1.79197	-0.58394	4.353	-10.6482	2.15833	#VALUE!	-2.11822	-6.13448	-6.16752
M-8	-3.80452	8.7281	-3.16215	3.89867	0.221085	-0.931238	-0.0613189	-1.26254	-5.87907	-0.104372	-3.38027	0.79167	-6.09714	1.0865	-0.908619	-0.61271	0.179032	-0.0738176	-1.89594	-1.96553	0.504448	-3.10188	0.157734	10.4581	-1.06643	2.80428	-0.474414	-5.89022	-2.94921	8.90285	-2.84334	2.74082	4.03641	-7.34441	-0.640843	8.0324	-0.354471	-1.56485	-0.483787	4.311	#VALUE!	0.261398	-8.92967	-1.6216	-4.98189	-5.52227
M-9	-3.14302	-2.11938	-2.87734	3.21074	0.210828	-1.0767	-0.0171748	-1.53348	-5.46514	-0.515085	-3.86802	3.80761	-5.30753	8.15726	-1.4546	-0.821832	-0.138521	-0.513919	-2.31777	-2.42615	0.217307	-3.50793	0.195506	9.34903	-1.74515	8.3623	-0.865467	-5.08343	-2.97808	8.29758	-3.0333	3.18684	3.45916	-7.07911	0.73463	7.80001	-1.34012	-1.5274	-0.5076	4.27443	#VALUE!	-1.85925	#VALUE!	-1.94199	-4.30535	-6.34807
N-1	-4.65116	7.99128	-3.59972	3.77362	-0.0633019	-0.793157	-0.47028	-1.74499	-5.92653	-0.416273	-3.55986	3.28547	-6.98794	8.34485	-0.888984	-0.776189	-0.0668372	-0.0992142	-2.21142	-2.51018	1.03013	-3.25313	-0.403404	8.93632	-1.88596	6.20435	-0.845456	-7.7584	-3.21881	8.63839	-2.45245	2.04119	3.3256	-7.8583	0.133498	6.49106	-0.182829	-1.2539	-0.0855727	3.76849	#VALUE!	8.27877	-13.0095	-0.863781	-9.64	-7.68666
N-2	-4.97534	-5.21311	-3.11074	4.0949	0.814088	-0.51535	0.0379064	-1.87049	-6.36219	0.0690778	-3.86495	2.36145	-6.12411	7.77634	-0.902777	0.714325	0.710468	0.00670406	-1.89427	-2.38923	1.33025	-3.06913	-0.113486	9.70016	-0.999582	6.78772	-0.07299	-5.95359	-3.00502	9.40292	-2.45246	2.61926	3.9637	-7.82725	0.31803	7.56552	0.0580126	-1.50534	-0.254528	4.14508	#VALUE!	-3.55334	#VALUE!	0.645875	-8.05911	-6.98435
N-3	-4.26084	-7.18374	-2.93773	4.69506	1.36952	-0.217203	0.807975	-1.15849	-6.24196	0.0640447	-3.32352	2.40547	-6.51318	8.84884	-0.347884	-10.1396	1.32857	0.246699	-1.52808	-2.0428	1.36333	-3.07804	0.708124	9.6494	-1.05243	7.11064	0.0167675	-4.5417	-1.96999	8.87718	-2.31257	2.99533	3.98955	-6.78303	0.512819	5.83991	0.872209	-0.39597	0.375699	3.95159	#VALUE!	8.8255	-9.20049	0.35884	-4.34269	-5.56579
N-4	-4.63391	8.69361	-4.01322	4.5443	0.718129	-0.605058	0.260328	-2.06586	-6.80621	-0.581486	-3.88025	2.98338	-6.75519	7.50941	-0.603803	-5.3547	0.555957	-0.588146	-2.03468	-2.51001	0.585241	-3.74838	-0.293217	8.9967	-1.1815	5.89644	-1.12507	-4.70339	-1.73585	8.28382	-2.96785	2.69608	3.11213	-7.76584	-0.422854	6.05445	0.783278	-0.725419	0.261862	3.16678	-16.0862	8.73324	-9.95444	-0.326478	-4.34871	-9.54732
N-5	-4.12073	-5.53976	-3.36198	4.95728	1.19048	0.171595	0.774836	-1.84337	-6.02449	-0.344841	-4.21095	2.51637	-6.46324	7.76477	-0.340837	-5.67873	1.32309	-0.101901	-1.43403	-2.29223	0.937514	-3.42255	0.289403	9.34784	-1.04738	6.45325	-0.55036	-4.27948	-1.803	8.82867	-2.53645	2.76994	3.56154	-7.13978	-0.161914	7.21584	1.10551	-0.912666	0.506478	3.89626	-17.0226	-6.02597	-11.6193	0.240996	-5.35749	-7.1436
N-6	-4.67791	8.45176	-3.92153	4.17533	0.483091	-0.85154	-0.111989	-2.31874	-8.54053	-1.24392	-4.87612	2.9817	-7.35916	7.95188	-1.04516	0.180886	0.307536	-0.927661	-2.19874	-2.45003	0.146365	-4.23541	0.277629	9.27586	-0.926114	7.19057	-1.05309	-5.19734	-2.31814	7.82254	-3.31383	3.17716	2.83919	-7.60742	0.0356374	6.71092	0.25749	-0.799436	-0.0857338	3.794	-10.9798	1.34665	-10.9492	-0.405009	-8.35017	-7.38319
N-7	-4.74547	7.99229	-4.01024	3.72424	0.336289	-1.00535	-0.313465	-2.22836	-7.44502	-0.613877	-4.17347	2.60956	-7.14276	7.59797	-1.26523	0.521898	0.243	-0.488553	-1.93649	-2.19855	0.650875	-3.31455	0.00944383	9.1414	-1.1901	6.4844	-0.849357	-5.74994	-1.81782	8.37193	-3.20544	2.71159	3.21602	-7.59608	-0.550395	6.81329	-0.315899	-1.40318	-0.407302	3.54271	-12.8343	9.46941	#VALUE!	-0.265013	-6.12373	-5.71141
N-8	-4.64848	8.39327	-3.47512	3.26014	0.327599	-0.274641	-0.0347464	-1.98877	-6.99018	-0.563536	-4.55793	1.51652	-7.86138	8.26465	-1.2262	-0.421582	0.247693	-0.36025	-1.80033	-2.04709	0.60207	-3.48359	-0.394424	9.46515	-2.3451	7.47226	-0.806308	-5.9572	-3.08692	9.35389	-2.73256	2.59444	3.26323	-7.43061	0.0699285	7.32862	-0.17997	-1.92158	-0.978324	3.40736	-11.4773	8.51417	#VALUE!	-0.313222	#VALUE!	-6.62139
N-9	-4.39677	8.58885	-5.06516	4.01138	0.256776	-0.759769	-0.59194	-2.37463	-6.61817	-0.898067	-4.78629	2.8705	-8.95302	8.98086	-1.26413	0.756897	0.105717	-0.690157	-2.28429	-2.58323	0.323472	-3.9748	0.142441	9.56434	-1.75479	7.09175	-1.42254	-5.21822	-2.96088	8.92395	-3.36062	2.94244	2.88902	-7.86445	0.695496	6.91911	0.186607	-1.13273	-0.321235	4.02627	-13.3201	9.74691	#VALUE!	-0.970985	-6.23369	#VALUE!
O-1	-4.22236	7.78228	-3.35255	4.04488	-0.0296723	-1.06723	-0.437134	-1.81919	-5.69695	-0.662555	-3.72723	2.38416	-6.10246	8.35013	-1.005	-0.104642	-0.106544	-0.312896	-2.5823	-2.47275	0.348757	-3.3945	-0.414843	9.48325	-2.11038	6.88019	-1.25914	-7.48688	-3.65704	9.00649	-2.42836	2.19501	3.25634	-7.05285	-0.607168	7.40037	0.592554	-2.26211	-0.680091	3.33042	#VALUE!	2.89962	-10.4549	-0.0471092	-4.58299	-6.27325
O-2	-3.64735	7.81292	-3.07213	4.06769	0.315938	-0.793689	-0.217494	-1.43113	-6.65154	-0.735328	-4.41871	1.47243	-6.08009	7.45134	-0.808493	-0.293171	0.160412	-0.0615754	-2.20988	-1.9119	0.0683149	-3.24356	-0.667206	8.80972	-2.36695	6.10596	-0.421318	-6.37988	-1.81759	7.54985	-2.44574	2.14647	3.30306	-7.17763	-0.0667564	6.51917	0.447205	-1.57196	-0.392089	2.6527	#VALUE!	7.81666	-12.9638	-0.644501	-5.40578	-7.99736
O-3	-4.04153	6.86588	-2.84074	3.83452	0.697137	-1.10955	-0.0549956	-1.80821	-5.81948	-0.278668	-4.30133	0.972991	-6.4639	7.10361	-1.23931	-0.438639	0.679931	0.0738075	-1.85511	-1.66452	0.343265	-3.19627	-1.01423	8.72322	-1.76087	5.56656	0.334098	-5.60578	-2.62565	7.73667	-2.15345	2.41614	3.72331	-6.9034	-0.97234	5.5869	0.142878	-1.11594	-0.46292	2.92594	#VALUE!	7.7504	-12.9621	-0.446517	-5.60653	-6.19432
O-4	-3.52056	7.10698	-2.62091	3.5978	0.207336	-0.678237	-0.227314	-1.40003	-7.55894	-0.782769	-4.55102	2.9191	-5.93116	7.19591	-1.07145	-1.38783	-0.00252535	-0.170579	-1.80035	-1.80037	0.0234555	-3.41104	-0.730933	8.69616	-2.48824	6.34735	-0.601252	-5.99246	-1.93059	8.68123	-2.3434	2.17952	3.01777	-6.95241	-0.296233	6.66078	0.0871967	-1.32284	-0.532816	3.38567	#VALUE!	7.28714	-10.7288	-1.3152	#VALUE!	-6.83212
O-5	-4.19943	8.7646	-3.90254	3.92968	0.16855	-1.0814	-0.182724	-2.15539	-5.71927	-1.38342	-5.03666	2.14582	-6.79665	7.94023	-1.02742	-0.128236	-0.0763803	-0.656224	-2.41722	-2.70058	-0.381307	-3.75386	0.141222	9.09101	-1.93806	6.98352	-1.23517	-4.76156	-2.06864	8.23873	-3.21301	2.80177	2.73976	-7.4774	0.401732	6.98128	0.332315	-1.60481	-0.566744	3.80387	#VALUE!	9.99907	-9.66854	-0.769332	-6.35116	-4.88858
O-6	-3.70448	7.95364	-4.73127	4.02378	0.102685	-1.59236	-0.533767	-2.71529	-6.67648	-1.36458	-5.30203	4.5439	-7.05309	7.2241	-1.29402	0.681338	-0.0884424	-0.7504	-2.32185	-2.25552	-0.518059	-4.35664	0.380065	9.74147	-0.996685	7.20704	-1.1502	-4.97697	-3.1813	8.41326	-3.49265	3.16878	2.55832	-7.56589	-0.455225	7.58088	0.313242	-0.694743	-0.184312	4.06374	#VALUE!	8.62273	-11.4651	-0.120361	-7.51752	-5.91468
O-7	-3.86754	7.93223	-2.99282	3.62328	0.107777	-1.09016	-0.336795	-1.99863	-6.97198	-0.876079	-4.31801	2.31305	-6.74305	7.83122	-1.10109	0.161366	-0.113461	-0.493474	-2.32915	-1.86861	-0.0607353	-3.82119	0.107519	9.34561	-2.22569	6.58256	-0.811961	-5.83187	-2.39201	8.19219	-2.63061	2.63522	2.85683	-6.97268	0.0540122	6.87112	0.130846	-2.09708	-0.76082	3.96068	#VALUE!	1.8257	-9.49653	-0.810676	-10.517	-6.07559
O-8	-3.58045	9.68419	-4.07433	4.05826	0.404288	-1.11081	-0.23592	-1.94855	-6.53452	-0.745895	-4.26276	2.88243	-7.13859	8.10778	-1.30143	-5.81629	0.272561	-0.381233	-2.20525	-2.28261	0.0908398	-3.55713	0.236873	9.57447	-1.56886	7.36104	-0.979876	-6.35596	-2.90657	8.31855	-2.84742	2.81648	3.05797	-7.32455	0.10095	7.35612	0.332175	-1.43063	-0.632037	4.56669	#VALUE!	2.59831	-10.3288	-0.923009	-6.24031	-6.86844
O-9	-3.44876	8.23051	-3.94892	3.9137	0.286394	-1.36964	-0.404312	-2.34768	-6.53537	-1.29171	-4.48886	2.20717	-5.90438	6.82211	-1.11558	1.83969	0.0421608	-0.780549	-2.18749	-2.60798	-0.2603	-4.18862	-0.104941	8.88086	-1.8261	6.86307	-1.07374	-5.19451	-2.71138	8.00433	-3.21163	3.0077	2.72762	-7.42251	-0.0673996	6.67343	0.078925	-0.800066	-0.418739	4.13349	#VALUE!	7.08129	-13.9958	-1.17942	-3.70277	-9.19771
P-1	-4.38794	7.13432	-3.30171	4.02216	0.0203535	-0.948956	-0.655121	-1.84863	-6.22436	-0.400841	-4.02973	1.76715	-5.5745	8.53668	-0.555696	-1.16495	-0.12074	-0.075756	-2.22135	-2.11961	0.262309	-3.87061	-0.323417	9.27787	-2.53345	5.91206	-0.596901	-5.96012	-3.48893	8.53554	-2.85745	2.42048	3.29994	-6.55688	-0.187279	7.0278	0.585016	-2.38129	-0.0799628	3.66447	#VALUE!	3.64499	#VALUE!	-1.25576	-7.34488	-4.82042
P-2	-4.40244	6.87601	-3.35985	3.53194	-0.132534	-1.38216	-0.610569	-2.133	-5.74556	-0.85532	-3.48514	1.47297	-6.23946	8.83562	-1.18662	-0.732114	-0.0837139	-0.238816	-2.16025	-1.94112	0.124358	-3.97433	-0.000866667	9.47982	-1.52769	6.21877	-0.611643	-5.9709	-3.05161	9.36585	-2.74469	2.39389	3.24737	-6.83558	-0.366885	7.03387	0.0130077	-2.12501	-0.863261	4.16765	#VALUE!	4.87956	#VALUE!	-0.587061	-6.46089	-4.90878
P-3	-3.94554	-4.07012	-2.86883	3.52335	0.167878	-1.23129	-0.348989	-1.66615	-4.78931	-0.499622	-3.68857	1.42363	-5.68773	8.05325	-1.11809	-0.344961	0.189327	-0.345406	-2.15562	-1.74731	0.275047	-3.40171	0.369681	9.87301	-1.30299	6.78825	-0.490549	-5.0281	-1.63492	8.85295	-2.6479	3.11757	3.65756	-6.73442	0.290516	7.51095	0.0421082	-2.2591	-0.781408	4.65353	-11.5324	9.25927	#VALUE!	-0.58256	-7.24899	-5.22839
P-4	-2.66377	-5.89982	-2.61548	4.34324	0.619985	-0.498001	0.276322	-1.06386	-5.42972	-0.138141	-3.57776	2.20304	-5.23295	6.52936	-0.489093	-2.01572	0.427966	0.219664	-1.27371	-1.05161	0.439564	-3.08212	-0.905483	8.31321	-2.75947	6.2475	-0.285545	-5.28071	-1.80754	7.1568	-1.83625	2.18932	3.85814	-5.87241	-0.312482	6.87721	0.693015	-0.144894	0.331393	3.51082	-17.1481	2.9231	#VALUE!	-1.86877	-5.98004	-6.19666
P-5	-3.51688	8.17206	-2.45485	3.08452	0.161182	-1.27056	-0.587939	-1.82862	-5.75036	-0.394811	-3.69488	0.884604	-5.14223	7.08677	-1.42085	-0.598758	-0.124094	0.0590542	-2.02216	-1.68365	0.450599	-3.58122	-0.448129	8.95747	-2.25495	6.35312	-0.462438	-6.80934	-3.04071	7.63024	-2.48185	2.48065	3.77896	-6.37969	-0.436235	7.22134	-0.804456	-1.73094	-0.941067	3.5411	#VALUE!	0.0176538	-8.64527	-1.51823	-10.7482	-6.37026
P-6	-3.89462	8.60045	-4.09096	3.55033	-0.117939	-2.10595	-1.23326	-2.40181	-6.12122	-1.17854	-4.13577	2.82881	-7.14265	8.53748	-1.33528	0.947368	-0.34098	-0.786016	-3.02083	-2.66834	-0.110405	-4.29529	0.814234	9.96507	-1.37557	7.1405	-1.4478	-5.60489	-3.67278	8.12601	-3.33935	3.5751	3.05945	-6.35639	0.581475	7.94757	-0.305266	-2.05099	-1.08638	4.54545	#VALUE!	0.704044	#VALUE!	-1.22812	-5.79465	-4.5406
P-7	-3.59221	8.33765	-4.44479	3.62804	-0.286246	-1.65272	-1.14159	-1.62127	-6.7356	-1.21951	-3.98367	2.23138	-7.44072	9.21844	-0.746136	-0.00129422	-0.615561	-0.513369	-2.17878	-2.74697	-0.00861311	-4.15822	0.723801	9.34142	-3.44013	7.72998	-2.14551	-5.91865	-3.4516	9.21072	-3.07577	3.00218	2.79607	-6.41763	1.41032	7.89901	0.381609	-1.97976	-0.567396	4.1731	#VALUE!	0.467103	#VALUE!	-2.03584	#VALUE!	-4.18696
P-8	-3.47978	-4.38247	-3.13797	4.40163	0.473639	-0.894376	-0.352471	-1.58094	-6.11079	-0.364755	-3.17499	1.86705	-6.21263	8.57862	-0.80995	-4.09821	0.266603	-0.180118	-1.93855	-1.76431	0.415024	-3.61203	0.414288	10.1128	-1.35034	7.3279	-1.36305	-5.41354	-2.76012	9.19974	-2.40383	3.61339	3.42285	-6.24067	0.344991	7.55314	0.799689	-1.60896	-0.548888	4.99243	#VALUE!	2.38388	#VALUE!	-0.910329	-6.67768	-4.7677
P-9	-3.29776	-3.38684	-3.49947	4.15242	-0.0318077	-1.53278	-0.676209	-1.83816	-5.95297	-0.719486	-3.93652	2.32733	-5.89974	8.33901	-1.07687	-0.103406	-0.0899164	-0.303135	-2.24294	-2.17692	-0.0688235	-3.77487	0.366971	10.1369	-1.4092	8.04242	-1.29169	-5.01115	-2.93761	9.2585	-3.03406	3.80198	3.15351	-6.32668	0.254051	7.78328	0.439035	-1.67226	-0.470601	4.70645	#VALUE!	3.71317	-12.8558	-1.4049	-5.25444	-5.35549
Q-1	-3.61215	6.61252	-2.49387	2.13956	-0.00725966	-1.93648	-1.49441	-0.904186	-5.51408	-0.225278	-3.14051	1.79801	-5.92808	7.0514	-1.00101	-0.564386	0.231277	-0.298329	-1.88726	-2.86537	0.369072	-4.06691	0.649952	8.33025	-0.910441	6.50335	-0.848072	-6.48171	-0.353853	7.25085	-2.25482	1.38587	3.1344	-6.89788	0.0790853	6.65326	-1.05375	0.117356	0.204662	2.22925	#VALUE!	#VALUE!	#VALUE!	-1.79378	-3.88315	-8.79856
Q-2	-3.25539	7.13967	-2.48488	3.01827	0.250658	-1.75177	-1.28519	-0.762465	-4.52581	-0.157604	-3.10948	0.210114	-6.79223	7.54741	-0.598777	-1.19434	0.229179	0.352156	-2.24689	-2.39031	0.653244	-3.75081	0.154965	8.74331	-1.60984	6.76995	-0.210958	-8.32556	-2.28947	7.95647	-2.07674	0.741051	3.66955	-6.48963	-0.180251	7.64325	-0.354762	-1.00335	0.164616	1.60264	#VALUE!	-1.09887	#VALUE!	-10.0562	-8.33027	-7.94489
Q-3	-3.17787	8.49733	-3.98205	3.0934	-0.0919179	-2.26928	-1.48578	-1.86193	-6.67982	-0.745631	-3.79542	1.62881	-7.36289	8.66351	-0.878639	-5.59172	-0.195418	-0.185928	-2.50301	-3.27395	0.201377	-4.27851	1.19006	9.72029	0.390991	7.77928	-1.27311	-7.01767	-1.80074	8.76054	-3.0172	1.75997	2.96332	-6.33627	1.30643	8.90244	-0.132785	-0.898122	0.397293	3.58062	#VALUE!	#VALUE!	-5.07683	-9.7445	-7.77176	-8.2886
Q-4	-3.91302	7.2222	-2.98061	2.65579	0.152888	-2.2287	-1.54038	-1.21943	-5.38948	-0.0958321	-3.18889	0.697929	-6.18529	7.80505	-1.21194	-0.378582	0.0846357	0.218383	-2.32201	-2.60962	0.682807	-3.72911	0.730359	8.90312	0.0454513	6.3661	-0.479654	-8.18096	-1.50024	8.30836	-2.45452	1.27141	3.61357	-7.11446	0.32121	8.0083	-1.04751	-1.50838	-0.350973	2.54203	-12.4348	-3.27912	-7.16214	-1.81502	-10.0582	-7.11287
Q-5	-3.15934	7.26922	-3.59556	3.00614	-0.00503908	-2.05912	-1.43984	-1.65164	-5.21129	-0.498499	-3.58983	0.299154	-6.8539	7.6825	-0.786529	-0.461851	0.134823	-0.074996	-2.26572	-2.9043	0.147651	-3.78481	0.81062	8.60265	-1.13756	7.2068	-0.540155	-6.09792	-1.26204	7.91499	-2.68427	1.66721	3.13428	-7.05633	0.305451	7.38846	-0.588733	-0.6644	0.156587	2.64713	-13.8355	#VALUE!	-6.10204	-3.55522	-6.10231	-6.88508
Q-6	-3.36007	7.80516	-4.00683	3.71696	0.435687	-1.81143	-1.18439	-1.3091	-4.97987	-0.16565	-3.36458	0.107385	-6.83913	8.16838	-0.255077	-12.6011	0.515976	0.177426	-2.43925	-2.49801	0.88694	-3.61758	1.15811	9.80949	0.740932	7.64405	-0.416558	-6.66157	-1.49192	8.37934	-2.69195	1.6171	3.42118	-6.82699	0.92287	7.86391	0.361235	-0.982658	0.324033	3.44758	#VALUE!	#VALUE!	#VALUE!	-3.99956	-6.08173	-7.31451
Q-7	-2.64994	-4.78504	-2.85511	2.07417	-0.129234	-1.88778	-1.371	-1.51353	-4.25861	-1.07457	-4.20587	3.59701	-6.42188	7.26015	-0.93031	1.24059	-0.022859	-0.932439	-2.24247	-3.17936	0.114568	-4.84864	1.79317	8.74909	1.3639	7.93787	-1.28166	-4.25646	-0.428722	7.83644	-3.13792	2.85684	2.08644	-7.9492	1.4372	7.20531	-1.03516	0.682257	0.292699	4.87005	-14.4168	7.94847	-3.92451	0.0771379	-1.58207	-6.71702
Q-8	-3.20122	8.36415	-3.44474	2.94962	0.211831	-1.86883	-0.874489	-1.55663	-4.98802	-0.412634	-3.41077	1.30605	-6.95164	5.04237	-0.672959	-5.16455	0.226654	0.0561127	-2.24868	-2.69937	0.357079	-3.49943	0.901675	9.49098	-0.944196	8.01671	-0.8522	-6.37195	-2.27265	8.73798	-2.69792	1.63747	3.21284	-7.49376	1.37856	8.14139	-0.590013	-1.18644	-0.0244409	3.39606	#VALUE!	-0.113938	#VALUE!	-4.43424	-5.14389	#VALUE!
Q-9	-2.01267	-4.73122	-2.68415	3.26554	0.707578	-1.44465	-0.453071	-1.08881	-4.43877	0.537334	-2.82852	1.80934	-5.77208	6.29192	-0.459555	-9.68909	0.779817	0.347089	-1.90039	-2.38115	0.851156	-2.88894	0.871198	9.87843	-0.541918	7.97288	-0.0936873	-6.33947	-1.09049	8.29432	-2.18454	2.33772	3.97275	-6.15924	0.466024	8.36248	-0.5635	-0.0320339	0.542486	2.48988	#VALUE!	#VALUE!	-1.00271	-6.38234	-6.29208	-7.22767
R-1	-3.28813	-14.7758	-3.0883	3.22195	0.609197	-1.53108	-0.84664	-1.24794	-5.0902	0.49835	-2.86178	1.50601	-5.54742	7.34132	-0.48958	1.31095	0.665833	0.759608	-1.8594	-2.13122	1.05966	-3.5327	1.84115	9.79344	0.44756	7.97867	-0.378915	-5.70089	-1.15594	9.00148	-2.27449	2.13633	3.46996	-6.86749	1.08874	5.5962	0.0995123	-0.179494	0.918953	3.50256	#VALUE!	-5.60117	#VALUE!	0.225662	-3.10566	-4.85384
R-2	-3.0816	-3.62914	-3.14105	3.44867	0.742686	-1.02262	-0.922666	-1.46423	-4.65043	0.888556	-2.68789	1.00743	-5.42688	-4.73066	-0.416598	1.0015	0.905218	0.872782	-1.82348	-2.15463	1.32945	-3.16011	0.929493	9.30707	0.397069	7.92769	0.156366	-6.63333	-1.07315	9.10165	-2.03877	1.55846	4.07883	-7.79819	1.13634	8.0409	0.130195	0.0410937	0.155166	2.69882	#VALUE!	#VALUE!	#VALUE!	0.155601	-4.62808	-7.40795
R-3	-3.80368	8.57763	-4.01145	2.3932	-0.166848	-2.06992	-1.86351	-2.70797	-7.03901	-0.761711	-4.16525	1.20949	-6.76974	7.3325	-1.68481	1.54548	-0.195111	-0.363805	-2.56125	-2.73339	0.144442	-4.7208	0.917612	9.42733	0.374436	8.30286	-1.16502	-4.57715	-1.19124	8.42222	-3.49938	2.07138	2.55299	-8.52844	0.982629	7.64193	-0.755374	-0.365127	-0.209465	4.01333	#VALUE!	3.50358	-3.61607	0.0968772	-5.046	-6.00326
R-4	-2.86453	-6.11714	-2.40733	4.02185	1.0815	-0.782137	-0.330371	-1.26952	-5.30497	0.612162	-2.69205	1.09743	-4.93768	7.38584	-0.440255	-14.8986	1.1154	0.967053	-1.5786	-1.40379	1.25133	-3.28006	0.809206	9.3972	0.325553	7.44363	0.275848	-4.83794	-0.662882	8.53935	-2.10676	1.6182	4.13275	-7.03661	0.579787	7.71496	0.542761	0.408943	0.873476	2.75696	-13.8522	0.977554	-9.02987	-0.602117	-3.50848	-5.45564
R-5	-3.27348	-4.68551	-3.54046	3.76292	0.465732	-1.28349	-0.951929	-2.10837	-6.16396	-0.03355	-3.23613	1.257	-5.49019	1.40316	-0.606546	1.26782	0.732624	0.18024	-2.40479	-2.89931	0.518129	-4.19445	1.58504	9.90171	1.14241	8.75104	-0.942881	-3.8123	-0.800716	8.47336	-3.0122	2.62311	2.97605	-7.38369	1.48658	5.95006	0.690054	-0.0336811	0.316798	3.37381	#VALUE!	8.53387	-9.09453	-0.200882	-2.77412	-5.18699
R-6	-2.23469	-13.107	-4.06681	4.02409	0.544067	-1.26998	-0.76453	-1.34461	-5.86091	-0.572601	-3.58476	2.33777	-6.49902	7.63352	0.0792811	1.26716	0.748539	-0.155993	-2.38919	-2.95153	0.235459	-4.33603	1.79674	9.45924	1.26545	8.11318	-1.18129	-4.41902	-0.808463	8.13218	-3.05249	2.45111	2.5876	-7.4605	1.20811	8.13575	0.860931	0.749305	0.687635	3.74227	#VALUE!	1.61145	#VALUE!	-0.0688623	-2.23973	-5.96795
R-7	-3.93782	-6.6636	-3.25507	3.37928	0.392389	-1.33103	-1.07679	-1.48647	-5.48854	0.0538114	-2.97137	0.848786	-6.84584	7.4918	-0.261968	0.798024	0.557121	0.184017	-2.09123	-1.90799	0.964822	-3.73737	1.0834	9.19827	0.0455228	7.75353	-0.466529	-5.52656	-0.457617	7.94897	-2.48506	1.74485	3.53395	-7.6824	1.0084	7.4072	-0.00482281	-0.10376	0.57412	2.81356	#VALUE!	2.08739	-7.88497	0.00677613	-3.76235	-5.40667
R-8	-3.12742	-4.62942	-3.22145	3.3195	0.285193	-1.20801	-0.978641	-2.51994	-5.29915	-0.665442	-3.21293	2.21759	-5.606	8.23377	-1.23836	0.0193274	-0.0799656	-0.258938	-2.7003	-2.38521	0.500554	-3.74317	0.364591	9.16239	-0.209014	8.59821	-0.954651	-5.16621	-1.98014	8.41234	-3.09945	2.63113	3.06443	-7.49419	0.934902	8.45598	-0.577297	-0.500295	0.605262	4.05043	#VALUE!	-2.90226	-2.21402	-2.0572	-4.14535	-6.0179
R-9	-3.15344	7.45668	-3.7262	2.81407	0.0121206	-1.55245	-0.983589	-2.19818	-4.85729	-0.530134	-3.16879	0.991149	-6.07014	3.95593	-1.24196	-0.745791	0.299819	0.241055	-2.20984	-2.19673	0.27808	-3.58206	-0.011275	8.71946	-0.921423	7.71665	-0.649344	-5.16203	-2.02333	8.49733	-2.7499	1.78528	3.19982	-7.96492	0.326438	7.7069	-0.656233	-0.613247	-0.0065482	2.97406	#VALUE!	#VALUE!	-6.46654	-2.53774	-4.82103	-7.78584
S-1	-4.17131	8.0517	-3.6591	2.09532	0.103684	-1.7962	-1.40855	-2.00478	-4.17876	0.0631282	-3.61919	0.609625	-5.90958	7.3011	-1.37878	0.427633	0.244661	-0.617832	-2.34425	-2.39353	0.162789	-4.28062	0.578229	9.04452	0.367311	7.07196	-0.68097	-6.63516	-1.2967	7.9464	-3.53028	1.31347	2.94404	-6.98822	0.135409	7.44275	-1.30664	-0.523432	-0.303978	3.12414	#VALUE!	#VALUE!	-8.41277	0.0109548	-4.88228	-5.9852
S-2	-4.99227	-14.8897	-2.74771	2.58083	0.681035	-0.943909	-1.05544	-1.93943	-4.29227	0.127917	-3.09879	2.28552	-6.49323	8.28081	-1.36278	1.61942	0.294277	-0.325332	-1.87066	-2.02639	0.501146	-3.86979	1.50522	9.85877	0.701813	8.69342	-0.361917	-4.30283	-1.23467	9.38292	-3.33715	2.16722	3.4366	-7.15741	1.02758	8.22319	-1.05682	0.411289	0.26023	5.31923	#VALUE!	2.23287	#VALUE!	0.338194	-6.4691	-6.52403
S-3	-4.27294	-4.61072	-2.87412	2.61594	0.502357	-0.84572	-0.979984	-1.48996	-6.00889	0.357344	-3.56512	1.62094	-6.45007	6.80333	-0.941748	1.12879	0.664171	-0.539176	-1.77078	-2.52197	0.226408	-4.27935	0.833489	8.83143	0.78446	7.72466	-0.428535	-5.12534	-0.415053	7.64018	-3.18731	1.93231	3.20381	-7.21054	1.25601	7.77279	-0.663747	0.393483	0.181785	3.7074	#VALUE!	-1.57727	-5.14875	-0.322583	-3.56108	-7.09889
S-4	-4.37352	7.33303	-2.94936	1.8509	0.186598	-1.67706	-1.11899	-1.98599	-5.14752	-0.23072	-3.52431	1.53019	-6.32501	7.07436	-1.57212	0.39017	-0.027011	-0.517906	-2.39085	-2.1208	0.0300256	-3.9005	0.406735	8.9898	0.467768	7.36884	-0.512784	-5.22155	-2.28411	8.13887	-3.10845	1.40269	3.30484	-7.13416	-0.0132321	7.55553	-2.02306	-0.922905	-0.696601	3.74818	#VALUE!	4.21464	#VALUE!	-1.17995	-6.22799	-8.01998
S-5	-3.92212	-5.15152	-2.67771	2.29881	0.154385	-1.75576	-1.23359	-1.60939	-4.97839	0.24457	-3.10418	1.56488	-5.78662	7.59077	-1.09429	0.831683	0.599526	-0.31084	-2.55871	-2.28746	0.20702	-4.06891	1.53907	9.27674	1.05852	7.98689	-0.53127	-5.94672	-0.479397	8.39703	-3.06036	1.68916	3.34973	-6.65684	1.12683	7.90445	-0.988401	-0.335517	-0.312083	3.03001	#VALUE!	8.48913	-9.48996	-0.047479	-4.2491	-5.94913
S-6	-4.4397	-4.37734	-3.17897	2.716	0.344378	-1.65341	-1.44238	-1.96501	-6.18144	-0.0306199	-3.39923	2.24012	-6.03407	7.79259	-1.00015	1.78629	0.778086	-0.557712	-2.45875	-2.78924	0.0853507	-4.68431	1.68122	9.63465	2.0258	8.28268	-1.26178	-4.3129	-1.33367	8.52914	-3.67748	2.29468	2.96245	-6.90375	1.09642	5.22466	-0.116749	-0.223769	0.142316	4.40558	-10.4528	8.17506	-6.36488	0.0579358	-3.0145	-5.15267
S-7	-3.95857	-4.4228	-2.91356	2.34227	0.413744	-1.87075	-1.68491	-2.18507	-5.4327	0.0669809	-2.90223	0.604658	-6.55146	7.74879	-1.22865	1.0804	0.491994	-0.363704	-2.57276	-1.95291	0.561121	-4.01524	0.969721	9.5857	0.802865	7.86642	-0.127751	-5.42306	-0.851778	8.38049	-3.02151	1.96785	3.51915	-6.44258	1.01497	8.92512	-1.18165	-0.35165	-0.115908	3.22896	#VALUE!	-3.4762	-4.72226	-0.0809558	-6.93187	-5.62613
S-8	-2.76701	-11.085	-3.14128	3.14678	0.843611	-0.824239	-0.624256	-1.7858	-5.2725	0.278313	-2.97171	2.68134	-4.86893	-1.55091	-0.916494	0.341603	0.244102	-0.384968	-2.26083	-1.68854	0.858494	-3.53102	1.45757	10.1903	0.0600746	9.07744	-0.269064	-4.63542	-2.33171	9.09795	-2.73726	2.98177	3.82915	-6.49418	1.10506	9.48283	-0.998504	0.241216	0.521229	4.70071	#VALUE!	-0.741209	-3.1979	-7.05027	-5.12078	-6.21561
S-9	-3.03276	7.56307	-2.80505	2.65649	0.233773	-1.30865	-1.24838	-1.32507	-4.57065	0.077958	-3.21426	1.52008	-5.67448	3.27625	-0.776443	-8.88695	0.643181	-0.108971	-2.05722	-2.15951	0.280822	-4.05627	0.981465	8.89084	0.0576081	8.41794	-0.557873	-5.83146	-0.716193	7.87144	-2.86792	1.83255	3.48492	-7.1629	1.00999	7.55652	-0.823781	-0.520022	0.115518	3.23439	#VALUE!	-2.14848	-2.41267	-1.98413	-4.43745	-7.45221
T-1	-4.02986	8.52326	-3.15227	2.32592	-0.0234129	-1.69805	-1.78443	-1.57483	-4.93653	0.23547	-3.23706	0.298857	-6.98908	8.16336	-1.20408	0.370194	-0.0273687	0.561646	-2.81732	-2.24256	0.782674	-3.49512	-0.0405111	8.96525	-0.912329	7.43484	-0.0578385	-7.60742	-2.50924	8.38086	-2.57644	0.760861	3.59622	-6.64772	0.36271	7.97951	-1.35242	-1.10496	-0.495371	1.7746	#VALUE!	#VALUE!	-5.70756	-0.894353	-8.11315	-6.72211
T-2	-3.96016	-2.54211	-3.06408	2.22009	0.350658	-1.08277	-1.31312	-1.50497	-4.52063	0.206118	-3.23802	1.64535	-6.38658	7.1024	-1.33102	1.24826	0.228545	0.0778716	-1.77299	-2.23863	0.516334	-4.13553	0.60588	8.99945	-0.0917839	7.58748	-0.428874	-5.49597	-1.24376	7.65191	-2.65696	1.55207	3.52953	-6.85528	0.513846	7.6334	-0.984686	-0.342605	-0.109834	3.63118	#VALUE!	-1.33919	-3.31319	-4.83655	-7.94797	-8.39157
T-3	-3.86149	7.88454	-3.58703	2.04157	0.254546	-1.87251	-2.10827	-2.74628	-6.16622	-0.557692	-3.87122	1.72488	-6.90954	7.20015	-1.92849	0.808634	-0.373683	-0.544413	-2.41359	-2.81224	0.0343278	-4.67479	0.938552	8.94843	0.288881	7.87165	-0.935394	-4.87562	-0.725541	7.84603	-3.67117	2.30561	2.65628	-7.88281	0.859155	7.92903	-1.47168	-0.178767	-0.163525	4.73969	#VALUE!	3.93067	-4.72185	-1.1181	-7.34186	-6.88513
T-4	-3.04489	-1.027	-2.83843	4.08478	1.02999	-1.09642	-0.427133	-1.00618	-4.27797	0.867645	-2.87486	1.29777	-5.66244	-2.03299	-0.0629532	-7.64227	1.54009	0.837165	-2.52739	-1.7769	0.840848	-3.94021	1.86893	10.5398	0.654289	8.1608	0.207029	-4.22688	-2.74405	8.89941	-2.48814	2.1384	4.01938	-6.93061	1.18525	4.03706	0.961967	-0.177313	0.00721193	3.62725	-8.60835	0.899554	-3.5337	-7.37524	-6.09629	-4.89699
T-5	-5.15409	8.23743	-3.44984	2.81262	0.0241988	-2.15247	-1.63549	-2.21995	-5.90068	-0.406131	-4.12339	1.39236	-7.76921	7.64482	-1.26482	1.03616	0.313683	-0.559185	-2.63819	-2.81208	-0.362261	-4.69327	1.31744	9.55833	0.613595	7.70554	-0.933469	-4.8453	-1.56546	7.81282	-3.55634	1.63253	2.53328	-7.2342	0.544534	7.58051	-0.352747	-0.25001	-0.27406	3.39277	-10.7359	-1.81981	#VALUE!	-0.744607	-4.33751	-5.82623
T-6	-3.43882	-3.07309	-3.71217	2.81879	-0.260125	-1.88664	-1.84124	-2.00281	-7.42358	-0.585513	-3.97947	2.39474	-6.66198	7.57149	-0.868498	1.46289	0.0124316	-0.598955	-3.17599	-2.91235	-0.0558048	-4.97472	2.22056	10.129	1.90017	8.55128	-1.43141	-3.92581	-1.54008	8.40339	-3.57532	2.73283	2.09998	-7.18097	1.55109	7.84152	-0.413155	0.339637	0.300469	5.18824	#VALUE!	0.0820345	-9.01377	-0.208451	-2.83136	-5.67893
T-7	-3.08497	-2.21046	-3.07638	2.89094	0.61586	-1.32157	-1.18593	-1.73994	-6.09598	0.141725	-2.79864	2.51393	-5.98092	1.52544	-1.33824	-6.31289	0.341359	0.316295	-2.68412	-1.88117	0.569239	-3.73878	1.28623	9.60928	0.984338	8.88197	-0.333569	-3.74445	-1.9961	8.91876	-2.69899	2.80932	3.43487	-6.79868	1.6575	8.28287	-0.783113	0.497176	0.447876	4.07992	#VALUE!	-1.55901	-6.42171	-0.729264	-5.03406	-4.99908
T-8	-3.13888	-4.40457	-3.99208	3.26231	0.333008	-1.34012	-0.848868	-1.65077	-4.83714	0.283517	-3.151	2.29873	-7.29636	2.06355	-0.943927	0.781285	0.527666	-0.27889	-2.57072	-2.58582	0.703922	-3.54226	0.943615	10.4901	0.0861158	8.28178	-0.862835	-5.72729	-1.29893	9.17625	-2.64782	2.43061	3.29388	-6.87364	1.36148	9.21778	-0.0982731	-0.749374	0.017741	3.28625	#VALUE!	#VALUE!	-4.35249	-15.1795	-3.47448	-5.466
T-9	-2.25669	9.14928	-3.72145	4.64607	0.717225	-1.0516	-0.266292	-1.36013	-4.93296	0.286903	-3.14776	-4.19886	-6.32459	-8.17382	0.259655	-4.69271	0.883187	0.758103	-2.86679	-1.55323	0.951123	-3.19549	1.99986	11.2927	0.84593	9.13272	-0.26804	-5.0617	-2.22449	9.57586	-2.87139	2.4861	3.72328	-6.15739	1.31345	1.98326	1.01152	-1.48436	1.3865	3.40702	#VALUE!	-6.95003	#VALUE!	#VALUE!	-2.97575	-3.91168
U-1	-3.96841	7.85412	-3.78088	3.17345	0.252407	-1.7131	-1.50075	-2.25255	-6.16921	0.121175	-3.52335	0.996219	-6.23842	8.36674	-0.986454	0.176613	0.116602	0.167769	-2.29498	-2.68756	0.896545	-3.68258	0.370128	8.7753	-0.883907	6.15632	-0.199402	-8.13429	-2.78983	8.93011	-2.50942	0.320534	3.64387	-8.09435	1.20409	7.95366	0.0483723	0.505032	0.0073715	1.373	#VALUE!	-12.3252	#VALUE!	-6.35774	#VALUE!	-5.66874
U-2	-3.16092	-2.17036	-4.04478	3.26468	0.571803	-1.14511	-0.983671	-2.73288	-6.66063	-0.29255	-4.17719	1.81597	-6.25772	8.04135	-0.887784	1.06643	0.397078	-0.507309	-2.12498	-2.24556	0.220973	-4.38413	0.738023	9.17744	-0.758256	8.01182	-0.484921	-4.45048	-1.15959	8.13398	-3.57462	1.6642	2.83005	-7.9449	1.3247	8.31242	-0.0486356	-0.181617	0.831727	3.97595	-9.77533	1.32979	#VALUE!	-0.613396	-5.54454	-8.19789
U-3	-2.87154	-5.30079	-3.96683	3.69782	0.602729	-1.11761	-0.740391	-1.92926	-4.89915	-0.713679	-3.36433	1.04109	-5.93918	7.28238	-0.479499	0.726222	0.591743	-0.7836	-2.14915	-2.21448	0.121823	-4.25924	1.1248	9.13106	0.502774	7.77998	-0.525742	-4.13818	-0.443325	7.81095	-3.54303	2.01172	2.86554	-8.47758	1.11283	7.68612	0.231781	-0.169697	0.5125	3.19242	#VALUE!	1.22903	-6.5611	-1.05507	-4.36858	#VALUE!
U-4	-3.39586	7.2596	-3.95151	2.01636	0.545508	-1.43587	-0.930522	-2.03842	-5.13718	-0.604938	-4.00809	0.931887	-5.46416	7.01002	-1.33516	0.482516	0.051242	-0.808148	-2.60122	-1.87271	0.260471	-3.82969	0.44736	8.84506	-0.776525	7.53789	-0.0544864	-4.84576	-2.10972	7.43332	-3.1669	1.63461	3.29468	-7.70652	0.00841975	7.6318	-1.47466	-0.16066	-0.79105	3.109	#VALUE!	1.38878	#VALUE!	-2.03288	-5.17359	-6.59475
U-5	-3.44418	7.52539	-3.56811	2.23191	0.566049	-2.07712	-0.960999	-2.26817	-6.13731	-0.760418	-4.66471	1.66372	-6.30013	7.34088	-1.54353	0.991669	-0.187073	-0.928266	-2.92279	-2.46548	0.278205	-3.78254	0.864612	9.12353	-0.54023	7.57241	-0.477291	-4.63926	-1.76297	7.54819	-3.7628	1.87923	3.04486	-7.66676	0.780353	8.09588	-1.36016	-0.572562	-0.374066	3.66003	#VALUE!	1.17711	#VALUE!	-0.723484	-5.77089	-5.53482
U-6	-2.92353	-3.11112	-4.92011	3.03839	0.550265	-1.96921	-1.15892	-2.57985	-6.21873	-1.24825	-4.18617	2.1656	-5.72887	8.09335	-0.868723	1.33972	0.0087775	-0.580978	-2.85965	-1.69439	0.343751	-4.26375	1.33089	9.85346	0.385272	8.28692	-0.401934	-3.89276	-1.6583	8.04732	-3.75616	2.60769	2.95116	-8.24335	1.06918	8.41538	-0.318078	-0.291157	0.203226	4.18364	#VALUE!	-6.2207	-5.00522	-5.0975	-7.74511	-6.16482
U-7	-3.28016	9.01653	-4.14397	2.6578	-0.0745892	-2.4451	-1.37814	-1.97231	-4.79094	-0.825817	-3.78562	2.12449	-5.68928	2.19062	-1.01709	1.70087	-0.199248	-0.877816	-3.13566	-2.39338	0.331079	-3.70972	1.56529	10.0143	0.290324	3.27703	-0.931507	-4.41968	-2.28622	8.42664	-3.39943	2.5279	3.0719	-7.8494	1.15308	8.8881	-1.08909	-1.41082	0.303841	3.56519	-9.72992	#VALUE!	-6.22495	-3.53351	-4.98942	-6.77136
U-8	-2.82172	-3.90903	-3.68971	2.89007	0.67594	-1.8266	-0.916468	-2.22243	-6.0228	-0.889214	-4.3738	2.60727	-6.05671	8.24515	-0.634752	2.00597	0.107154	-0.836111	-2.50773	-2.45034	0.00438545	-4.11387	2.0076	10.3898	-0.315555	8.61511	-0.621024	-4.09165	-2.00365	8.43496	-4.07552	2.50453	2.62542	-7.6373	1.21656	6.27975	-0.616957	-0.506546	-0.0103719	4.54023	#VALUE!	3.21831	#VALUE!	-6.26022	-6.66756	-6.12863
U-9	-3.47704	8.99795	-5.2249	3.29806	0.2019	-1.78672	-0.870113	-1.80693	-5.8737	-0.47268	-4.06573	0.792973	-7.00663	8.98994	-0.52089	-3.18685	0.040942	-0.356098	-2.53561	-2.55559	0.378509	-3.46784	1.32872	10.5765	-0.724291	3.2549	-0.913369	-5.91966	-3.36371	9.73353	-2.8344	1.84879	3.238	-7.51803	1.36425	9.37645	0.24159	-2.12638	0.169444	2.77476	#VALUE!	0.590143	#VALUE!	#VALUE!	-5.75375	-5.50957
V-1	-3.26772	7.58015	-2.60135	3.38317	0.634217	-0.781987	-0.390956	-1.1034	-5.32728	0.748408	-3.19968	-0.380407	-5.00531	7.54883	-0.632273	-12.7946	0.591023	0.974359	-1.4708	-2.26039	1.42214	-2.67044	-0.0722784	8.96049	-1.15627	6.66361	-0.0570611	-8.86728	-1.74512	8.46061	-1.74483	0.79004	4.32339	-6.56107	0.383944	7.87919	0.258616	-0.678642	0.5798	1.58712	#VALUE!	2.07239	-9.99623	-1.38801	-4.52663	-6.60595
V-2	-3.20989	6.93716	-3.19088	2.83936	0.327913	-1.20877	-0.62982	-1.81127	-5.07651	0.0515045	-3.64797	0.0266594	-5.84863	6.77156	-0.937027	-0.41365	0.223538	0.244725	-1.9307	-2.14228	0.570493	-3.35174	-0.335035	8.4287	-1.87502	6.74352	-0.298324	-5.6207	-1.89056	7.47262	-2.4225	0.723776	3.59513	-7.21458	-0.135319	7.51074	-0.258582	-0.612162	-0.0994935	1.694	#VALUE!	-5.80259	-8.78902	-1.52158	-4.80709	-6.62749
V-3	-3.03749	-4.76657	-3.42647	2.41081	0.494369	-1.01729	-0.256716	-1.74237	-5.22864	-0.511399	-3.87302	0.796538	-5.36228	7.16589	-1.40315	0.21526	0.11094	-0.393473	-1.511	-2.47524	0.270494	-3.49211	0.815763	8.299	0.0512393	7.75783	-0.548535	-4.60521	-0.0116725	7.46956	-2.80831	1.53761	3.16894	-5.57084	0.819975	7.52945	-0.725732	0.293343	0.328333	3.23215	#VALUE!	4.93416	#VALUE!	-1.44908	-4.69356	-8.37819
V-4	-3.87671	7.6034	-3.46837	2.42802	0.283522	-1.49095	-0.97535	-2.26029	-5.37684	-0.29637	-3.75081	0.813806	-5.86929	6.84643	-1.5908	0.246903	0.0638613	-0.369784	-2.28382	-2.43952	0.298671	-3.60864	0.024086	8.46769	-0.537271	6.75829	-0.730164	-4.78178	-1.11014	7.26271	-2.83758	1.60066	3.45356	-7.06341	0.164957	7.62484	-0.78052	-0.620245	-0.16179	2.33903	#VALUE!	-0.449155	-8.52258	-1.3201	-4.39757	-7.11821
V-5	-3.67212	7.53863	-4.49139	3.3929	0.705525	-1.07662	-0.669498	-2.46295	-6.58207	-0.504868	-3.92314	0.689589	-6.29504	8.08461	-0.884163	-7.71097	0.499431	-0.250438	-1.96161	-2.66393	0.218763	-4.03754	1.24505	9.87282	0.745062	7.50797	-0.666934	-4.09137	-1.08019	8.39577	-3.07392	2.02517	3.15324	-7.18038	0.462981	5.3919	0.24685	-0.38103	0.336602	3.14732	-11.4066	-5.17254	-6.28843	-0.607097	-5.19757	-6.37925
V-6	-4.02127	8.90105	-4.15468	2.66032	0.107758	-1.69775	-1.73651	-2.75012	-6.00507	-0.6269	-3.95411	1.70232	-7.91119	8.1956	-1.42467	-0.289078	-0.169087	-0.446712	-2.74584	-2.70899	-0.0189508	-4.06719	0.64799	8.98312	-0.277214	7.74513	-0.724248	-5.10931	-2.01224	8.60157	-3.36719	1.74703	2.90015	-7.67231	1.10096	8.28389	-0.630724	-0.45049	0.156611	3.23834	#VALUE!	-5.65601	-6.12832	-5.53539	-8.44434	-5.83238
V-7	-3.7127	7.62124	-3.40143	2.57459	0.555103	-1.53321	-1.05833	-2.0282	-5.65716	0.0108597	-3.31184	0.699906	-6.18853	4.50707	-1.26611	-0.546079	0.269113	0.146534	-2.29191	-2.50493	0.811158	-3.34603	0.401537	9.23632	-0.440812	7.13487	-0.4359	-6.09739	-2.50357	8.34591	-2.58165	1.22796	4.00271	-7.00276	-0.371696	7.73222	-1.20471	-0.194256	-0.171168	2.57328	#VALUE!	-15.0317	-7.74387	-3.90871	-6.23826	-6.9533
V-8	-4.07903	8.91447	-4.18126	2.04118	0.298818	-1.60536	-1.45895	-2.67703	-5.86002	-0.690324	-4.60674	1.38396	-6.84972	3.16281	-1.73566	1.27619	-0.0330556	-0.846545	-2.72822	-3.11986	0.247407	-3.90085	1.61233	9.73735	0.157456	8.14397	-1.3249	-5.35498	-1.37559	8.97626	-3.09892	2.10575	2.93066	-7.53157	1.21844	8.37822	-0.879085	-0.898755	-0.263578	4.51471	#VALUE!	2.56156	#VALUE!	-9.3386	-11.6804	-6.85137
V-9	-3.3883	7.8415	-3.87437	3.58857	0.474631	-1.5022	-0.944506	-2.4874	-5.92588	-0.218784	-3.87621	1.0966	-5.99194	7.68484	-0.953268	-5.27986	0.434321	0.00635886	-2.66763	-2.56505	0.319744	-3.88313	0.572836	9.63036	-0.324036	7.55105	-0.613129	-6.46402	-2.90485	8.31021	-3.00299	1.32462	3.39509	-7.44401	0.231812	8.46601	0.464264	-0.179415	0.431353	2.6668	#VALUE!	1.4375	-5.96969	-4.52693	-6.81113	-5.76759
W-1	-4.80675	8.03062	-2.75297	2.57494	0.44961	-0.442708	-1.03728	-0.889533	-4.50394	0.896025	-2.19725	-0.177302	-4.65274	8.69494	-0.86419	-8.82335	0.403155	0.880986	-1.94366	-1.83232	1.68504	-2.50878	0.223192	8.96681	-1.19455	6.19005	0.197564	-10.0031	-2.74044	9.05761	-2.05218	0.877854	4.04849	-6.87947	0.606935	7.98377	-1.44857	-1.38451	-0.277771	1.64583	#VALUE!	2.80206	-9.4544	-0.744023	#VALUE!	-6.54792
W-2	-4.50139	7.33105	-3.56017	1.88215	-0.0221771	-1.33826	-0.881695	-1.44224	-5.00161	0.0393755	-3.39174	0.0863862	-5.34049	8.12816	-1.56739	0.597052	-0.111711	-0.0788884	-2.09735	-2.60277	0.87024	-3.28035	-0.0187116	8.85717	-0.934149	7.29348	-0.710749	-6.09144	-1.65526	8.46355	-2.39467	0.921078	3.06075	-6.9376	0.202562	7.79926	-2.15163	-0.815907	-0.703364	2.09943	-10.7184	-0.199755	-9.30783	-0.879514	-5.41775	-7.22167
W-3	-4.02383	8.08627	-4.3433	2.03143	0.0549805	-1.89712	-1.36188	-2.18336	-5.24567	-0.505388	-3.9967	1.40327	-6.51103	7.79155	-1.3853	0.552396	-0.205244	-0.842813	-2.07818	-3.10906	0.180285	-4.05097	0.849089	9.02448	0.0591711	7.82151	-1.17712	-4.89236	-1.28827	8.84602	-3.34045	1.62671	2.28662	-7.03689	0.861762	7.88799	-1.71801	-0.838536	-0.34379	3.01174	#VALUE!	0.429817	#VALUE!	-0.977716	-4.36995	-5.37645
W-4	-4.02452	7.78366	-3.79703	2.08586	0.0114657	-2.11221	-1.10811	-2.14893	-5.71373	-0.431824	-3.84084	1.15366	-5.74758	7.53731	-1.56298	0.563033	-0.0656292	-0.641788	-2.32713	-2.7178	0.474631	-3.56692	0.491352	9.29396	0.0491465	7.47276	-0.549375	-6.01884	-1.38633	8.23376	-3.00596	1.59078	2.72943	-6.99199	0.132982	7.98434	-1.65275	-0.5317	-0.492764	2.84861	-11.5067	-6.57692	#VALUE!	-1.1206	-5.09018	-6.39974
W-5	-4.53308	7.91194	-4.83509	2.80962	0.0480854	-1.89647	-1.02735	-2.37819	-6.35615	-0.676361	-3.72724	1.30407	-6.62843	7.82214	-1.29274	0.812791	0.0869564	-0.640863	-2.79808	-2.87357	0.388485	-4.23636	1.35003	9.77625	1.20222	7.46411	-0.930349	-5.34682	-1.30345	8.53485	-3.54584	1.69737	2.54671	-7.09006	0.227947	5.62606	-0.731018	-0.277249	-0.146864	3.66198	#VALUE!	2.81007	-5.87799	-0.305116	-4.44605	-5.63487
W-6	-4.10704	9.16675	-3.54183	2.47192	-0.320178	-2.15368	-1.67867	-1.64244	-5.62748	-0.622454	-3.46536	1.58487	-5.95965	8.50651	-1.30649	-7.23287	-0.333566	-0.342716	-2.70215	-2.82729	0.548755	-3.8109	1.18543	9.8493	0.373756	8.53848	-0.802258	-5.86585	-2.97132	9.30518	-3.0634	1.81846	2.75367	-7.65469	1.3682	8.67594	-1.30818	-0.875281	0.258152	3.81035	#VALUE!	-8.39486	#VALUE!	-1.61846	-7.63027	-4.98579
W-7	-3.76614	8.78678	-4.03704	3.39594	0.349302	-0.773903	-0.836505	-1.59042	-6.93998	0.304192	-3.20379	1.42627	-6.34752	1.05808	-0.34551	-13.4957	0.317546	0.0153285	-2.10728	-2.59608	1.28968	-3.51379	1.53052	10.0619	0.533562	8.6714	-0.876237	-6.55875	-0.594118	9.96796	-2.47321	1.57789	3.08315	-6.57372	1.73198	8.99106	-0.255959	-0.587643	0.561875	3.81888	#VALUE!	-8.09765	-5.5103	-3.30903	-9.01717	-5.55227
W-8	-3.91135	8.79069	-4.12056	2.14864	-0.206594	-2.40989	-1.77555	-2.80095	-5.95423	-1.32002	-4.3019	2.70897	-8.0283	7.51755	-1.42528	1.50372	-0.356404	-1.2206	-3.09664	-3.37627	-0.240679	-4.78635	1.53419	9.27578	0.920254	8.65379	-1.78475	-5.30152	-0.781293	8.59834	-3.82326	2.73093	1.76006	-8.11773	1.77892	8.14212	-1.72323	0.120173	-0.249132	4.92834	#VALUE!	4.8439	-0.148511	-0.881171	-6.04197	-5.26735
W-9	-3.30135	8.20094	-4.03076	3.9304	0.902737	-1.08461	-0.54478	-1.84272	-5.40889	0.336693	-3.21528	0.41789	-7.01081	3.41896	-0.172698	-11.5706	0.799971	0.696913	-2.22272	-2.16822	1.27813	-3.47028	0.973129	10.0915	-0.635836	7.98132	0.279832	-7.43161	-2.81351	9.21774	-2.42453	1.68376	3.57196	-6.8296	0.714636	8.34381	0.205769	-0.542208	0.692046	2.98286	#VALUE!	2.09645	-7.7183	-4.81382	-6.42911	-5.52976
X-1	-3.14278	7.34278	-3.99741	3.92781	0.449267	-1.08726	-1.06757	-1.16681	-5.13868	0.161319	-3.2724	-0.185658	-5.93883	8.24981	0.0712719	-9.0303	0.300267	0.153331	-2.07117	-2.44412	1.25399	-3.60993	0.0946233	8.7958	-1.09306	6.83141	-0.535516	-7.50955	-1.41059	8.56806	-2.2527	1.33652	3.43079	-6.78612	0.734291	7.53774	0.51626	-1.25425	1.26272	1.97661	#VALUE!	7.89315	-10.4843	-1.36616	-7.86058	-5.94044
X-2	-3.36949	6.88231	-3.75821	3.10951	0.293189	-1.23398	-0.475948	-1.59514	-5.92526	0.0459264	-3.7915	0.769018	-6.19904	7.23162	-0.744662	-0.18606	0.212067	-0.386077	-2.14791	-2.38588	0.908575	-3.3206	0.184868	8.7407	-0.761118	6.43246	-0.769706	-5.23094	-1.13679	8.17705	-2.47159	0.944129	3.40461	-6.92106	-0.0840561	4.54311	-0.277014	-1.15282	0.132845	2.31286	#VALUE!	-6.53832	#VALUE!	-1.26477	-4.86046	-5.99257
X-3	-4.38561	7.85821	-3.84724	2.86144	-0.174275	-1.62261	-1.12376	-2.04303	-6.11179	-0.44739	-3.99156	0.755584	-6.24234	8.08676	-1.07035	0.19079	-0.271622	-0.525206	-2.65751	-2.86761	0.547881	-3.61231	0.724076	9.13955	0.0727873	7.40009	-1.1586	-5.8195	-1.76312	8.32591	-2.89329	1.23638	2.71093	-6.66268	0.513591	7.62013	-0.545105	-1.49951	0.113853	3.17805	#VALUE!	3.71272	#VALUE!	-1.08693	-5.74724	#VALUE!
X-4	-4.01222	7.77488	-3.98369	2.71268	-0.0223597	-1.30172	-1.18973	-1.25807	-5.67088	-0.0173281	-3.38309	1.32767	-5.45794	8.08809	-1.0405	-6.11505	-0.220732	-0.487349	-2.44325	-2.60792	0.88774	-3.69195	0.822384	9.02869	0.307978	7.3712	-1.04296	-6.11177	-2.08762	8.52701	-2.5872	1.35009	3.24087	-6.60996	0.759522	8.14999	-0.941586	-1.12077	-0.131593	3.18845	#VALUE!	0.565164	#VALUE!	-1.45	-8.40846	-7.39232
X-5	-3.77865	7.85869	-4.61545	3.27902	-0.0740367	-1.32951	-1.54453	-1.873	-7.31564	-0.740732	-3.69517	1.37924	-7.01833	2.71226	-0.784455	0.986576	-0.28138	-0.60096	-2.97952	-2.31386	0.539318	-4.0719	1.19098	9.58516	0.802328	7.95631	-1.38071	-5.51644	-2.14396	8.53229	-3.10935	1.81143	2.62251	-5.98777	1.01954	7.9872	0.00427832	-1.00327	0.198166	3.69335	#VALUE!	0.14683	-6.83917	-0.461942	#VALUE!	-4.95248
X-6	-3.66667	7.88211	-4.63322	3.08246	-0.142139	-1.73275	-1.74247	-1.92305	-5.44529	-0.677788	-3.35269	1.06601	-6.13235	9.08132	-0.967089	-0.286805	-0.439291	-0.821059	-2.69271	-2.82893	0.727226	-3.92948	0.66048	9.20385	-0.683415	7.78644	-1.04775	-7.71259	-3.3771	9.47148	-3.2325	1.23914	2.94979	-6.85688	1.11657	8.22987	-0.435853	-1.05094	0.429111	2.88494	#VALUE!	#VALUE!	#VALUE!	-1.05579	-7.04233	-7.0384
X-7	-3.18207	7.90186	-3.51345	3.23928	0.179534	-1.07752	-1.3016	-1.30116	-5.29447	0.110727	-3.08859	1.46711	-6.6626	8.50166	-0.511281	-10.2082	-0.00696074	-0.0763632	-2.27745	-2.17021	1.07826	-3.24186	0.509185	9.18744	-1.24935	7.54467	-0.643357	-7.52004	-2.05592	8.31732	-2.02819	1.18337	3.46477	-6.30891	0.615571	8.24086	-0.2022	-0.65756	0.54346	2.49427	-13.4158	#VALUE!	#VALUE!	-10.4886	-5.70911	-8.03612
X-8	-3.08184	-3.10626	-5.78261	2.72935	-0.268003	-1.90262	-1.57262	-2.50515	-5.46404	-1.27166	-3.9327	3.08567	-7.1206	9.00753	-0.963982	1.6612	-0.683011	-1.42713	-2.53727	-2.97579	0.537194	-4.52782	1.89553	9.72182	0.628965	8.91643	-1.49225	-4.61978	-2.43135	8.88274	-3.59676	3.31242	2.33291	-6.85768	1.66283	9.37016	-1.21414	-0.0721063	0.66449	4.99793	#VALUE!	-0.297383	#VALUE!	#VALUE!	-5.17252	-7.27165
X-9	-3.30758	8.22638	-5.45395	2.76134	-0.223151	-1.93485	-1.50542	-1.9421	-6.64921	-0.296556	-4.1291	1.42875	-8.82168	8.89774	-0.951959	1.69297	-0.44011	-0.797916	-2.60518	-3.00973	0.930362	-3.15455	1.44014	10.3141	0.402379	7.63626	-1.20559	-7.95544	-2.64901	9.40075	-2.89788	2.08743	3.32272	-6.33097	1.43803	6.58704	-0.699226	-2.38177	-0.440084	3.21666	#VALUE!	#VALUE!	#VALUE!	#VALUE!	-8.54805	#VALUE!

## Sheet: 2nd 48 miRs data
(-)∆Cq	Sample	hsa-miR-22-3p	hsa-miR-26a-5p	hsa-miR-27b-3p	hsa-miR-30a-5p	hsa-miR-103a-3p	hsa-miR-106b-5p	hsa-miR-132-3p	hsa-miR-139-5p	hsa-miR-181a-5p	hsa-miR-199a/b-3p	hsa-miR-206	hsa-miR-218-5p	hsa-miR-363-3p	hsa-miR-378a-3p	hsa-miR-483-5p	hsa-miR-659-3p	hsa-miR-122-5p	hsa-miR-147a	hsa-miR-335-5p	hsa-miR-379-5p	hsa-miR-10a-5p	hsa-miR-125a-5p	hsa-miR-127-3p	hsa-miR-143-3p	hsa-miR-124-3p	hsa-miR-133a-3p	hsa-miR-224-5p	hsa-miR-10b-5p	hsa-miR-99a-5p	hsa-miR-125b-5p	hsa-miR-141-3p	hsa-miR-579-3p	hsa-miR-1-3p	hsa-miR-107	hsa-miR-183-5p	hsa-miR-182-5p
	A-1	-0.373699	1.36584	-0.625917	1.80456	0.496358	-3.3252	-1.35711	-6.66794	-2.10972	1.74172	-5.0652	1.43349	1.72232	8.1201	4.82986	-1.292	-1.46221	0.865566	-0.409506	0.308699	-6.8174	-2.271	-0.476358	-4.55274	-5.9209	-6.79323	-5.28919	-7.14252	-4.84547	-7.17345	-0.0759507	-5.36611	-10.5785	-4.15521	-8.71367	#VALUE!
	A-2	-0.554454	1.09226	-2.15622	2.16568	-0.919178	-3.77817	-1.92797	-7.52184	-3.28308	1.05326	-4.19376	3.46471	3.33908	10.021	4.95875	-0.58623	-1.73913	-1.13472	-0.340595	2.04061	-4.27835	-4.45327	-0.468072	-3.99071	-3.24188	-6.30355	-6.82405	-4.79049	-6.12649	-3.73418	0.254828	-4.51921	#VALUE!	-4.38459	-8.63721	#VALUE!
	A-3	-0.248781	1.45082	-0.357109	2.44606	-0.610288	-3.2865	-0.762843	-6.72293	-2.24285	2.71643	-6.72211	1.23875	2.49271	7.73334	4.6054	-1.51202	-0.566261	0.531795	0.355895	-0.539509	-7.12637	-3.27367	-0.301823	-3.27198	-6.22217	-5.43626	-3.89072	-6.50813	-3.2133	-5.24026	-0.290675	#VALUE!	#VALUE!	-4.96561	-10.4622	#VALUE!
	A-4	-0.168293	2.03164	-0.939817	1.99623	0.192247	-3.23528	-1.21151	-6.31733	-2.32951	2.18745	-5.35181	1.16222	1.64321	7.80539	4.4052	-0.469614	-1.95715	0.187229	0.197802	0.171692	-4.19057	-4.29527	-0.0402977	-5.11579	-4.68028	-4.46266	-4.42951	-6.3441	-5.44993	-3.82803	-2.10059	-4.88585	-14.5426	-4.98863	#VALUE!	-19.9083
	A-5	-0.135653	1.75026	-0.985583	2.12514	-0.496536	-4.09196	-0.988325	-6.83256	-2.275	2.08821	-4.22203	1.2598	2.41986	8.42787	4.50148	-0.783713	-2.05023	0.0715881	0.372846	-0.155477	-4.97703	-2.59808	-0.168354	-3.38452	-4.61082	-5.66608	-5.00883	-5.43052	-4.73423	-5.00598	-0.777966	-4.34999	#VALUE!	-4.02036	#VALUE!	-17.8094
	A-6	-0.525623	1.75071	-2.20791	1.60651	-0.186111	-3.93565	-2.74848	-7.6063	-2.41083	1.88097	-2.82342	2.07096	3.15329	9.0353	4.44762	0.385624	-1.80513	-1.39173	-0.160819	1.471	-7.84618	-3.18096	-1.09206	-3.79144	-1.18486	-4.4511	-4.32067	-4.44999	-5.5215	-4.03912	6.03367	-4.78634	#VALUE!	#VALUE!	-7.30741	#VALUE!
	A-7	-0.65232	1.82031	-1.19728	1.54608	-0.765732	-3.77107	-1.31077	-7.83874	-3.03333	1.54526	-4.09408	2.03057	2.84299	9.73681	4.6885	-0.233402	-2.34823	-0.263975	0.395811	0.90261	-3.22192	-2.40477	-0.940724	-11.9454	-4.25157	-4.90607	-5.34292	-6.19121	-3.75159	-4.49629	-0.594782	-4.68706	#VALUE!	-6.59022	#VALUE!	#VALUE!
	A-8	-0.263361	2.0624	-0.903985	1.76884	-0.538007	-3.26004	-1.7238	-6.46404	-2.00283	1.65717	-4.89509	1.90685	1.31949	8.92154	4.56028	-0.595647	-3.00825	0.959257	0.157628	0.341595	-5.19172	-2.62489	-0.541035	-4.80204	-7.56961	-4.9122	-4.77547	-6.44945	-4.15811	-5.89516	#VALUE!	-8.33137	-6.39476	-3.95879	#VALUE!	-21.1216
	A-9	-0.603392	1.17342	-1.72048	2.42852	-1.82482	-3.23643	-1.40587	-8.06916	-2.77312	0.824464	-3.5708	2.15458	3.13652	9.56693	6.33917	0.22085	-2.97535	-0.313557	-0.247206	0.895714	-4.22533	-6.52934	-1.17614	-2.37631	-4.13869	-7.45421	-6.51255	-4.5671	-3.74208	-4.82926	#VALUE!	-6.65907	-9.26878	-5.6825	-7.90519	-17.0991
	B-1	-0.0626602	2.32547	-1.55828	1.84618	-1.01576	-3.73415	-1.14692	-6.76542	-2.16925	1.78716	-5.29312	1.50547	2.1274	8.67496	4.77508	0.13142	-1.70544	-0.119077	0.585035	-0.188068	-5.25159	-2.33221	-1.43805	-3.55971	-3.06293	-6.40116	-5.13689	-6.04974	-6.54245	-3.51453	-0.485924	-4.76659	-11.9823	#VALUE!	-12.0143	#VALUE!
	B-2	-0.062887	2.91438	-2.42661	1.69118	-0.627955	-3.97272	-1.40267	-5.95268	-1.88477	1.97047	-4.79548	2.14342	1.74041	9.09135	4.51075	0.0239594	-3.30042	-0.00747023	-0.0640397	0.411774	-4.79647	-2.25089	-1.65382	-4.08742	-3.96911	-8.13348	-4.62303	-5.64038	-6.54156	-4.77474	1.41219	-5.82192	-10.6739	-6.4086	#VALUE!	-19.4487
	B-3	-0.257367	2.6779	-1.95417	1.88061	-0.280978	-3.97341	-1.00919	-6.12287	-2.35018	1.81216	-5.38613	1.75504	1.78808	9.29229	4.52379	-0.196534	-1.34669	-0.866507	0.0429497	-0.0287952	-4.01206	-1.55813	-1.80349	-5.6945	-5.99589	-6.81836	-5.12529	-5.65949	-6.49975	-3.5212	2.0176	-5.47236	-11.0496	#VALUE!	#VALUE!	-18.1031
	B-4	-0.444533	3.0305	-1.11485	1.68574	0.160861	-3.48071	-0.796153	-4.41315	-1.04405	2.49563	-6.42993	1.41138	1.50809	7.57862	4.36761	-0.0394596	-2.07125	-1.42236	0.25266	-1.23466	-5.01954	-1.43264	-0.504459	-4.39581	#VALUE!	-5.19546	-3.31977	-6.4758	-4.69612	-6.17972	-0.513285	-5.43482	-7.72088	-4.04764	-14.5532	-17.7808
	B-5	0.274818	3.21363	-1.08925	1.89984	0.277582	-2.84533	-0.841252	-4.41417	-1.41969	2.57302	-7.92436	-0.346409	0.970649	7.36138	5.35536	0.188611	-2.07417	-0.337805	0.43545	-1.25789	-4.28531	-2.05975	-0.960273	-3.17779	#VALUE!	-5.57397	-4.32944	-6.06798	-3.94919	-2.93985	-1.49878	-6.98116	-10.0027	-4.10422	-11.7691	-16.5434
	B-6	-0.248448	2.66252	-1.87084	1.83558	-0.426578	-3.28164	-1.10623	-5.2675	-2.17034	1.71262	-5.65847	2.19275	2.18461	7.82681	4.70429	-0.064757	-3.96773	0.447823	-0.0458354	0.541352	-6.11537	-1.7987	-1.31368	-3.40536	-7.01429	-6.53703	-4.79442	-6.78804	-5.17012	-3.63021	-4.22317	-6.52009	-12.6702	-6.28427	-14.5732	#VALUE!
	B-7	-0.671423	2.74614	-1.97144	1.3147	-0.250189	-3.71485	-1.7831	-5.39059	-2.13663	1.13491	-4.12225	1.61674	1.59741	8.64388	4.76882	0.693171	-3.43276	0.350383	-0.576202	1.18328	-5.81418	-2.2918	-0.859652	-4.25729	-1.11141	-7.05985	-4.22199	-6.62021	-5.08563	-5.5014	2.93828	-4.78344	-9.15628	-7.44988	#VALUE!	#VALUE!
	B-8	-0.377917	2.92073	-1.25153	1.07549	-0.00647385	-2.98362	-1.11874	-5.15082	-0.946277	1.71514	-5.01127	1.66615	1.25348	8.28163	4.09936	0.401141	-4.09278	-0.0466939	0.153632	-0.580637	-4.2086	-1.88117	-1.07474	-3.42047	-7.92229	-5.4251	-4.65395	-5.73327	-5.99161	-4.26331	-4.05453	-6.48864	-10.5763	-5.11719	#VALUE!	-18.8988
	B-9	-0.188932	2.83207	-1.15771	2.47083	0.0411289	-2.67412	-0.680627	-4.88143	-2.36564	1.84356	-5.57935	0.426771	1.31343	7.75624	6.58393	-1.8411	-3.77587	0.306116	0.266834	-0.696125	-4.88313	-2.03503	-1.28497	-2.06255	-6.53908	-6.37654	-4.39679	-12.0766	-5.46788	-3.28364	-2.80815	-4.58876	-9.21487	-6.5651	-9.96549	-18.6749
	C-1	-0.24394	2.00692	-2.03556	1.54563	-1.05479	-3.92841	-1.61318	-7.33506	-2.47043	1.49749	-5.26225	2.34902	2.80337	7.97551	5.0272	0.959801	-1.07466	0.246152	-0.774608	1.38176	-4.74352	-2.72008	-1.5949	-4.47548	-0.77224	-5.21051	-5.28446	-6.17485	-5.07096	-4.89075	3.18978	-4.8174	-8.7966	-5.49956	-11.1276	-21.2453
	C-2	-0.54819	2.86351	-1.67111	1.39431	0.057075	-3.23327	-1.81326	-5.16294	-2.45574	1.97222	-5.51886	1.4356	1.20604	8.64694	4.39723	0.278878	-1.86251	0.0872087	-0.268012	0.194883	-4.63813	-2.26304	-1.29108	-3.25614	-1.55469	-5.30997	-4.94726	-5.22162	-4.82069	-3.71453	-0.186612	-5.31341	-8.61955	-5.19902	-9.30082	-19.4479
	C-3	-0.531081	2.30331	-2.05695	1.20086	-0.6581	-3.84979	-1.90358	-6.60348	-2.61106	1.53376	-4.62338	2.09689	2.0233	8.8071	4.30565	0.469801	-0.179449	0.0212242	-0.725297	0.980249	-4.61439	-2.99742	-1.65086	-4.90276	-4.22203	-4.96533	-4.66935	-5.96018	-5.04971	-5.07089	0.544718	-4.89523	#VALUE!	-5.06768	-11.846	-17.697
	C-4	-0.395928	2.62328	-1.32877	1.34564	-0.162543	-3.54545	-1.93218	-5.18274	-1.92168	1.82498	-5.15822	1.19067	0.868899	7.87896	4.21447	0.561902	-0.244784	0.0347619	-0.362869	-0.308397	-4.3128	-2.51309	-0.864555	-4.45811	-2.61301	-5.05374	-4.752	-5.86116	-4.4854	-3.78352	4.13444	-5.86006	-9.00991	-4.54646	-10.1456	-15.0639
	C-5	-0.327717	2.41612	-1.59127	1.28384	-0.201866	-4.02024	-1.94441	-5.30572	-2.68357	1.77787	-5.61814	2.32728	1.49128	8.26789	4.40756	0.294608	-0.148574	0.160836	-0.659536	0.0737713	-4.44338	-2.35277	-1.75687	-4.4785	-1.94582	-4.78581	-5.35699	-5.72934	-4.08669	-4.13845	#VALUE!	-5.34891	-8.27546	-4.85441	-16.14	-16.3055
	C-6	-0.21194	2.59164	-1.33078	1.46498	-0.0156412	-4.06312	-2.12386	-6.37343	-2.24009	1.70987	-2.96191	2.23837	1.57557	7.94227	4.67704	-0.202415	-1.65339	0.437646	-0.567417	-0.893392	-3.86286	-3.16053	-1.1735	-3.59726	-3.31886	-6.27134	-5.06456	-7.04664	-5.1895	-4.89106	-0.108204	-5.145	#VALUE!	-4.85022	-12.5803	-19.1752
	C-7	-0.279828	2.42239	-1.45761	1.39881	-0.572292	-3.82753	-1.71682	-6.49365	-2.43843	1.45359	-4.14831	2.53094	2.22041	9.82052	4.55112	-0.37068	-2.63167	0.176697	-0.960518	0.32286	-3.95162	-2.92893	-1.70432	-3.89769	-5.90474	-5.63913	-6.43536	-8.62194	-6.85942	-3.69046	0.259543	-5.56123	-9.12407	-7.27473	-10.4403	-18.1196
	C-8	-0.336315	2.47866	-1.0171	1.16497	-0.422251	-3.86124	-1.31036	-6.00596	-2.32512	1.52517	-4.69626	2.08511	1.2947	8.28393	4.32074	0.56279	-2.54491	1.04685	-0.640604	0.39719	-4.93502	-2.63387	-2.01302	-4.7909	-6.78651	-5.44176	-7.31036	-10.9841	-3.74722	-4.61612	3.21809	-4.80929	-9.40979	-6.52219	-11.3795	-16.7661
	C-9	0.192317	2.81394	-0.908425	1.74149	-0.453173	-3.20532	-1.35746	-6.04048	-2.16075	1.89982	-4.7944	1.4462	1.45986	7.5959	4.77311	0.53117	-3.36055	-0.0306268	0.0737072	-0.216317	-3.9325	-2.39254	-0.848115	-3.44075	-6.36286	-4.70825	-4.17345	-7.69203	-5.29185	-5.20971	-2.63397	-4.0021	-10.8913	-5.84119	#VALUE!	-21.0676
	D-1	-0.478798	2.10689	-1.7369	1.79663	-0.74257	-4.49782	-1.12413	-6.11055	-2.42344	1.23882	-4.28187	2.25041	2.66482	9.66785	4.82145	0.0809969	-3.41792	-0.384585	0.395979	0.174735	-5.03472	-3.2612	-0.362718	-4.65617	-3.62365	-5.95135	-4.55837	-3.82723	-5.10056	-5.12887	7.06398	-4.79855	-9.09683	-5.45117	-9.48851	-19.5836
	D-2	-0.45904	2.33351	-1.35382	1.79996	-1.57182	-4.36085	-1.32821	-6.70844	-2.28662	1.40241	-4.23513	2.63581	2.17418	9.45127	4.76066	0.604087	-3.5071	-0.146933	0.281752	0.514328	-5.31492	-4.07508	-1.35045	-2.59504	-1.795	-8.58954	-4.91578	-4.89095	-7.62643	-3.90855	4.67053	-9.51752	-12.0721	#VALUE!	#VALUE!	#VALUE!
	D-3	-0.417848	2.18768	-1.14726	1.70829	-1.67559	-4.04618	-1.22498	-6.29963	-3.64651	1.62812	-4.62769	3.6811	2.4098	10.4482	4.50409	0.166697	-4.75884	0.0539057	0.961408	0.0952154	-4.20106	-3.66217	-0.556868	-3.08412	-5.34034	-4.20114	-4.20938	-10.232	-5.8717	-4.61074	0.230562	-4.99132	-7.46914	-5.88464	-7.83246	-15.6474
	D-4	0.00364097	2.4296	-1.00391	1.59811	-0.880632	-3.55258	-1.38587	-5.07958	-2.85975	1.39326	-4.27678	2.00124	1.1888	9.69815	4.70097	0.525128	-4.72472	-0.323888	0.222518	0.32631	-3.46283	-4.991	-0.46927	-3.53522	-3.69712	-5.875	-3.83449	-11.6274	-3.59313	-3.94525	0.759958	-9.04953	-8.49906	-5.20051	-7.35582	-16.3509
	D-5	-0.229774	2.20899	-1.21995	1.78927	-0.488437	-3.69678	-1.53891	-6.214	-2.76689	1.13949	-4.27146	1.69604	1.30619	9.87477	4.38489	-0.0295876	-3.80533	0.961552	0.394042	0.505899	-4.39123	-3.5627	-1.0368	-4.80773	-2.61801	-5.02031	-3.51547	-9.30672	-6.01266	-5.03539	8.1816	-5.97485	-8.17582	-4.9874	-8.22198	-17.9818
	D-6	-0.180165	2.59412	-0.524334	1.79312	-0.517754	-3.25231	-0.961902	-5.21399	-2.79499	1.52147	-3.61846	1.62327	1.28316	9.58735	4.51014	-0.883053	-4.96477	0.058286	0.635049	-0.69423	-4.97745	-2.87232	-0.954032	-3.13871	-7.29832	-5.77023	-3.93455	-4.54313	-13.0198	-4.9978	0.0408156	-5.36839	#VALUE!	-4.34547	-10.9163	#VALUE!
	D-7	-0.153467	2.43397	-1.52625	1.60279	-0.671488	-4.14706	-1.53656	-6.70055	-3.4455	1.18138	-3.51277	2.16192	2.26755	9.33046	5.03593	0.384239	-5.49421	0.383646	0.0679084	2.33806	-4.55708	-4.241	-0.657207	-3.17147	-3.51745	-5.90526	-3.20988	-5.80653	-4.02309	-6.27252	4.26735	-5.61966	#VALUE!	-6.22564	-6.81757	-17.2195
	D-8	-0.239619	3.03506	-0.357928	1.85827	0.867827	-4.17057	-1.51628	-5.47883	-2.37898	1.39857	-4.31741	-3.93116	1.43978	9.14252	4.84671	1.70071	-3.73643	0.346334	0.727334	0.764091	-5.15625	-2.36863	-0.542609	-4.09606	-6.28442	-5.11863	-3.36057	-5.59241	-4.61582	-5.53284	0.0610726	-4.7543	-8.57244	-5.26198	-8.48413	-19.7397
	D-9	-0.101523	2.56162	-0.907097	1.29287	-0.393488	-3.84164	-1.25874	-5.12021	-3.29969	1.57969	-5.08049	1.95186	1.26196	8.52716	4.68515	0.531131	-3.85328	0.746315	0.853972	-0.135558	-7.63156	-4.28426	-0.614323	-4.0106	-11.2346	-5.05294	-3.97927	-6.70188	-5.11125	-4.94186	#VALUE!	-4.6003	-8.03236	-4.74392	-9.11627	-16.3616
	E-1	-0.971571	2.25753	-1.8262	1.11205	-0.0958488	-4.34575	-2.06647	-7.00399	-1.24126	1.48396	-5.06684	2.43034	1.68576	8.8184	4.07856	0.391797	0.206875	-1.03223	-0.119452	1.30433	-4.01445	-1.95935	-0.740211	-4.37161	-3.84912	-5.48178	-4.96466	-5.34857	-3.33541	-3.79907	-2.70357	-8.19785	-13.3072	-4.54164	-10.7508	-19.168
	E-2	-1.24268	2.74319	-1.66311	1.66618	-0.449409	-3.74846	-2.80402	-7.9731	-2.27293	1.69832	-4.30289	1.86952	1.93412	9.57328	4.30729	2.44428	-1.93081	-0.486406	-0.0620883	0.699723	-3.57165	-2.74011	-1.23267	-2.00178	-3.48298	-5.15756	-6.08328	-5.0805	-3.42935	-5.98721	1.7141	-4.44424	-8.06593	-6.08045	-10.4863	-18.7514
	E-3	-0.193371	2.86217	-1.73341	1.72798	-0.531905	-4.29902	-1.28305	-7.49898	-2.10756	1.87906	-5.35068	2.29526	1.30238	8.21172	4.573	-0.131812	0.136121	-0.433344	0.349009	0.226442	-3.74661	-3.09456	-0.934811	-2.97194	-5.09619	-4.09133	-4.74793	-12.4047	-4.03217	-4.21044	1.28423	-4.93382	-8.98466	-6.37311	-9.8898	-21.1313
	E-4	-0.945928	2.96987	-1.88126	1.36404	-0.483421	-3.60185	-2.60284	-7.99295	-1.05734	1.46979	-3.9628	1.7689	2.45502	9.10692	3.89187	-0.431825	-1.24555	0.723366	-0.2569	0.712906	-5.27793	-2.70969	-1.31814	-3.04715	-6.36154	-2.87886	-5.77101	-6.59253	-3.37285	-3.32694	6.0912	-5.94661	-5.86162	-4.44124	-12.8795	#VALUE!
	E-5	-0.602305	2.31162	-2.13382	1.36106	-0.148241	-4.22773	-1.41453	-8.68377	-2.61685	1.30762	-3.84285	2.41745	2.13142	10.1103	4.39175	-1.09407	0.507888	-0.72353	0.0283888	0.920162	-3.96918	-2.93453	-0.360878	-2.91072	#VALUE!	-5.68237	-7.80087	-7.8584	-3.55431	-3.84163	#VALUE!	#VALUE!	-8.02891	-5.59915	#VALUE!	-20.9605
	E-6	-0.630683	2.60469	-1.18248	1.38764	-0.733583	-3.79082	-2.31964	-8.57455	-1.88248	1.75723	-3.87778	2.4489	1.58695	9.51598	3.90424	-0.211642	-0.297275	-0.47871	0.066493	0.707528	-5.97357	-3.27768	-0.958988	-3.3101	#VALUE!	-3.61579	-6.67857	-7.37429	-6.8165	-4.38022	#VALUE!	-4.68474	-8.2567	#VALUE!	-9.14443	#VALUE!
	E-7	-0.569783	2.1726	-1.88457	1.74843	-0.766593	-5.00917	-2.19919	-8.68367	-2.54896	1.54751	-3.21977	2.53697	2.67533	10.9144	4.57891	1.37991	-0.521556	-2.06423	0.0286971	-0.115212	-6.02169	-2.76789	-1.29863	-5.47696	-2.52333	-6.08078	-10.2372	#VALUE!	-6.76763	-4.1586	#VALUE!	-8.23037	#VALUE!	-4.22962	-10.4978	#VALUE!
	E-8	-1.08077	2.32822	-1.4418	1.37878	-1.27859	-4.37782	-1.92694	-7.15246	-1.90278	1.56439	-4.11856	2.43172	3.54196	9.3606	4.27135	-1.10734	-0.197679	-1.14095	-0.0651303	0.913813	-4.67799	-2.68746	-0.531068	-3.4668	-3.44063	-5.9498	-6.42399	-5.06057	#VALUE!	-3.91063	10.3642	-5.54083	-9.81461	-5.37513	-9.95764	#VALUE!
	E-9	-0.566719	2.23481	-1.34848	1.47375	-1.06708	-4.00141	-3.425	-8.17624	-2.16718	1.83431	-3.78102	2.51534	2.18326	10.1796	4.19467	-0.392189	0.267626	-0.687092	0.492819	0.236248	-5.06978	-4.45902	0.0597193	-4.06584	-6.05903	-7.32644	-8.87933	-5.60666	-6.4231	-2.76713	-1.23448	-6.52082	-6.93968	-7.22104	#VALUE!	#VALUE!
	F-1	-1.32732	1.92484	-1.8445	1.31757	-0.115015	-4.43442	-2.15034	-5.62346	-2.80035	1.54717	-4.1627	3.14108	2.15385	9.23846	4.14656	0.363453	-2.63625	0.0884589	0.10702	1.0659	-3.80594	-3.40823	-1.7292	-4.81516	-1.90703	-4.63756	-3.62189	-5.62409	-3.70451	-3.69523	0.39634	-4.55449	-9.04302	-4.83734	-7.72225	-13.841
	F-2	-0.71891	2.67681	-2.23565	0.948265	-0.408422	-3.95147	-1.91429	-5.05654	-1.65625	1.67469	-4.05168	2.49564	1.95568	9.30403	3.82608	1.3489	-2.22139	-1.41452	-0.642191	0.0412159	-3.35568	-2.80529	-1.63457	-6.23365	-5.07763	-4.20554	-4.91999	-4.50846	-4.39534	-5.42785	2.83694	-6.2619	-8.05871	-7.15566	-7.2855	-17.2891
	F-3	-0.533148	2.24405	-2.04031	1.38053	-0.236053	-3.67392	-1.52081	-5.23365	-3.0073	1.58488	-3.86427	1.91317	1.50804	9.67726	4.09409	0.275576	-1.41384	-0.778629	-0.408568	0.0329178	-3.23644	-3.19148	-1.25714	-5.27839	-0.684677	-6.88772	-5.18527	-4.27801	-4.93586	-6.17861	6.84668	-5.49295	-11.7204	#VALUE!	-6.52437	-17.2261
	F-4	-0.286679	2.53042	-2.04426	1.00467	0.279752	-4.15882	-2.30656	-4.06653	-2.12638	1.82584	-4.05444	1.73585	1.44411	8.18321	4.32402	0.554022	-2.47347	-0.4759	-0.420614	0.531767	-4.23752	-2.78364	-2.00288	-5.3583	-6.05085	-4.19112	-4.79542	-9.65751	-7.23852	-5.91449	3.33007	#VALUE!	-7.48642	-6.30673	-10.2326	-15.4405
	F-5	-0.581711	2.73381	-1.89195	0.934098	0.373622	-3.0949	-2.34276	-3.91296	-2.09122	1.4152	-3.47996	0.715094	2.4205	8.62085	4.20608	-0.327675	-2.21452	-0.655222	-0.419571	-0.406805	-4.38149	-3.31261	-1.73478	-4.61577	-4.41318	-5.77127	-3.90817	-9.22472	-4.14927	-4.93717	2.24425	-5.11841	-7.0356	-4.98941	-10.5717	-22.4172
	F-6	-0.329564	2.52649	-1.2398	1.25812	-0.404723	-3.13615	-1.93157	-4.51871	-2.09561	1.57096	-5.27618	1.22361	1.52315	8.21713	3.99341	1.50479	-3.08994	0.553333	-0.333488	-0.0152537	-4.73522	-2.70466	-1.26458	-4.07727	-8.86571	-3.58914	-3.46389	-6.78217	-8.63997	-5.29555	3.72069	-5.23585	-7.83757	-6.56315	-6.90578	-15.9602
	F-7	-0.120051	2.66552	-1.50189	1.66893	-1.06	-3.7328	-1.51027	-5.1165	-3.13508	1.26048	-4.40318	2.80081	2.25806	8.65269	4.76914	0.672322	-3.07253	-0.623032	-0.470095	-0.00254553	-3.36274	-2.99184	-2.32269	-3.23087	-6.22334	-4.24386	-4.44985	-5.49672	-3.78471	-4.41105	-2.75021	-4.51925	-10.6057	-5.84939	-8.00284	-20.9565
	F-8	-0.228212	2.36523	-1.45093	1.54587	-0.281251	-3.90148	-1.59956	-4.58927	-1.60447	1.09473	-4.10013	1.74979	1.37067	9.07896	4.11708	-0.293394	-2.80013	-0.36789	-0.118766	0.0131588	-3.92356	-2.74431	-1.81092	-7.76209	-12.5579	-4.27888	-4.44864	-5.04505	-14.8684	-4.27211	-0.675131	-6.07033	-8.43821	-4.84211	-6.9809	-19.1541
	F-9	-0.26238	2.62931	-1.44736	1.34557	-0.188583	-3.62666	-2.07253	-4.36393	-2.31574	1.52021	-4.20278	1.58517	1.57406	8.16653	4.52472	0.940703	-2.20323	-0.888716	-0.296304	-0.418065	-5.50366	-3.42893	-2.08122	-5.16086	#VALUE!	-4.43041	-3.8131	-5.41197	-8.02449	-4.25543	7.30082	-7.11643	-6.99313	-6.22883	#VALUE!	-20.1403
	G-1	-0.497557	2.24858	-1.16495	1.54603	-0.756838	-3.05404	-1.20918	-6.06002	-2.517	1.8405	-4.55511	1.48798	1.66755	7.85656	4.70282	0.633934	-2.41754	0.574791	-0.377326	0.0508334	-4.48167	-3.32477	-1.13693	-5.80671	-3.14763	-3.21428	-6.6437	-5.05867	-4.92335	-5.65988	-0.82894	-4.65787	-10.2278	-4.98887	#VALUE!	-19.2801
	G-2	-0.22743	2.77046	-1.75899	1.99572	-0.936638	-3.45565	-1.22329	-6.28376	-2.39565	1.46938	-4.3998	1.80605	1.40352	9.02014	4.6333	0.0430078	-0.870943	-0.831083	-0.966656	0.208294	-4.45475	-2.92008	-0.858168	-7.21027	-3.04847	-4.59169	-5.9907	-4.95049	-7.65305	-3.25182	-0.0211571	-5.509	-8.53463	-4.54335	-8.01466	-15.8496
	G-3	-0.280019	2.57014	-1.57639	1.78887	-1.23608	-3.60929	-1.78858	-6.02763	-3.67829	1.78668	-4.91918	1.74666	1.40939	8.59213	4.79376	0.321052	0.486778	0.113829	-0.480597	-0.0132244	-3.57186	-3.18854	-0.989475	-4.62791	-2.45059	-4.01059	-5.47912	-5.92648	-3.88918	-4.43948	1.3058	-4.95353	-14.9279	-8.14451	-8.15607	-16.5633
	G-4	-0.143968	2.76844	-1.09588	1.7686	-0.179224	-3.20251	-1.57531	-5.93419	-2.44452	1.6029	-4.69199	1.73418	1.9881	8.43456	4.09636	-0.796545	-0.672209	-0.00817679	-0.963775	-0.684835	-5.18124	-3.66902	-1.07887	-4.7832	#VALUE!	-3.94904	-7.18956	-4.89095	-6.3206	-4.88585	#VALUE!	-4.16167	-8.87569	-5.21461	-7.30195	-20.4234
	G-5	-0.347917	2.16328	-1.38923	1.10261	-0.133978	-3.13367	-2.00265	-5.33183	-3.65387	1.485	-3.93662	2.08998	1.7065	8.95635	4.57291	0.248868	-1.69593	-0.663589	-0.999869	0.963642	-4.33282	-3.37887	-1.00267	-3.97778	-2.01518	-3.97884	-7.00841	-5.93574	-4.55285	-4.32072	0.567409	-4.74683	-6.6828	-5.16107	#VALUE!	-18.2502
	G-6	0.196857	2.72956	-1.16356	1.42508	-0.552613	-3.1072	-1.11999	-6.28088	-2.34074	1.63174	-5.02051	1.89863	1.86334	7.92688	4.54852	0.517777	-2.46302	0.139711	-0.720395	-0.109191	-4.68893	-2.80826	-0.748743	-4.31746	-2.71828	-3.72505	-6.08902	-5.75481	-5.52538	-4.67935	0.0751048	-6.26862	-7.91817	-6.64231	-8.72874	-17.4522
	G-7	-0.152128	2.21793	-1.92886	1.78582	-1.41222	-4.1621	-1.8363	-7.27248	-2.55259	0.757127	-4.18086	2.69809	2.29512	9.55362	5.14213	-0.167234	-1.44112	0.661453	-0.834571	0.829186	-4.45828	-4.14871	-1.48638	-6.15917	-3.53672	-4.40175	-8.8458	-4.9951	-5.99417	-5.00608	-4.34416	-4.48444	-8.27287	#VALUE!	#VALUE!	-15.5065
	G-8	-0.0225393	2.54041	-1.57872	1.73578	-0.133632	-3.6902	-1.10788	-6.42792	-2.63414	1.33972	-4.38409	2.11598	2.49826	9.01606	4.8591	-0.888483	-1.44889	-0.776675	-0.844179	-0.167983	-7.71841	-3.55739	-1.78479	-4.79456	-6.72594	-3.32634	-7.69386	-4.73257	-5.52159	-3.53186	#VALUE!	-4.74527	-6.40577	-3.64758	-11.1142	-14.0634
	G-9	-0.0761878	2.66381	-1.1533	1.85692	-0.540972	-3.38267	-1.35119	-5.66594	-3.81786	1.59664	-4.25946	1.07571	1.91172	9.08998	4.7239	0.219265	-1.28888	-1.10986	-0.127765	-0.363851	-5.63736	-3.68504	-1.24978	-5.49097	-3.93699	-3.82415	-8.35454	-4.34534	-6.16022	-7.99397	-0.550843	-4.25399	-8.99425	-7.86018	-11.1346	-15.8894
	H-1	-0.349843	1.89568	-1.38309	1.45338	0.117811	-3.64157	-1.45862	-6.25022	-2.63334	1.44699	-5.05438	1.49705	1.83664	8.51396	4.62717	-0.0283322	-0.54433	0.0126149	-0.619352	0.561774	-4.54018	-1.89142	-1.93758	-3.90256	-4.02934	-3.59401	-4.57875	-4.31746	-2.73467	-5.31469	#VALUE!	-3.79833	-7.47058	-4.95568	#VALUE!	#VALUE!
	H-2	-0.445191	2.74532	-1.42803	1.26256	0.383151	-3.2323	-1.2445	-5.51669	-2.76866	2.07934	-5.77918	1.84129	1.23303	8.11459	4.08798	-0.0605735	-1.44281	0.643347	-0.216019	-0.256663	-5.33491	-1.32293	-1.14074	-2.63468	-3.12387	-2.94547	-3.18498	-4.57764	-5.47708	-4.26004	#VALUE!	-4.85577	-6.72571	-5.35886	-13.2624	-20.9072
	H-3	-0.358057	2.60103	-1.49805	1.37872	0.0933185	-3.09871	-1.6388	-5.96306	-2.26504	1.48564	-4.93842	1.36678	2.31974	8.27484	3.81309	-0.509141	-0.101647	-0.246616	-0.582965	-0.132652	-4.88686	-1.80519	-1.29828	-3.3227	-3.73249	-2.57555	-3.60522	-5.8983	-3.83462	-3.64786	-0.584119	-5.41089	-8.85591	-6.23822	-6.9664	-15.7381
	H-4	-0.870376	2.73728	-1.76968	1.49504	-0.220563	-3.39896	-1.45841	-6.80578	-2.46667	1.741	-4.04525	2.17329	1.56347	8.40984	3.98352	-0.133592	-0.18413	-0.447629	-0.134931	-0.167482	-4.64608	-1.7384	-1.84177	-3.89609	-4.92794	-2.58127	-3.41024	-7.52277	-4.60822	-3.77852	7.07865	-7.46543	-5.821	-3.69314	#VALUE!	-17.4934
	H-5	-0.294636	2.66956	-1.14832	1.53244	0.198102	-2.64082	-1.63474	-5.90991	-2.34488	1.62964	-4.22165	1.26843	1.2635	7.79833	4.19729	0.0884929	-1.23363	-0.456925	-0.27125	-0.489011	-4.17708	-1.30759	-1.94667	-2.9131	-1.94309	-2.74582	-4.55757	-6.31761	-3.01385	-3.1378	-0.840142	-6.22196	-8.63674	-4.89064	-8.92227	-15.5102
	H-6	-0.429727	2.46267	-1.55101	1.27766	-0.283705	-3.62989	-1.41217	-6.48287	-2.17884	1.00632	-4.61916	1.50671	2.60716	8.48675	4.19206	-0.148313	-0.769972	0.469935	-0.73881	0.235202	-3.4149	-1.98019	-1.97382	-3.03701	-5.94521	-3.10745	-4.42877	-7.23964	-3.30028	-4.90772	-0.177911	-7.44504	-8.37471	-4.24568	-7.01976	-20.0398
	H-7	-0.438065	2.82646	-1.84699	1.84883	-0.363013	-3.6249	-0.72292	-6.76542	-2.80835	1.12838	-4.50225	1.99254	1.69745	9.98574	4.82973	0.762484	-2.1193	-1.87496	-0.703975	0.69853	-3.68944	-2.45112	-2.27411	-3.60593	-6.44626	-4.1644	-4.48791	-5.33243	-4.04592	-5.47104	-2.54293	-4.93647	-8.98241	-7.24505	-5.08682	#VALUE!
	H-8	-0.191729	2.39944	-1.45982	1.71925	0.234405	-3.88686	-1.88076	-6.91781	-2.05573	1.30786	-5.04385	2.38769	2.18216	9.14081	4.40914	0.212519	-2.53591	0.163991	-0.67033	0.485508	-6.90751	-2.21479	-1.35495	-4.00052	-6.20967	-3.49076	-5.86156	-7.24024	-4.46273	-3.7161	7.54863	#VALUE!	-7.50161	#VALUE!	-10.1411	#VALUE!
	H-9	-0.314155	2.6357	-1.3143	1.72403	-1.13473	-3.318	-2.66754	-6.37086	-3.00555	1.57959	-3.90424	0.928545	3.01111	8.85294	4.78372	0.0472474	-0.766347	-1.16394	-0.0330008	0.429775	-3.31003	-2.48048	-1.93172	-4.14267	-6.12334	-3.75246	-5.72837	-5.76605	-6.60544	-4.09083	-5.07548	-8.95815	-5.56645	-5.43757	-7.60906	-18.4852
	I-1	-1.73564	-0.0645267	0.278059	1.46836	1.00241	-5.16554	-4.03767	-8.14755	-2.41909	-0.0163842	-3.525	3.94437	4.87378	8.68745	5.88544	0.0694272	-0.59864	0.76191	-2.6912	1.43003	-4.63918	-3.30339	-2.0608	-4.59359	-5.33707	#VALUE!	#VALUE!	-18.6607	#VALUE!	#VALUE!	0.148721	-3.12516	#VALUE!	#VALUE!	#VALUE!	#VALUE!
	I-2	-1.17148	1.15468	-1.74041	0.661185	-0.501317	-4.96264	-2.00623	-7.08398	-2.39357	0.582211	-4.70167	3.12166	4.33358	8.60368	4.60293	1.78606	-1.66031	-0.306995	-1.27333	2.95595	-6.1582	-3.45619	-2.46385	-4.47337	3.59715	-3.64658	-3.67375	-7.80224	-7.18762	-5.95594	7.35621	-7.49815	-9.26842	-6.60697	-9.32797	-18.6047
	I-3	-0.509577	0.979401	-1.11517	1.59874	-0.471437	-4.50473	-2.0932	-5.98687	-2.17597	1.07488	-3.84135	2.58534	4.33689	9.17894	4.54543	-1.85456	-1.55537	-1.43789	-0.732387	1.97888	-5.64526	-2.76186	-1.53074	-4.4774	-2.65589	-3.17687	-5.51153	-5.12945	-6.59232	-4.46717	-2.12156	-4.79728	-9.76089	#VALUE!	#VALUE!	#VALUE!
	I-4	-1.09744	1.08366	-1.68493	1.38892	-0.593312	-5.32879	-1.32639	-6.84507	-2.91088	0.96897	-3.31393	3.64127	3.52546	9.99965	4.84583	-0.961178	-1.85165	-1.59168	-0.624344	2.67584	-5.85295	-2.87718	-3.10527	-4.90597	-3.19118	-5.65319	-8.95594	-6.59985	-6.89229	-5.74815	4.38986	-8.20565	#VALUE!	-6.83983	-9.58683	#VALUE!
	I-5	-0.35795	1.91806	-0.433311	1.4142	0.600912	-4.3568	-1.02596	-4.05149	-1.84401	1.63963	-5.90182	2.19782	1.53474	8.85095	4.55747	-1.5905	-1.96094	-1.18984	-0.249533	0.248404	-5.41622	-1.95583	-1.22798	-3.3297	-8.73637	-3.94198	-4.3264	-6.53826	-3.94865	-5.86106	-2.74654	-3.95167	-7.23662	-2.985	#VALUE!	-18.8989
	I-6	-1.1038	1.68763	-0.654066	1.86989	-0.421909	-3.81803	-0.944345	-4.8981	-1.59553	1.01781	-3.85652	-4.34281	3.32828	11.1951	5.06077	-1.90033	-2.22088	-1.27467	-0.433436	3.30492	-4.00435	-2.40042	-1.02813	-6.12923	-3.74499	-8.67659	-7.99565	-2.90702	-4.27951	-3.75527	-2.30795	-8.3333	-9.03884	-3.20479	-9.61419	#VALUE!
	I-7	-1.10741	0.968682	-1.98583	1.50186	-0.981136	-5.21967	-1.99969	-6.54319	-2.58376	0.532245	-4.26974	4.11286	4.1979	9.78613	5.26395	0.0494505	-2.2262	-1.45646	-0.960636	2.92065	-3.40022	-3.30961	-4.74742	-4.73789	-0.824265	-4.8317	-6.12154	#VALUE!	-8.29015	#VALUE!	-1.07045	-6.02251	#VALUE!	-4.29314	-8.82646	#VALUE!
	I-8	-0.527993	1.17602	-2.1621	1.60412	-0.969027	-5.10735	-1.60075	-7.15518	-6.02468	0.305338	-3.07474	4.52453	4.65794	10.2976	5.05767	-0.501333	-0.952376	-1.20741	-1.22115	2.88083	-4.06969	-4.53987	-2.07768	-6.96269	-2.49676	-5.83318	-6.82563	-11.5227	-5.31434	-4.76418	-0.640591	-8.7549	#VALUE!	-3.89755	-6.87534	#VALUE!
	I-9	-0.648412	1.73148	-0.824172	1.90202	0.226052	-4.26593	-0.996537	-5.08281	-4.11551	1.28877	-3.22494	-3.45943	4.28106	9.75667	5.17656	-1.00368	-1.70513	-0.79469	-0.256956	2.01559	-4.79998	-1.19641	-2.24907	-4.69802	-3.78203	-3.5047	-5.99409	-6.72136	#VALUE!	-5.48636	-1.30068	-3.76887	#VALUE!	-4.10275	#VALUE!	#VALUE!
	J-1	-0.634226	1.6152	-1.61621	2.00426	-0.440152	-5.03549	-1.97719	-6.31811	-2.11262	0.725111	-4.68957	2.67121	3.12217	9.28287	5.20077	-1.77492	0.316729	-1.47304	-0.766027	1.89923	-5.24199	-2.49512	-1.87368	-11.3177	-3.13234	-3.81476	-2.86353	-4.50058	-4.70122	-3.2073	-8.7324	#VALUE!	#VALUE!	-3.14712	#VALUE!	-16.6892
	J-2	-0.424721	2.06354	-1.60871	1.63008	-1.05406	-4.37006	-1.41181	-5.90058	-2.01432	0.863877	-4.34795	2.7395	2.74418	9.18586	4.68239	-0.494894	-0.60151	-1.7374	-0.28927	0.345856	-6.88715	-2.48192	-2.37676	-3.79603	0.319443	-3.44434	-2.59703	-6.85341	-6.88896	-4.40133	-0.006771	-8.14805	-7.52411	-4.79014	-9.56999	-16.6595
	J-3	-0.54821	2.55311	-1.70329	1.60393	-0.12404	-3.79232	-1.92854	-4.83238	-1.89537	1.08538	-4.38292	2.49263	2.13985	8.7679	5.29154	-1.89985	-0.669407	-1.52038	-0.365502	-0.272126	-4.19641	-2.1589	-1.59347	-4.56263	-7.62359	-5.32264	-3.32554	-5.04851	-3.99671	-3.97616	-1.28701	-9.41226	-7.61409	#VALUE!	-10.2601	-19.5567
	J-4	-0.919431	2.03428	-2.21032	1.6001	-1.33428	-4.57797	-1.7928	-7.29386	-2.52689	0.862343	-3.99026	2.95861	3.89063	9.6114	5.31438	-1.3483	-0.202541	-1.62949	-0.255141	1.80955	-3.30435	-2.38772	-2.23387	-4.35539	-2.10184	-4.44267	-3.09251	-5.75127	-3.86678	-5.89619	-5.22151	-4.47077	-11.5876	#VALUE!	-7.76219	-16.5803
	J-5	-0.250071	1.94927	-2.13112	1.8207	-1.22659	-4.11762	-1.76514	-6.25557	-2.97902	1.22391	-4.21978	3.18374	3.08709	9.34331	5.44889	-2.22311	0.710868	-2.06805	-0.270501	0.738799	-4.42507	-2.37142	-2.21355	-17.7802	-4.53547	-4.04597	-2.4992	-4.32385	-6.4964	-5.89853	#VALUE!	-7.74013	#VALUE!	-9.39366	-11.6777	#VALUE!
	J-6	-1.8762	1.8429	-2.60995	1.50695	-1.62226	-5.18163	-1.93207	-7.34284	-3.06848	0.773356	-3.73085	3.92993	4.30421	9.7851	5.27335	0.367498	0.354946	-1.62898	-0.903334	1.75836	-3.32223	-3.41626	-2.89571	-8.13227	-0.497099	-4.7634	-4.65097	-4.13348	-3.73104	-3.99076	0.353339	-7.19685	-9.2409	#VALUE!	-7.64497	#VALUE!
	J-7	-0.451471	2.12796	-1.33526	1.73559	-0.921453	-4.71123	-2.15864	-6.29247	-2.31329	1.09394	-4.38384	2.54541	2.58598	9.23497	4.95621	-1.06553	-0.830027	-1.26727	-0.225953	1.67637	-4.83062	-1.9817	-2.00451	-6.62212	-1.6514	-3.63372	-3.06823	-3.9042	-4.23019	-3.8525	0.749723	#VALUE!	-15.5257	#VALUE!	#VALUE!	-19.2642
	J-8	-0.496127	1.84062	-2.00233	1.75973	-1.79235	-5.10026	-1.74656	-7.80956	-2.64724	0.596747	-3.64328	3.95992	2.78828	9.87502	5.0134	-0.958689	1.53903	-1.21321	-0.749621	0.786472	-4.96534	-2.45511	-2.89976	-6.26082	-0.526571	-4.08832	-2.9464	-4.46568	-5.36697	-3.07909	-0.0467398	-5.49581	#VALUE!	-4.71664	-8.9747	-16.3592
	J-9	-0.742306	1.69338	-1.38969	1.64197	-1.48251	-5.00861	-1.92004	-7.46279	-1.54159	0.82719	-3.54187	3.9399	3.05189	9.33309	5.11198	-1.47967	0.169867	-1.34905	-0.318179	0.467042	-6.02017	-2.37974	-1.58723	-7.80093	-2.10409	-4.50698	-3.91509	-4.31947	-4.81398	-3.8105	-1.72875	-7.04047	-10.9026	#VALUE!	-12.037	#VALUE!
	K-1	-0.690636	0.747629	-1.87722	0.987345	-0.0576691	-5.8197	-2.41064	-7.87006	-2.30082	0.0720956	-4.56207	3.73142	3.50443	8.86557	4.96041	0.514146	-0.492724	0.876401	-1.10511	2.92723	-6.89875	-3.53676	-2.74455	-11.4965	-0.0789463	-4.74813	-1.25483	-4.69357	-5.86406	-3.50954	1.36473	-6.5481	#VALUE!	-4.22559	#VALUE!	-18.4868
	K-2	-0.577628	2.17199	-2.00444	1.93724	-0.923353	-4.7257	-1.66853	-5.70484	-2.21075	1.13723	-3.5076	3.43	3.5515	9.60645	4.66542	-1.41908	-2.28153	-1.67839	-0.631239	0.833255	-5.15105	-2.9146	-3.03896	-4.98416	-4.92162	-2.57621	-4.59416	-14.2256	-6.45991	-5.38902	-0.169203	#VALUE!	-7.26586	-4.96003	#VALUE!	#VALUE!
	K-3	-0.432942	2.20539	-1.9085	1.21837	-0.577899	-4.7232	-1.91472	-5.89651	-2.37866	1.33474	-4.40684	3.43111	3.52854	9.42611	4.60916	-0.420339	-2.79156	-1.81691	-0.453486	1.96816	-4.20178	-2.30049	-4.31301	-3.35247	-2.77125	-2.9238	-5.00448	-4.98015	-7.50961	-6.70579	-0.849897	-4.83098	-7.01685	-5.83024	-10.4124	#VALUE!
	K-4	-0.305362	2.20732	-1.8911	1.44494	-1.32152	-4.27565	-2.8627	-7.36845	-2.92338	1.30793	-3.24119	3.73082	3.35613	10.263	5.16556	-0.209982	-2.35936	-1.44163	-0.84842	1.57305	-3.81157	-2.5556	-2.62072	-4.25213	-1.28493	-3.87267	-3.49593	-6.16573	-3.66876	-4.60157	1.44715	-4.77014	-10.028	#VALUE!	-6.11912	#VALUE!
	K-5	-0.577611	1.95582	-1.75348	1.63018	-0.951123	-4.82764	-1.03729	-6.76891	-3.16834	1.28778	-3.10468	3.30733	3.50125	9.59563	4.89138	-1.14496	-2.30855	-1.09081	-0.220957	0.784989	-3.49167	-2.23609	-4.33564	-3.66483	-1.82435	-5.04813	-4.57205	-4.80647	-4.82491	-3.52158	-0.367722	-6.17197	#VALUE!	#VALUE!	#VALUE!	#VALUE!
	K-6	-0.472881	1.60392	-3.56836	2.23114	-2.49098	-4.77585	-3.16393	-7.11986	-4.4793	-0.0120559	-2.17911	5.99433	4.72951	11.4545	5.80735	0.988108	-2.23841	-4.10728	-0.586863	2.38601	-2.73587	-7.08184	-5.27645	-7.5521	-0.585697	-6.32492	-7.951	-2.74721	-6.64191	-5.60305	1.84441	#VALUE!	#VALUE!	-4.76247	#VALUE!	#VALUE!
	K-7	-0.175498	2.10767	-2.49654	1.65558	-0.764481	-4.47489	-1.3553	-6.16261	-2.06921	0.793239	-4.10229	3.88656	2.96103	9.32521	4.73717	-0.447702	-2.5346	-2.1045	-0.87128	2.09243	-5.03819	-2.50543	-4.32253	-4.30641	-12.0098	-3.71142	-6.66657	-5.96808	-6.54662	-4.92521	0.514941	-6.11577	-10.9261	-11.5731	-13.0329	-19.2977
	K-8	-0.711087	2.12441	-2.54214	1.47683	-0.528188	-4.85308	-2.37155	-7.41922	-2.60329	1.04447	-3.5659	4.69125	3.46559	9.87812	5.25747	-0.252612	-2.78669	-1.85398	-0.813691	2.36329	-4.87852	-2.74653	-2.28599	-4.98208	-1.69527	-3.06505	-3.75574	-5.04132	-5.44355	-5.73685	0.0928367	-4.6724	-9.03193	-6.41476	-8.22943	-19.3107
	K-9	-0.405324	1.93003	-1.04426	1.41662	-1.90345	-4.03598	-1.37576	-5.76031	-2.50266	1.6554	-3.34905	3.21919	2.98297	9.1286	4.81037	-1.24031	-2.00664	-1.17594	-0.299862	-0.0436206	-4.54699	-2.63285	-2.62599	-2.88724	-5.18907	-3.02437	-6.68688	-6.53606	-7.28527	-5.04356	-0.537819	-6.15781	#VALUE!	-6.87779	#VALUE!	-19.6372
	L-1	-0.767504	1.69689	-1.48895	1.32969	-0.835221	-5.25622	-1.34832	-6.81689	-2.91771	0.974991	-5.42367	3.37436	3.11854	8.71967	5.29716	0.0676063	-2.14653	-0.211577	0.218332	2.41535	-6.59988	-2.62664	-2.44333	-5.10714	-0.7999	-4.71831	-4.55144	-4.95224	-5.25497	-4.48889	-0.865649	-4.96483	-8.65407	#VALUE!	#VALUE!	-21.4585
	L-2	-0.330822	2.44588	-2.17042	1.81421	-1.526	-4.89463	-0.934883	-7.36376	-2.04084	1.37653	-3.05235	3.27967	3.79553	9.623	5.25391	-1.25736	-3.0894	-2.18235	0.348001	0.906106	-4.32267	-2.48169	-0.984847	-3.07167	-2.56381	-6.30785	-4.23326	-2.87944	#VALUE!	-4.07824	-5.29174	#VALUE!	-5.7542	-4.913	-8.59629	#VALUE!
	L-3	-0.510369	2.63042	-1.40723	1.47222	-0.328589	-4.93612	-1.98812	-5.57007	-2.18874	1.52006	-4.65956	2.52866	1.55464	9.00829	4.6349	-1.33551	-0.684267	-1.14961	0.32743	1.08157	-2.70152	-1.99594	-1.08326	-1.85667	-3.48824	-3.95525	-6.17677	-8.99868	-4.10093	-4.55572	-0.999551	-5.09294	-9.84606	-4.69466	-9.46851	-19.5995
	L-4	0.0905675	2.82715	-0.920581	1.54045	-0.0354897	-4.04511	-1.38985	-5.6488	-1.97111	1.72713	-5.49832	1.89755	1.24715	8.2687	4.90757	-0.571156	-2.50986	-0.288484	0.540293	-0.167792	-4.42133	-1.30252	-0.355847	-1.70821	-3.60673	-4.15424	-4.08849	-5.07639	-5.03272	-3.96538	-1.54422	-6.49418	-10.4108	-5.16963	-9.83064	-21.1881
	L-5	-0.550205	1.75463	-1.72775	1.51506	-0.220144	-5.13012	-1.13653	-6.90648	-2.04058	0.772706	-3.45023	3.17344	2.40296	10.2613	5.05449	-1.68414	-1.84526	-1.25363	0.301043	0.709456	-5.82954	-2.07067	-0.635739	-2.9285	-1.3434	-8.7358	-6.98862	-12.0058	-6.38059	-4.75208	-0.668201	-5.0933	-8.93149	-6.28095	#VALUE!	#VALUE!
	L-6	-0.793475	2.63749	-1.37137	1.56151	-0.502033	-5.56877	-2.73513	-5.85381	-3.09614	1.52794	-3.73482	3.71653	2.79121	9.79472	5.25553	-1.93523	-1.11031	-1.58282	0.0827994	0.916167	-2.84811	-1.69746	-0.491912	-2.78823	-2.54321	-5.62089	-3.75159	-3.75409	-3.72082	-4.18952	-4.72481	-6.51351	-10.7083	-4.16409	#VALUE!	-15.0895
	L-7	-1.08036	2.24144	-1.78634	1.4843	0.089949	-5.54258	-1.15699	-6.56693	-2.47111	0.863378	-3.78508	3.13596	4.34092	9.1	4.93278	-0.668067	-2.70678	-1.2708	-0.035579	0.881905	-3.82518	-2.47022	-1.26577	-3.11767	-2.51625	-5.22122	-4.99518	-4.13218	-4.42686	-5.01806	-1.11969	-4.79777	#VALUE!	-4.67995	#VALUE!	-18.4336
	L-8	-0.819225	1.79921	-1.89256	1.71519	-0.18395	-5.20039	-1.64877	-7.43161	-2.24823	0.821918	-3.78149	3.47122	2.80803	9.9857	5.23746	-0.854792	-1.91744	-0.752222	-0.256463	1.14841	-3.85062	-1.77961	-0.612601	-2.54961	-2.53973	-7.95747	-5.9552	-4.4985	-5.99794	-6.55554	-0.870263	-4.57645	-9.3935	#VALUE!	#VALUE!	#VALUE!
	L-9	0.0334603	2.41746	-0.782959	1.81328	-0.360744	-5.02527	-0.868417	-5.49974	-1.47914	1.91457	-4.38789	2.33994	1.84334	8.51069	5.10772	-2.28736	-2.68798	-1.29076	0.698983	-0.00916429	-3.33439	-1.70411	-1.04523	-1.49016	-5.32932	-6.74972	-3.08647	-4.72587	-4.04667	-3.15048	-0.380783	-5.55854	#VALUE!	-6.43377	#VALUE!	#VALUE!
	M-1	-0.328897	1.50071	-0.531968	1.88229	-0.332334	-5.41452	-1.1103	-5.63896	-2.99407	1.25476	-3.86581	3.20635	4.35905	8.732	4.93057	-1.93788	-2.72769	-0.76983	0.210161	-0.423631	-5.49339	-2.02931	-3.01893	-11.3039	-2.79002	-2.8379	-5.54854	-3.51369	-4.1849	-4.38197	-1.33741	-3.7913	-6.54798	#VALUE!	#VALUE!	#VALUE!
	M-2	-0.46302	2.34044	-1.10622	1.47811	-0.677704	-5.83373	-1.14947	-6.29399	-2.10997	1.28138	-4.17221	3.33653	1.59089	9.1828	4.85076	-1.045	-0.510033	-0.961298	0.237268	0.0244601	-4.03917	-1.47333	-4.73896	-4.30748	-2.53254	-2.27949	-6.16064	-5.63394	-6.51114	-4.31529	-0.370475	-6.23099	-8.20922	#VALUE!	#VALUE!	-17.5306
	M-3	0.18074	2.15876	-0.975484	1.62666	-0.130622	-5.19761	-2.05768	-5.04889	-2.79735	1.49396	-4.98488	1.95356	2.76196	8.43021	5.10764	-1.1394	-0.185745	-1.22591	0.477944	-0.447862	-4.72458	-2.14995	-2.92497	-6.14458	-2.7894	-2.31516	-6.03556	-7.36846	-5.07137	-3.86013	-1.69129	-4.78149	-9.42662	-7.73189	#VALUE!	-22.3047
	M-4	-0.357371	2.17835	-1.04126	1.78616	-0.893982	-4.96187	-1.14026	-5.97365	-2.44783	1.51214	-4.20665	2.02275	1.894	8.60591	5.22401	-2.06438	0.0636221	-1.29688	0.69392	0.403259	-5.08072	-1.92254	-3.5521	-5.83311	-3.63704	-2.21899	-8.82566	-5.83433	-3.74489	-3.76867	-1.45113	-5.54382	-7.41238	-5.68769	-7.64794	#VALUE!
	M-5	-0.0696685	2.14924	-0.764511	1.77961	-1.22665	-5.1086	-1.20959	-6.1262	-2.91191	1.4039	-4.17379	2.07463	3.52572	8.62253	5.23103	-1.72346	-0.935398	-0.744042	0.274949	-0.0677945	-5.12574	-2.13851	-2.40158	-8.74286	-14.3657	-2.83106	-6.01427	-3.82963	-4.52262	-7.28598	-11.2284	-3.47649	-6.39214	-5.3794	#VALUE!	-18.7254
	M-6	-0.580987	2.14782	-1.57729	1.43847	-0.97858	-5.76174	-1.48517	-6.29144	-2.86872	1.14735	-3.42129	3.67376	3.05131	9.40664	5.38023	-1.57405	-1.59279	-1.23792	-0.158399	1.28281	-4.84026	-1.26533	-4.15276	-6.60236	-20.1377	-2.81518	-7.87977	-5.63771	-9.45767	-4.76266	-0.751431	#VALUE!	-8.84398	-7.63799	#VALUE!	-17.7627
	M-7	-0.649624	2.18577	-1.37983	1.62343	-0.10677	-5.34988	-2.04586	-5.07983	-2.00998	1.2627	-4.42463	2.93341	2.42948	8.91064	5.48541	-1.23878	-1.90002	-1.27218	0.522053	0.104495	-4.68347	-1.60735	-3.33063	-4.31707	-2.7794	-3.18262	-6.66966	-4.84684	-4.62179	-5.23776	#VALUE!	-5.24055	-8.92521	-7.40671	#VALUE!	-19.884
	M-8	-0.658932	2.02492	-1.5703	1.43141	-1.82069	-5.57583	-1.18974	-6.23196	-2.28102	1.30729	-3.81736	4.32533	3.02004	9.18897	5.18691	-1.03897	-1.94342	-1.57287	0.189703	1.0265	-5.41841	-2.98581	-3.50334	-5.45629	-2.32518	-2.44967	-8.69333	-10.0919	-5.29318	-9.27952	#VALUE!	-8.92206	-7.8165	-6.3292	#VALUE!	#VALUE!
	M-9	0.233639	2.3877	-1.04059	1.6884	-0.459954	-5.19616	-1.36802	-6.56278	-2.9283	1.66852	-3.92597	2.97428	2.2918	9.4243	5.07812	-2.30519	-1.37256	-1.13951	0.602974	-0.0506883	-5.46624	-1.77768	-2.42345	-5.25504	-7.40323	-2.31364	#VALUE!	-5.11025	-3.36652	-4.39155	-1.90364	-7.67559	-10.7947	#VALUE!	-8.12598	-17.1021
	N-1	-0.308852	2.74597	-0.804341	1.63733	-0.441141	-4.74155	-1.99279	-5.27915	-2.46845	1.69912	-4.2795	3.71866	1.72776	8.61831	4.6762	-2.06184	-0.772154	-1.45397	0.294028	-0.513629	-4.39904	-2.05124	-1.99636	-2.936	-4.03509	-2.66042	-5.06347	-5.99528	-5.79825	-4.33475	-7.38388	-5.00453	-7.60838	-5.49317	-9.74398	-18.7544
	N-2	-0.531158	2.20078	-1.12535	1.36994	-0.789139	-4.78131	-1.66811	-6.5489	-2.14735	1.72779	-3.78756	2.86556	2.39933	9.07479	5.05018	-1.43373	-1.42171	-0.788797	0.140392	0.194358	-5.24123	-2.63262	-5.8738	-4.63053	-1.59712	-5.34969	-4.53217	-5.92979	-6.3529	-6.37059	-0.320203	-5.09547	#VALUE!	-5.66914	-9.45923	-18.4833
	N-3	-0.0112794	2.01149	-1.14616	1.68983	-1.91905	-5.0151	-2.76675	-6.16069	-2.26008	0.99569	-3.61398	2.80983	3.68671	9.19006	5.44853	-0.940737	-1.48418	-0.974427	0.0473043	0.412987	-7.42849	-1.80237	-5.44337	-3.74217	-2.4258	-4.1443	-4.17264	-7.29354	-5.92139	-4.05162	-0.212036	-6.65024	#VALUE!	-6.54795	-6.799	-20.22
	N-4	-0.133756	1.55726	-0.738319	2.00178	-1.82726	-5.09845	-0.850732	-6.66893	-2.28311	0.81706	-3.79203	2.58628	2.90522	9.6983	5.16727	-2.02051	-1.73527	-0.910549	-0.0175574	1.3433	-6.56801	-1.84353	#VALUE!	-4.6407	-2.6724	-8.83421	-13.6088	#VALUE!	-6.89796	-5.1861	-5.51134	-5.39378	#VALUE!	-6.39979	-6.14262	#VALUE!
	N-5	-0.371076	1.71815	-1.22278	1.69046	-0.932345	-4.33945	-1.47451	-7.79087	-1.95639	1.23319	-4.24665	3.07623	3.18403	9.4454	5.32857	-2.46723	0.0579457	-1.76528	-0.22655	1.05916	-5.15892	-2.16545	#VALUE!	-4.10972	-2.21424	-6.74191	-7.36167	-4.81126	#VALUE!	-4.57595	-8.68069	-5.17535	-10.4545	-5.64521	-8.98424	-17.6131
	N-6	-0.0462415	2.01962	-1.45736	2.1034	-1.07173	-4.89652	-0.968799	-6.95499	-1.46623	1.10816	-4.0446	3.56464	2.50285	9.24793	5.52925	-2.19459	-0.0287075	-2.59301	-0.396921	0.0438356	-5.3553	-3.13141	#VALUE!	-4.36844	-3.44671	-6.12298	-4.35616	-3.66452	-4.10582	-4.24142	0.728996	-4.6466	#VALUE!	#VALUE!	-7.05176	-18.431
	N-7	0.124418	2.3155	-1.3351	1.73303	-0.647368	-5.59285	-2.2013	-7.08619	-3.282	1.23327	-3.56765	3.1865	3.09268	9.31603	5.51302	-0.999889	-0.860283	-1.25609	-0.316782	0.63106	-5.37864	-2.05781	-5.98002	-4.50552	-8.22674	-9.758	-6.66379	#VALUE!	-4.67419	-6.44167	#VALUE!	-6.58369	-8.67268	#VALUE!	#VALUE!	#VALUE!
	N-8	0.413379	1.30606	-1.84781	1.91705	-1.1183	-4.91726	-1.18826	-6.38822	-3.16592	0.281089	-3.04637	2.99033	4.56361	9.37837	5.83205	-2.86662	-0.547226	-2.18043	-0.422203	1.00667	-5.87615	-0.926169	-3.96589	-5.78024	-2.28903	-5.4661	-13.1913	-5.52222	-2.73099	-5.40314	-2.48953	-7.95025	-9.18882	#VALUE!	-8.16626	#VALUE!
	N-9	-0.491222	1.58507	-1.12557	1.46249	-2.84051	-5.5166	-1.85954	-6.29065	-2.33731	0.374189	-3.50359	3.98613	3.79301	9.70759	4.83001	-1.49587	-0.714311	-1.20863	-0.522378	2.1677	-4.09007	-2.91575	-6.90792	-3.32132	-2.22251	-4.18453	-9.84148	-5.72142	-5.07099	-4.89601	-0.436683	-6.53443	#VALUE!	-5.02409	-6.99425	-15.9667
	O-1	-1.14224	0.653138	-2.07248	1.49076	-1.69826	-5.26068	-2.50451	-7.18655	-2.64979	-0.0301422	-4.44762	4.38617	4.78699	9.37792	5.17496	0.365499	-1.04717	-0.40568	-0.632213	2.8419	-7.06041	-3.54391	-4.0383	-12.3389	1.1543	-5.50375	-5.44801	-3.06758	-3.13296	-6.62801	0.118592	-3.79843	#VALUE!	-5.19183	#VALUE!	#VALUE!
	O-2	-0.517812	2.60985	-1.73126	1.79668	-0.295041	-4.03875	-1.28216	-4.96704	-2.19574	0.845295	-3.87406	3.62573	2.83096	9.26564	5.00099	-1.49413	-3.38028	-1.74406	-0.52122	0.0663981	-4.21676	-2.63366	-1.52009	-6.23038	-5.7617	-5.19667	-7.43423	-6.76034	-5.01888	-4.66368	-1.6814	-3.54437	#VALUE!	-5.03557	-6.51425	#VALUE!
	O-3	-0.471725	2.85021	-1.28308	1.69286	0.481626	-3.75384	-1.40444	-4.36316	-2.5627	1.07029	-4.89252	2.39621	2.13152	8.65043	5.12697	-1.43079	-2.88517	-1.57743	-0.287447	0.512201	-4.38677	-2.63582	-1.99097	-6.16907	-3.58886	-6.63058	-5.44782	-6.23996	-8.36274	-5.98556	-0.917415	-5.69588	-12.7335	-6.03861	-13.465	-19.2446
	O-4	-0.639842	2.77248	-1.41309	1.91609	-0.58863	-4.26355	-0.891424	-4.90447	-2.44225	0.701396	-4.03882	2.65504	2.20363	9.61051	5.01363	-1.37344	-3.18331	-1.91319	-0.237633	1.01687	-4.8018	-3.0459	-1.86707	-6.40417	-1.52031	-4.50101	-3.43537	-8.85201	-5.3098	-4.12256	-0.146876	-4.12284	-9.59673	-5.54264	#VALUE!	#VALUE!
	O-5	-0.421565	2.27554	-2.43678	1.8828	-1.0118	-4.08494	-1.57253	-6.45452	-3.11987	0.553198	-3.13654	3.84131	3.13301	9.9801	5.09565	-0.861081	-0.788746	-2.86292	-0.317777	0.307449	-4.08842	-3.81863	-4.92571	-5.17931	-3.30143	-6.21226	-7.45452	-4.17009	-3.76694	-4.12606	-0.401785	-4.07998	#VALUE!	-5.93572	-11.4644	-20.0221
	O-6	-1.32479	1.99169	-2.09347	1.59867	-1.4173	-4.62389	-1.66943	-7.92594	-3.24574	-0.0914336	-2.67548	4.20763	4.26397	10.0742	5.32617	-1.16693	-1.15988	-1.75253	-0.259263	1.94374	-3.85337	-3.14305	-2.61433	#VALUE!	-2.34823	#VALUE!	#VALUE!	-4.3719	-6.94386	-7.89612	-5.42074	-5.88509	#VALUE!	-6.21826	-7.25181	#VALUE!
	O-7	-0.996419	2.15167	-1.89743	1.51313	-0.504102	-5.02352	-0.815781	-5.68562	-2.17932	0.145716	-3.68962	3.24449	3.31058	9.97518	5.02115	-1.03496	-2.34614	-1.77973	-0.747924	1.33865	-3.39667	-2.76501	-2.59926	-4.20591	-0.890961	-6.07903	-5.28605	-14.1772	-4.17283	-3.76837	-0.122141	#VALUE!	#VALUE!	#VALUE!	-8.06764	#VALUE!
	O-8	-1.10284	2.18446	-2.11639	1.79969	-0.921873	-4.523	-0.881426	-6.83399	-4.73281	0.554662	-2.97689	3.79108	4.21594	10.1261	5.03032	-0.71978	-1.2174	-2.17987	-0.10195	0.606008	-3.40822	-4.95508	-2.23833	-8.59815	-7.54936	-9.75145	-6.97203	#VALUE!	-5.31772	-6.15601	1.22576	-5.32793	#VALUE!	#VALUE!	-8.76602	-16.2175
	O-9	-0.504113	2.31812	-1.37462	1.82399	-0.219418	-4.20515	-2.39031	-4.97318	-3.72766	0.540271	-3.05337	3.30152	2.45014	9.70319	5.01434	-1.10812	-1.88179	-1.88668	-0.571667	0.744511	-3.35809	-4.29622	-2.29999	-4.90681	-3.8726	-9.09669	-4.723	-10.1041	#VALUE!	#VALUE!	-7.88513	-5.12955	#VALUE!	#VALUE!	-7.01998	#VALUE!
	P-1	-0.523708	0.198348	-0.729112	1.3157	-0.906063	-4.73364	-1.45121	-6.69453	-4.39873	0.982047	-4.53951	3.57241	4.63023	7.89445	5.55956	-1.5217	1.30329	-0.580865	-0.956772	1.57981	-7.36981	-4.60558	-2.68471	-3.3388	-4.74546	-9.63634	-7.05015	-7.10147	-5.13089	-7.6956	-2.16681	#VALUE!	-11.5329	-5.42623	-7.64786	#VALUE!
	P-2	-1.04103	1.38759	-2.78408	0.756882	-0.656751	-5.21539	-2.72787	-6.17139	-2.72943	0.796447	-4.57333	4.28563	4.16383	8.8247	4.35667	1.44402	-1.63695	-0.377339	-1.25842	3.15621	-4.68642	-3.86368	-2.92056	-3.83575	0.294634	-5.20731	-8.10371	-5.84608	-4.89348	-7.11657	-0.711472	-7.85221	-9.87187	-6.26511	-10.5573	#VALUE!
	P-3	-0.956231	1.96129	-1.3269	1.26229	-0.538096	-4.28236	-2.0268	-5.86925	-3.2036	1.93428	-3.9464	2.91652	3.23401	9.60294	4.8634	-1.03834	-1.27249	-1.1549	-0.567982	0.408636	-6.19518	-4.25046	-2.17511	-1.99827	-0.0740229	-4.06156	-4.62085	-5.1797	-6.18422	-4.35172	-0.695896	#VALUE!	-8.32376	#VALUE!	-12.8447	-19.7212
	P-4	-0.49981	2.28874	-1.33654	1.34384	-0.284509	-3.9846	-1.65836	-5.57294	-2.80221	1.89191	-4.19276	2.81666	2.75169	8.91358	4.82143	-1.66575	-1.14856	-1.59797	-0.494629	0.410771	-4.8828	-2.78174	-1.47558	-1.82469	-2.35289	-3.01867	-3.81261	-5.03666	-3.46328	-5.70246	-0.877343	-6.62654	-8.01849	-13.4056	-8.95441	-17.3647
	P-5	-0.376142	2.15461	-1.21812	1.39646	-0.349921	-4.46769	-1.79988	-6.0827	-2.30461	1.85782	-4.04786	1.97169	2.65908	9.13904	4.63226	-1.74398	-0.839448	-1.2069	-0.187437	0.813715	-4.46458	-3.21991	-1.48119	-1.61904	-3.14563	-3.60269	-6.44095	-5.33131	-4.94639	-5.33582	-3.03238	-4.49704	-10.3502	-5.47957	#VALUE!	#VALUE!
	P-6	-1.33042	1.16651	-1.47823	1.48241	-0.841482	-6.10737	-1.57226	-8.27205	-2.66284	0.917781	-3.13475	3.56382	4.11748	10.2314	4.85043	-0.606376	-0.0886765	-1.45197	-1.24697	2.46352	-3.73542	-8.51145	-2.48257	-4.28379	-2.32745	-6.43291	#VALUE!	-6.76617	-4.83813	#VALUE!	-0.241101	-6.44595	-11.0626	-6.29403	#VALUE!	#VALUE!
	P-7	-0.0490165	1.39976	-1.7705	2.12971	-0.863172	-5.0391	-3.14298	-9.41297	-2.88734	1.20689	-3.40301	3.85614	4.73053	10.6896	5.12029	-1.69632	-0.357305	-2.71061	-0.0793425	2.2788	-13.1978	-3.23353	-1.83848	-4.21363	-3.15207	-6.29761	#VALUE!	-8.0884	-7.39977	-5.65436	#VALUE!	-4.1975	#VALUE!	#VALUE!	#VALUE!	#VALUE!
	P-8	-0.315448	1.34914	-1.9635	1.30731	-1.03986	-5.34865	-1.82113	-7.70429	-2.95703	0.929201	-3.21636	3.78643	4.47995	9.90774	4.94258	-1.10387	0.257332	-2.13153	-1.23211	1.87409	-11.5097	-3.51264	-7.53789	-3.43315	5.90517	-5.08218	-6.11108	-4.39359	-5.12719	-4.40037	#VALUE!	-9.11978	-11.399	#VALUE!	#VALUE!	-19.7701
	P-9	-0.654256	1.55299	-1.69956	1.5563	-1.30977	-5.42073	-2.89206	-8.07487	-3.41047	1.24551	-2.26269	3.82157	4.10856	10.5511	5.06822	-1.20099	-0.188989	-2.31612	-0.146979	1.67323	#VALUE!	-3.18724	-1.92905	-2.86922	-3.92262	-5.02037	-6.87455	-3.75726	-4.25046	-6.55817	0.986135	-4.82218	-8.94696	-5.63586	-8.14713	#VALUE!
	Q-1	-0.172207	-0.218822	0.0927224	1.69172	-0.788426	-4.85696	-1.11216	-6.20376	-3.95717	0.566769	-4.37512	3.36638	3.89419	8.49326	4.93869	-1.33573	-0.50168	1.18872	-0.75239	0.0419629	-10.2018	-2.72153	-2.81016	-4.93259	-6.19764	-6.51281	-7.30228	-12.4576	-6.4462	-4.57829	-2.8413	-3.25257	#VALUE!	#VALUE!	#VALUE!	#VALUE!
	Q-2	-0.326872	0.892799	-0.683993	2.35034	-0.997201	-4.43501	-1.49004	-4.85528	-3.61401	1.47949	-4.56402	2.24975	3.16241	8.7221	4.8269	-0.471296	-3.13261	0.130004	-0.247066	1.0036	-3.37795	-2.92989	-1.92373	-5.20744	-2.11203	-5.46933	-6.19795	-9.01455	-4.07986	#VALUE!	-0.902597	-3.64112	-6.47138	#VALUE!	-11.6543	-15.9836
	Q-3	-0.939939	0.399212	-1.44569	2.12061	-1.38327	-4.65415	-1.24938	-6.36957	-4.69083	0.99576	-2.85046	3.63543	3.61904	10.0976	4.28674	-0.758068	-2.04933	0.269725	-0.79449	1.76102	-4.15723	-3.3407	-2.77066	-7.48494	-2.04116	#VALUE!	-6.81417	-3.84682	-4.78391	-5.45517	1.71121	#VALUE!	#VALUE!	#VALUE!	#VALUE!	#VALUE!
	Q-4	-1.30315	0.835868	-1.19236	1.73335	-1.55837	-3.75194	-2.12759	-5.81035	-2.93972	1.63153	-3.71948	3.03168	3.44315	9.53648	4.49517	-1.06001	-1.84963	-0.407058	-0.857097	1.86951	-7.54494	-2.88137	-2.15433	-4.93966	-2.69981	-8.07401	-5.83516	-4.59561	-4.19469	-4.03596	0.0497035	-6.10591	-9.78704	-6.47249	#VALUE!	-15.9153
	Q-5	-0.75454	1.61358	-1.50039	1.79014	-1.07764	-4.01085	-0.975893	-6.16755	-3.77781	1.26703	-4.50425	2.85511	2.27435	9.24947	4.47336	-0.268198	-1.20046	-0.155137	-1.03925	1.90893	-6.33033	-3.04588	-1.77661	-4.73476	-1.68668	-6.98776	-8.45433	-5.42444	-6.21915	-3.87243	-0.550561	-6.07399	#VALUE!	#VALUE!	#VALUE!	#VALUE!
	Q-6	-1.03857	0.790751	-1.63869	1.90204	-1.73156	-4.05456	-1.69832	-6.51149	-3.05063	1.167	-3.25866	3.95066	2.39323	9.56567	4.63814	-0.60175	-1.46538	-0.205536	-0.724228	1.57187	-3.06143	-4.74331	-2.61628	-4.75371	-3.66604	-5.16796	-5.04562	-12.5041	-6.35347	-3.61432	-0.149437	#VALUE!	#VALUE!	#VALUE!	#VALUE!	#VALUE!
	Q-7	-0.231822	0.866323	-1.69172	2.31617	-2.12465	-3.75153	-1.44494	-6.20474	-7.91068	1.24786	-2.75926	4.72041	2.99516	10.2255	4.98827	0.0465229	-2.55192	-0.540338	-0.644663	2.45002	-11.8604	#VALUE!	-3.4802	-2.68453	-3.8129	-8.92847	-5.93122	-12.5974	-3.66021	#VALUE!	1.16142	-7.83581	#VALUE!	-4.40534	#VALUE!	#VALUE!
	Q-8	-0.982819	0.42312	-2.28229	1.42863	-0.547371	-4.92458	-2.23807	-7.41537	-4.22373	0.503228	-3.7038	3.37044	3.45208	8.89195	4.71	1.5948	-1.65572	0.739345	-0.86743	3.7276	-6.76954	-4.95789	-2.45823	-5.50861	0.49876	-6.5979	-5.43345	-5.78761	-5.29479	-6.00174	3.10382	-5.63794	-8.85499	-4.9323	-8.49993	-16.2621
	Q-9	-0.711735	0.562109	-1.20505	2.16643	-1.02664	-4.90759	-0.512052	-6.03832	-2.74487	2.07798	-4.97743	2.66074	2.86991	9.12619	4.686	-0.311934	-2.19907	0.445258	-0.565768	0.605837	-7.09327	-5.01871	-3.70998	-4.03392	-3.34408	-9.68636	-5.68712	-6.15249	-4.60994	-5.57482	-7.12164	-5.75122	-8.89752	#VALUE!	-8.48333	#VALUE!
	R-1	-0.023029	1.72343	-1.39989	2.09087	-1.80386	-4.81781	-1.47994	-6.78906	-4.33659	1.67105	-3.94607	3.00215	2.33749	9.80098	4.91494	-0.972402	0.331498	-0.399079	-0.382375	0.477702	#VALUE!	-2.65159	-1.94301	-11.0215	-5.50856	-2.99534	-9.29184	#VALUE!	-5.82263	-4.20277	6.8179	-7.80659	#VALUE!	-5.06326	-7.29782	#VALUE!
	R-2	0.143367	1.47258	-1.63485	1.91082	-1.28718	-4.18362	-1.26439	-5.68077	-6.47398	2.09774	-3.47596	2.89745	2.83578	9.47511	4.62751	-0.0648175	-2.20742	-0.214462	-0.150323	1.17742	-3.16299	-1.50675	-2.4015	-6.31553	-3.9697	-5.03291	#VALUE!	-4.96309	-4.18715	-3.48446	0.306356	#VALUE!	-6.42002	#VALUE!	-9.60329	#VALUE!
	R-3	-1.13252	1.30314	-2.01884	1.56632	-1.6189	-4.55967	-1.04053	-7.40285	-4.36172	1.52146	-2.93842	3.59822	2.90886	10.0257	4.44556	-0.503329	0.16051	-1.03832	-0.707887	1.7932	-3.37105	-2.51764	-5.25019	-6.1645	-2.48109	-4.85419	#VALUE!	-8.29306	-7.32482	-4.814	0.832084	-7.3743	#VALUE!	-4.36768	#VALUE!	-16.2188
	R-4	-0.566705	1.79222	-1.93722	1.87741	-0.937268	-3.98787	-1.87948	-5.36174	-3.91093	1.6769	-3.8281	2.05638	1.65336	10.1489	4.51559	-1.04229	-0.691135	-0.442376	-0.183285	1.04767	-4.73812	-2.2787	-2.08035	-4.56609	3.49922	-3.9976	-4.89593	-8.93358	-4.4021	-4.04252	-0.334533	-8.49556	-8.14716	-5.69146	-9.14668	#VALUE!
	R-5	-0.626453	1.32942	-2.37577	2.06017	-3.19212	-3.88851	-1.52263	-6.47973	-6.30403	1.28845	-2.7264	3.79614	3.15539	10.0817	5.09714	-0.0984774	0.562142	-1.23116	-0.684434	1.75915	-5.09449	-3.3197	-3.53075	-7.63582	-3.50807	-3.63398	-5.93972	-5.22703	-4.84786	-2.96954	6.27648	-8.17772	#VALUE!	#VALUE!	-5.35682	#VALUE!
	R-6	-0.0419636	1.44898	-1.63091	2.26658	-3.14418	-4.21805	-2.49328	-6.43626	-5.07427	1.72795	-2.86175	3.18811	3.17997	10.1127	5.36098	-1.39376	-0.0831661	-0.482282	-0.696006	1.27066	-4.20102	-4.50856	-4.69662	-4.18487	-0.944151	-4.23351	-8.44255	#VALUE!	#VALUE!	-6.83015	0.119683	-5.12953	#VALUE!	#VALUE!	#VALUE!	#VALUE!
	R-7	-0.893158	1.34268	-1.74509	1.65211	-2.60494	-4.20016	-1.02276	-6.51625	-3.57785	1.3838	-3.46857	3.28294	2.68539	9.53506	4.78752	0.523323	-2.38036	0.248089	-0.132169	1.10039	-7.61097	-1.92476	-3.57745	-4.93298	-3.20565	-4.25617	-6.59166	-4.77041	-6.9253	-5.46506	-0.242476	-3.70618	-6.1986	-4.78997	#VALUE!	#VALUE!
	R-8	-0.554161	1.09128	-1.48964	1.52891	-1.90955	-4.81522	-1.58282	-6.41294	-2.50432	1.19228	-3.53319	3.63101	2.72123	9.28687	4.97889	-0.123232	-1.02962	-0.412807	-0.664031	0.601053	-4.54833	-2.71832	-3.16181	-9.4825	-3.38937	-6.38388	#VALUE!	-6.53076	-5.77028	-4.6675	2.26563	#VALUE!	-7.103	#VALUE!	-14.5666	-14.5103
	R-9	0.451089	0.813766	-1.17026	1.89437	-1.71039	-4.44674	-1.29428	-6.81019	-3.00486	0.801593	-3.3184	2.92625	2.20557	9.65355	4.58539	-1.0618	-0.931181	-0.27995	-0.725512	1.42198	-7.26927	-1.29902	-2.11027	-4.87923	-2.30852	-2.67401	-7.55286	-5.33464	-3.87932	-3.9376	1.469	-3.85548	-6.80847	-5.7405	#VALUE!	#VALUE!
	S-1	-0.52206	2.03525	-1.29607	2.29042	-1.16796	-4.33412	-1.29125	-5.85086	-3.02232	1.44064	-3.61244	3.43351	2.41815	9.62977	5.21963	-5.00708	-1.39607	-0.393053	0.587455	0.838454	-3.02685	-3.17292	-1.58147	-4.56176	-5.59217	-3.71111	-3.54365	-5.55463	-3.531	-5.18432	1.08083	-8.65605	-7.47532	-5.92197	#VALUE!	#VALUE!
	S-2	-0.0148519	2.00123	-1.24429	2.21313	-1.49401	-4.53642	-1.09098	-7.92343	-3.76736	1.82541	-3.00704	3.32333	3.00392	10.7495	5.03932	-0.619947	-6.98218	0.120404	-0.00580266	2.41003	-3.22085	-6.35875	-1.64963	-3.93725	-2.51608	-3.31908	-9.38297	-5.65675	-5.19153	-4.44679	1.05202	-4.47396	#VALUE!	-4.19602	#VALUE!	#VALUE!
	S-3	-0.0416821	1.15167	-1.6531	2.32112	-2.02878	-4.50165	-0.73214	-8.23181	-2.86549	1.07256	-3.24835	3.52455	1.89865	9.92092	5.09789	-0.132542	-3.17002	-0.496019	0.262855	1.85138	-4.80433	-5.49286	-2.36642	-4.00139	-2.20474	-2.78793	-6.03381	-7.21584	-5.63696	-4.51516	-0.338658	-4.88628	-5.49137	-8.90137	#VALUE!	#VALUE!
	S-4	-0.0352374	1.90252	-1.46152	1.6815	-0.577723	-4.50703	-2.01709	-6.1759	-2.14417	1.45263	-3.90022	2.8616	2.16134	9.49089	4.76348	-1.06157	-2.82492	-0.489114	0.285134	0.595389	-3.51621	-4.18433	-1.42129	-3.55922	-4.21763	-3.06055	-3.448	-5.65056	-5.47967	-6.83766	4.0333	-5.01284	-8.63593	-6.41044	#VALUE!	-20.5082
	S-5	-0.702519	1.28149	-1.9979	1.62596	-1.37456	-4.19771	-1.84077	-7.46238	-2.8729	1.28649	-3.20586	2.60061	3.01343	9.97417	4.88805	-0.386037	-2.17051	-0.179934	-0.22733	1.94821	-4.0173	-5.09746	-1.00165	-4.25166	-1.25904	-3.59374	-4.92154	-5.60616	-3.35129	-6.52603	1.8002	-7.24406	-8.32913	#VALUE!	#VALUE!	-21.9244
	S-6	-0.0424287	1.53562	-1.63492	2.0401	-2.8825	-3.86932	-1.18092	-8.50298	-5.10046	1.46813	-2.70323	3.572	2.83668	10.145	5.53677	-0.543598	-2.88277	-0.192708	0.182435	2.21912	-6.28048	-3.54889	-1.92747	-2.70096	-2.10806	-4.25725	-6.71789	-4.19021	-4.91906	-3.372	1.97932	-7.64718	-11.1974	-4.07845	-12.0677	#VALUE!
	S-7	-0.423914	1.41853	-1.6313	1.6477	-2.42669	-4.22482	-1.1707	-8.42279	-2.16957	1.40221	-3.38053	3.30439	2.67396	9.34014	4.9986	0.83397	-3.41201	-0.20448	0.49528	1.35202	-5.20037	-3.36823	-0.927756	-5.01361	-4.71951	-2.9985	-7.14178	-5.64391	-6.69883	#VALUE!	1.80501	-5.20292	-11.5038	-4.70852	-12.8735	#VALUE!
	S-8	-0.177876	1.75873	-1.75292	1.8895	-1.46573	-4.61827	-1.58786	-7.66167	-4.12474	1.4687	-3.2786	3.6739	2.42078	9.60013	5.40679	0.232484	-3.03118	-0.223654	0.00247071	1.46901	-3.97284	-4.64204	-1.5585	-4.09644	-2.37345	-3.02664	-3.5664	-8.91878	-5.37795	-3.71559	6.2579	-6.59778	-6.3059	-5.99449	#VALUE!	#VALUE!
	S-9	-0.0725268	1.45937	-1.31535	1.82089	-1.65256	-4.29631	-1.99396	-6.83386	-3.1005	1.20786	-3.61847	3.4152	3.67769	9.38012	4.71015	-1.00723	-3.01227	-0.0160335	0.0422839	1.20552	-4.16879	-4.70862	-1.58725	-3.65906	2.5452	-2.85943	-6.50023	-16.5185	-5.04296	-4.82862	-1.03102	-8.05498	-7.64164	#VALUE!	-9.68212	-16.786
	T-1	-0.789028	1.45616	-1.28198	1.96902	-1.02962	-4.85537	-0.878021	-5.7445	-2.23605	1.41395	-4.35956	3.48388	1.76584	9.02304	5.16519	-1.96841	-1.0711	0.436852	-0.713265	0.212968	-3.6809	-2.3426	-1.31866	-3.48318	-2.62552	-4.72199	-4.38728	-4.44941	-5.95721	-4.0379	-1.01579	-4.70274	#VALUE!	#VALUE!	#VALUE!	-16.6453
	T-2	0.385278	1.51118	-1.82957	1.66799	-1.78126	-4.56833	-1.64942	-7.06702	-1.00826	1.20469	-3.5985	2.92512	2.28443	9.85362	4.77509	-0.152406	-2.69842	-1.05478	-0.134777	0.935334	-4.62875	-3.4108	-1.68654	-3.01424	-3.09424	-5.40151	-5.38334	-5.44264	-5.49359	-3.90754	0.56341	-5.14054	-8.14016	#VALUE!	#VALUE!	#VALUE!
	T-3	-0.0402477	1.0462	-2.72993	1.68416	-1.03629	-4.42827	-1.87255	-5.80179	-2.10339	1.17793	-3.29693	2.68153	2.69174	10.1756	4.55093	-0.966759	-1.76532	-0.990573	-0.912455	1.93643	-4.4864	-3.56392	-2.21185	-2.94124	-2.45845	-5.16277	-4.8795	-5.10987	-3.36944	-4.93745	0.968054	#VALUE!	-12.9976	-6.10337	#VALUE!	#VALUE!
	T-4	-0.35421	1.26983	-2.06334	1.33183	-0.592914	-4.70665	-1.27288	-7.07954	-2.97392	1.00866	-3.75831	3.77526	2.60142	9.90073	5.02106	-1.42514	-1.05537	-0.0837795	-0.3046	0.761873	-4.29055	-4.31162	-3.23035	-2.80163	-1.95135	-13.9944	-7.31752	-5.47783	-6.48229	-6.13012	0.044349	-9.12548	-10.6676	#VALUE!	-7.7708	-15.1778
	T-5	0.0371516	1.59393	-2.58887	1.99058	-1.49444	-4.30232	-1.29722	-6.79542	-2.24657	1.16257	-3.29697	3.13132	2.06157	10.2092	5.08269	-1.72912	-2.04053	-1.013	0.0120777	1.52333	-4.70246	-4.46875	-2.3036	-4.79351	-4.87058	#VALUE!	-3.07375	-6.19626	-4.29622	-4.84283	0.371198	#VALUE!	-12.3042	-4.44907	-7.88933	#VALUE!
	T-6	-0.737611	1.02483	-2.47043	1.707	-3.09948	-5.00043	-1.18206	-6.45525	-2.32667	0.781909	-2.66624	3.2305	2.88638	10.3372	5.08835	-0.537746	-1.52098	-0.193682	-1.10543	2.23983	-4.25471	-4.17048	-1.1828	-4.41696	0.832092	-5.01615	-7.63005	-9.71137	-6.58549	-4.24209	-2.2099	-2.91494	#VALUE!	-5.21555	#VALUE!	#VALUE!
	T-7	-0.0912825	1.12952	-2.15291	1.48472	-1.03344	-5.34368	-1.32434	-7.40025	-1.96083	0.944373	-3.51008	2.63528	2.83415	9.66388	4.98016	0.410707	-1.49229	-0.670727	-0.956711	1.85373	-3.46375	-2.6132	-0.779129	-3.49142	-1.72508	-6.52703	-5.46953	-5.27896	-7.47833	-4.11322	1.63207	-8.33129	#VALUE!	#VALUE!	#VALUE!	#VALUE!
	T-8	-1.48221	1.30599	-2.09327	1.70026	-1.692	-5.3372	-1.96921	-7.75878	-2.69769	1.03033	-3.36434	3.18915	3.23895	9.93877	5.00167	-0.19561	-1.06372	-0.180892	-0.0884128	2.51823	-10.2327	-5.91482	-1.2783	-2.58134	-1.59965	-10.027	-4.77116	-5.60086	-4.00864	#VALUE!	0.97376	-7.68969	#VALUE!	-6.13679	#VALUE!	-21.3728
	T-9	0.487687	1.38311	-1.97401	2.12668	-2.4703	-4.65507	-1.5346	-5.24852	-2.50668	1.19689	-3.28634	2.43811	2.35222	10.1777	5.96182	-1.85385	-0.963799	-1.83	-1.44227	1.64122	-3.7776	-3.33978	-3.18039	-8.70782	-4.2867	-5.24347	-7.60752	#VALUE!	-3.9969	#VALUE!	2.32784	#VALUE!	#VALUE!	#VALUE!	#VALUE!	-17.5384
	U-1	-0.769318	1.49409	-1.57878	1.69103	-1.50268	-4.60931	-1.65088	-6.28941	-1.86044	0.879624	-4.33683	3.46008	1.67258	9.17131	4.42147	-1.49157	0.451221	-0.0779474	-0.938391	1.86416	-4.68075	-5.35271	-2.00556	-7.46156	-6.76045	-4.2374	-6.02992	-6.54562	-5.03569	-4.43131	0.355956	-7.37554	-9.75891	-6.45918	#VALUE!	#VALUE!
	U-2	-0.914147	1.64253	-2.61961	1.57453	-0.884762	-4.96704	-1.27028	-6.35032	-2.74036	0.8937	-3.89809	3.08345	2.49487	10.5827	5.22674	-0.881831	-0.582122	-1.33705	-0.895158	1.84228	-5.25198	-3.20021	-3.01587	-6.95857	-2.16479	-6.6209	-4.52736	-5.75574	-6.15537	-5.14647	1.7112	-6.60613	-13.2287	-5.35171	-7.16538	#VALUE!
	U-3	-0.367101	1.58702	-2.04972	1.84318	-1.27775	-4.31882	-1.93572	-6.67931	-2.55841	1.20192	-3.87006	2.22146	1.40526	9.54537	4.74662	-0.0161292	-0.643409	-0.129139	-0.315208	1.60996	-4.38707	-5.57684	-2.6211	-4.11561	-0.859676	-7.29031	-5.41885	-7.1707	-4.16158	-3.56404	-0.378342	-4.77193	-16.8307	#VALUE!	-8.18213	-18.2607
	U-4	-0.557585	2.19713	-1.71797	1.38467	-1.49304	-4.29563	-2.12316	-6.43935	-2.84694	1.26034	-3.96322	2.94149	2.24214	9.17537	4.6716	-0.676319	-0.678259	0.0142329	0.00196753	0.902517	-3.56934	-6.40402	-2.27202	-4.01743	-0.240927	-3.61261	-7.5097	-5.33463	-7.59289	-3.9844	-1.66031	-5.44595	-8.47031	-4.94808	-9.1233	#VALUE!
	U-5	-1.303	1.87603	-1.47824	1.28054	-2.46248	-4.32812	-0.920743	-6.26669	-3.5542	1.23024	-3.25208	2.54927	2.22	9.94324	4.7352	-0.200154	0.112058	-0.820323	-0.191852	0.831287	-5.32597	-4.7733	-2.66046	-3.65982	-2.7545	-6.72444	-6.71922	#VALUE!	-8.1579	-5.8347	0.536882	-5.88313	-8.98586	#VALUE!	#VALUE!	-18.0012
	U-6	-0.863038	1.46064	-2.3535	1.4176	-0.680462	-4.84884	-1.61373	-8.57169	-3.39494	0.70064	-3.23709	2.92643	2.78573	9.967	4.64241	-1.08156	0.54958	-0.522382	-0.293354	3.01054	-3.30872	-4.96527	-2.49012	#VALUE!	-4.88894	-7.10107	-5.055	-5.26041	-5.1229	#VALUE!	0.72861	-7.98255	-7.26124	-5.09542	-9.61817	#VALUE!
	U-7	-0.901289	1.36686	-1.34471	1.8552	-2.0067	-4.44392	-2.43625	-7.26669	-1.69914	1.10631	-3.39188	2.92025	3.09029	9.85149	5.08614	-0.785479	-1.18159	-0.711245	-0.172123	1.06446	-5.07323	-5.36833	-2.26884	-4.94749	-3.28349	-4.79265	#VALUE!	-5.72506	-7.98417	-3.4921	-0.588217	-5.64322	-7.41035	#VALUE!	#VALUE!	#VALUE!
	U-8	-0.147415	1.50082	-1.93825	1.53971	-3.64677	-4.61232	-2.03387	-7.10585	-2.47211	0.823208	-2.85447	3.2828	2.75889	10.7791	4.86829	-0.663205	-0.224552	-0.948478	-0.353641	1.44808	-6.22412	-6.19306	-2.16276	-3.38569	-5.00473	-8.97573	-5.33104	-10.4364	-6.33863	-4.18398	-3.52877	-6.20563	#VALUE!	#VALUE!	#VALUE!	#VALUE!
	U-9	-0.676525	1.11005	-1.56082	1.48804	-2.08159	-5.46502	-2.71049	-7.48699	-3.33119	0.796645	-3.06713	3.58431	3.79988	10.1114	4.91103	0.0631348	-0.376442	-0.0524924	-0.430549	1.37469	-4.48506	-5.73132	-2.14862	-7.10971	-1.63132	-7.24399	-3.18772	-4.33725	-3.67317	-4.84269	8.48266	#VALUE!	-9.25489	-5.91596	#VALUE!	#VALUE!
	V-1	-0.288148	1.47649	-1.17855	2.10825	-1.1739	-3.98681	-0.882394	-5.85539	-2.89087	1.42799	-4.34114	2.89313	1.70114	8.80513	4.34028	0.164002	-2.66936	-0.0125081	-0.118111	0.48077	-5.31651	-2.64423	-2.37164	-5.32925	-4.96301	-3.35287	-5.68139	-7.43027	-4.92888	-3.97982	-0.21801	#VALUE!	-6.31524	-5.7735	#VALUE!	#VALUE!
	V-2	-0.390657	2.33295	-1.9582	1.78204	-0.877469	-3.94403	-1.68832	-5.50297	-2.9405	1.64437	-4.49254	2.15332	1.97768	9.63636	4.26483	-0.568815	-2.59222	-0.396226	0.0511932	1.50921	-4.21924	-2.76288	-1.23461	-4.4146	-2.63032	-2.71177	-4.40655	-6.83031	-4.48458	-4.7799	-0.692724	-4.94719	-7.8718	#VALUE!	-6.64422	-16.7572
	V-3	-0.766537	1.6851	-1.5547	1.95996	-1.36082	-3.54678	-1.09013	-5.51986	-2.6113	1.61009	-3.69725	2.41182	2.91508	9.27068	5.18718	-1.21941	-3.49171	-0.980385	-0.331036	1.13	-3.54027	-2.51073	-1.52555	-3.71546	-6.15256	-3.56259	-5.89114	-6.49799	-4.60468	-3.93641	-1.19974	-4.66767	-6.59284	#VALUE!	-10.1124	-18.0982
	V-4	-0.102472	1.50036	-1.19376	1.75233	-1.47177	-4.13892	-1.81585	-6.45011	-3.05993	1.54042	-3.82582	2.39935	2.95111	9.03896	4.37155	-0.168228	-2.0172	0.226247	-0.0432109	0.50695	-4.54375	-2.89898	-1.84895	-3.16913	-4.51423	-3.23267	-4.36311	-7.18446	-5.80851	-4.58943	0.43103	-3.86254	-8.11731	-6.06824	-10.5977	-17.6668
	V-5	-0.422648	1.16131	-2.17197	1.7631	-1.68754	-3.64786	-2.09245	-7.57784	-4.1706	1.19642	-3.32252	2.88176	2.64951	10.0758	4.69408	-0.193342	-0.644478	-0.320861	-0.35175	2.18192	-5.19473	-3.07927	-1.73624	-4.0926	0.308483	-3.10102	-7.10336	-6.03238	-4.02139	-4.50228	-3.20729	-5.87066	-6.30156	#VALUE!	#VALUE!	#VALUE!
	V-6	-1.0288	1.5309	-2.22176	1.68228	-1.49195	-4.48925	-1.80536	-6.70872	-2.93237	0.710753	-3.42217	3.57802	2.61464	9.67145	4.57746	0.715936	-0.561587	-0.880925	-0.408924	0.870395	-5.81914	-2.57544	-1.56832	-10.4679	-3.19694	-4.49891	-6.21325	-7.25395	-4.68258	-5.19002	0.985328	#VALUE!	-6.18352	#VALUE!	#VALUE!	#VALUE!
	V-7	-0.272868	1.31509	-1.22967	1.72238	-1.62035	-4.54614	-1.59505	-6.63377	-3.213	1.54183	-4.12105	2.52837	2.95981	9.29047	4.63325	-0.394744	-1.79787	0.250369	0.117304	1.06564	-3.76898	-2.71258	-1.60941	-5.957	-3.14693	-2.69944	-8.9339	-6.08105	-5.96537	-5.49082	-0.0766217	-7.67751	-6.84583	-6.53677	#VALUE!	-14.7705
	V-8	-1.33358	1.41827	-1.11226	1.54024	-2.35785	-3.9439	-2.95505	-7.78825	-2.5453	1.18031	-2.74655	3.09444	3.93497	10.3785	4.95678	-0.0753773	-2.76924	0.00317849	-0.353215	1.47391	-4.47997	-4.59292	-1.42355	-5.54011	-1.66327	-3.86572	-5.65317	-4.2029	-4.39867	-5.32923	0.48255	-5.06206	-6.70983	#VALUE!	-8.42098	-17.8258
	V-9	-1.00509	1.5604	-1.5545	1.52785	-1.65983	-4.18047	-1.47779	-6.92709	-4.00452	0.889599	-2.78548	3.56616	2.83478	9.81641	4.86049	0.13768	-1.92203	-0.335062	-0.658687	1.31719	-6.36037	-4.71641	-2.00936	-4.59922	-2.28078	-4.24199	#VALUE!	-5.07719	#VALUE!	-4.97688	2.11443	-6.27033	-13.1753	#VALUE!	-8.46709	#VALUE!
	W-1	0.087492	1.36931	-0.931871	1.79508	-1.64444	-3.89116	-0.560983	-4.67528	-3.09227	1.41292	-4.11626	1.97399	2.48792	9.73027	4.88802	-0.840184	-4.82355	0.478725	-0.0454376	0.3977	-4.5357	-3.13019	-4.03782	-5.43666	-3.30427	-1.23168	-5.53668	-9.04184	-6.68351	-3.81194	-0.765983	-4.01435	-6.64615	-5.5851	-13.1909	#VALUE!
	W-2	0.140365	1.89791	-0.87305	1.76971	-1.31631	-3.79114	-2.61746	-4.60424	-3.05521	1.43633	-3.68107	2.54821	2.21211	9.44471	5.12702	0.0710072	-5.25542	-0.183494	0.05536	0.67467	-5.77006	-2.55553	-5.43622	-3.60125	-4.99581	-1.26556	-6.98978	-8.65668	-4.44573	-4.84228	7.4086	-4.69123	-5.65324	#VALUE!	-12.4312	#VALUE!
	W-3	-0.0620733	1.06831	-1.78282	1.29611	-1.0472	-4.43473	-1.34306	-6.19856	-2.81743	0.668181	-3.00149	3.10258	3.12385	10.2864	4.6986	-0.543632	-3.61693	-0.878205	-0.922343	2.40441	-4.75957	-2.95684	-3.76285	-5.38917	-2.53958	-3.08019	-5.18224	-4.2025	#VALUE!	-5.40974	-0.160924	-5.11228	-7.50572	-5.03716	-7.01098	-18.8352
	W-4	-0.752504	1.28441	-1.64283	1.14996	-2.29979	-3.82975	-1.76755	-5.11109	-1.85463	1.04654	-3.03556	3.56786	3.6022	9.76361	4.6989	-0.228848	-4.32976	-0.347055	-0.641022	0.726917	-6.00349	-5.44646	-3.25091	-3.90694	-3.96499	-1.64107	-7.18132	-3.96324	-6.63332	-5.57232	0.933835	-7.6997	-5.38843	-5.89531	-7.97918	-18.3756
	W-5	-0.427282	1.25329	-2.73593	1.52732	-4.95573	-4.26585	-1.01392	-5.22531	-2.15895	0.583136	-2.65977	3.23148	3.52787	10.6368	4.94408	0.520141	-3.97044	-0.771215	-0.340949	2.30123	-7.68551	-3.9153	-3.38759	-4.86273	6.11336	-2.87637	-5.79267	-10.7918	-4.95023	-4.62067	-0.283342	-8.0082	-5.33514	-5.18834	-10.2648	#VALUE!
	W-6	-0.63596	1.28344	-1.53003	1.76446	-2.72799	-4.44118	-1.67576	-6.25482	-2.07391	1.05776	-3.05903	3.21795	3.06036	9.75968	5.11717	-0.277686	-2.75705	-0.248801	-0.75367	1.17505	#VALUE!	-2.32318	-3.29323	-3.97879	-4.03304	-3.08426	-6.25614	-3.03805	-6.89849	-4.05233	6.83333	-4.57334	-8.28868	-4.90289	#VALUE!	#VALUE!
	W-7	-0.0382822	0.738653	-1.40071	1.79678	-5.36289	-4.81675	-1.67455	-6.75152	-3.00383	1.34018	-2.85412	3.50699	3.81833	10.4554	5.6384	1.33755	-3.92028	-0.0639433	-0.228369	1.48292	-4.86056	-3.74206	-2.78424	-2.97734	-3.4247	-3.27957	-3.51692	-5.58109	-3.9952	#VALUE!	0.743206	-6.00298	-4.41325	#VALUE!	-8.50255	#VALUE!
	W-8	-0.176444	1.17137	-2.38055	1.67481	-3.43836	-4.23137	-0.992413	-5.84561	-3.49424	1.20475	-2.64983	4.7195	3.46557	10.272	5.13672	-0.638064	-3.47678	-1.36426	-0.550999	1.59419	-3.13027	-3.63084	-4.12762	-4.9881	-5.22322	-2.33894	-15.6948	-10.5296	#VALUE!	#VALUE!	2.11724	#VALUE!	-6.47583	-4.46024	-6.43403	-15.9329
	W-9	-0.257173	1.53649	-1.51586	1.88883	-1.35328	-4.64529	-1.55992	-5.29837	-2.69717	1.00895	-3.19555	2.45878	1.94235	9.76296	5.43164	-0.328768	-4.02293	-0.125192	-0.113432	1.08293	-5.05311	-2.44799	-4.05133	-3.24366	-0.241052	-2.65798	-7.17895	-4.05474	-5.40231	-5.99666	0.62379	-4.21406	-6.08877	-7.86104	-6.80126	-20.7808
	X-1	-0.547769	0.819651	-1.84528	2.28381	-0.896443	-3.94148	-1.07305	-6.49127	-3.23439	0.591083	-4.29717	2.5292	3.81009	10.0202	5.46261	-0.343359	-2.53652	-0.46572	-0.743238	0.899117	-6.58939	-3.06429	-2.40417	-11.6598	-2.48084	-5.379	-5.8886	-5.32197	-6.37595	-3.99063	-0.915823	-5.04968	#VALUE!	-4.69694	-5.39227	#VALUE!
	X-2	-0.625189	1.53681	-2.12054	1.65537	-0.879918	-4.72939	-1.93545	-6.79878	-2.4281	0.647293	-3.47097	4.10829	3.00353	9.74477	4.95787	-0.343968	-2.84435	-0.494742	-0.365557	1.38301	-4.22303	-5.24255	-4.24761	-6.80486	-2.66568	-6.95306	-3.02515	-4.49386	-6.34738	-5.04654	0.204641	-5.28613	-7.16915	#VALUE!	-7.19213	-15.4045
	X-4	-0.364816	0.877708	-1.68444	1.43542	-1.43642	-4.89441	-1.66398	-6.9092	-2.77335	0.527225	-2.90529	3.56326	3.35535	9.48437	4.65701	-0.573402	-3.92167	0.540971	-0.726738	3.41241	-3.87407	-3.99536	-2.39821	-4.92124	-3.27079	-4.70105	-8.37741	#VALUE!	-6.83949	-5.95334	7.00696	-4.06473	-8.45365	-6.66868	#VALUE!	-18.7726
	X-5	-0.588881	1.2649	-2.62779	2.1447	-1.45091	-3.8298	-2.65791	-7.57324	-3.17918	0.348693	-2.15185	3.12442	3.65893	10.4997	5.73274	0.429231	-2.98155	-1.64918	-0.564478	2.0514	-5.79168	-3.48237	-0.882285	-6.84688	-1.05055	-5.073	-4.15198	-4.86575	-5.57559	-4.15607	1.5318	-8.57994	#VALUE!	#VALUE!	#VALUE!	#VALUE!
	X-6	-0.228803	1.29481	-1.62689	2.01345	-2.05648	-3.92211	-1.5945	-7.07385	-5.2762	0.851092	-2.62879	3.60732	3.24245	10.0045	5.38122	-0.129488	-2.66926	-0.355341	-0.589449	1.75631	-4.95052	-4.99102	-3.25479	-4.00205	-3.30947	-3.73255	-4.30962	-14.7563	-5.73622	-4.18312	0.726143	-3.97643	-11.1089	#VALUE!	-9.38267	#VALUE!
	X-7	0.204729	1.16967	-1.62371	2.12992	-2.41424	-4.42242	-1.39008	-7.12232	-2.21362	1.08357	-3.53254	3.33503	4.21157	9.97282	5.56234	-0.859376	-4.36933	-0.699487	-0.420453	1.39793	-4.879	-5.203	-1.87187	-6.07593	-2.9773	-5.15143	-5.0027	-5.54043	-6.92433	#VALUE!	0.448654	-5.42496	-8.60762	#VALUE!	#VALUE!	#VALUE!
	X-8	-1.31202	0.760233	-1.70542	1.81276	-2.5073	-4.90255	-1.41651	-8.26187	-3.40468	0.348252	-2.57123	5.09652	4.10639	10.4855	5.55382	0.390684	-5.41496	0.11469	-0.644555	3.47222	-3.08682	-5.0389	-2.57669	#VALUE!	-2.41813	-5.69828	-6.82823	#VALUE!	-5.84098	-4.73766	8.30384	#VALUE!	#VALUE!	#VALUE!	-12.5315	#VALUE!
	X-9	-0.323027	1.16011	-2.50404	1.88471	-3.48896	-4.46441	-1.54553	-6.72493	-3.25883	0.622593	-2.33094	3.97628	4.03724	10.6345	5.56402	-0.565644	-2.46829	-1.11311	-0.987302	1.89553	-3.9881	#VALUE!	-1.0789	-6.61747	-1.46858	-5.81554	-3.14994	-3.85544	-5.43243	#VALUE!	1.6489	-3.28378	#VALUE!	#VALUE!	-8.24446	-15.2641
