# Supplementary material for: Diurnal Variations of Human Circulating Cell-Free Micro-RNA
Source: PLoS One. 2016 Aug 5;11(8):e0160577. doi: 10.1371/journal.pone.0160577 (PMC4975411; doi:10.1371/journal.pone.0160577)
Supplement: S3 Table — miR-16 normalized data. (XLSX) [file pone.0160577.s008.xlsx]

## Sheet: 1st 48miRs Norm.w.miR-16
Samples	hsa-let-7b-5p	hsa-miR-7-5p	hsa-miR-15b-5p	hsa-miR-17-5p	hsa-miR-19-3p	hsa-miR-20a-5p	hsa-miR-21-5p	hsa-miR-23a-3p	hsa-miR-24-3p	hsa-miR-27a-3p	hsa-miR-28-3p	hsa-miR-29a-3p	hsa-miR-34a-5p	hsa-miR-92a-5p	hsa-miR-100-5p	hsa-miR-106a-5p	hsa-miR-126-3p	hsa-miR-140-5p	hsa-miR-142-3p	hsa-miR-146a-5p	hsa-miR-146b-5p	hsa-miR-150-5p	hsa-miR-155-5p	hsa-miR-181b-5p	hsa-miR-184	hsa-miR-191-5p	hsa-miR-192-5p	hsa-miR-203-3p	hsa-miR-208a-3p	hsa-miR-221-3p	hsa-miR-222-3p	hsa-miR-223-3p	hsa-miR-342-3p	hsa-miR-383-5p	hsa-miR-409-3p	hsa-miR-451a	hsa-miR-590-5p	hsa-miR-638	hsa-miR-708-5p	hsa-miR-29b-3p	hsa-miR-200a-3p	hsa-miR-200b	hsa-miR-15a-5p	hsa-miR-208b-3p	hsa-miR-375
A-1	-4.61884	4.24472	-3.98221	-1.12019	-4.49849	-2.32007	-2.7654	-6.77163	-1.24578	-4.91069	-0.87826	-6.56498	4.10762	-2.69376	-4.96646	-1.04577	-2.0298	-4.0396	-3.79134	-1.11876	-5.22784	-1.93127	6.58205	-3.62001	4.28838	-2.02939	-7.80892	-3.27858	4.295	-3.69243	-0.339503	1.82142	-7.08327	-2.30786	4.80143	-2.44642	-4.69849	-1.01992	-0.157731	-11.7246	-18.0686	-14.317	-4.94996	-8.94002	#VALUE!
A-2	-5.17513	4.62978	-7.18722	-2.28255	-4.79668	-3.09607	-4.44823	-9.47957	-3.3403	-6.97383	-0.831912	-8.78492	-1.28869	-3.23271	-2.82571	-2.21585	-3.3927	-5.40641	-5.06788	-2.81003	-6.99617	-0.861876	7.24513	-2.72962	5.19913	-3.7579	-7.22471	-4.20526	4.69099	-5.87746	-0.285142	-0.387802	-9.2568	-1.76167	4.93938	-2.05614	-4.93644	-1.4881	1.10402	#VALUE!	#VALUE!	#VALUE!	-3.21758	-9.66797	-8.80089
A-3	-5.39764	3.93773	-5.64408	-2.17119	-4.3305	-2.93337	-4.06504	-8.4911	-2.47304	-5.84011	-1.68086	-7.76869	3.84087	-3.38098	-2.991	-1.91222	-2.68234	-4.74583	-4.76137	-1.86311	-6.19373	-2.19611	6.29849	-4.37552	4.08937	-3.36351	-8.10487	-4.34631	3.90031	-4.63492	-1.27774	0.769081	-8.54061	-2.54551	4.28784	-2.32772	-4.46701	-1.9105	-0.243368	-13.9429	#VALUE!	#VALUE!	-3.68408	-10.1016	-8.4076
A-4	-5.40073	-8.31829	-5.28468	-1.8747	-4.22772	-2.68537	-3.44344	-6.82165	-2.11232	-5.66696	-2.3562	-7.14542	3.96212	-3.23631	-3.87596	-1.69421	-2.08817	-4.83988	-4.13525	-1.67511	-5.66101	-2.41891	6.0064	-4.67583	4.31075	-2.32782	-8.79783	-4.64957	4.16854	-4.60159	-1.45292	1.32962	-8.53761	-2.79762	4.43703	-2.56077	-5.1493	-1.84999	-1.19914	-12.2198	-21.9748	#VALUE!	-3.40417	-10.7537	-9.75016
A-5	-5.04733	5.47019	-5.73635	-2.07058	-4.67756	-2.92465	-4.39999	-7.23753	-2.37907	-6.06832	-0.856422	-8.12462	5.04685	-3.51444	-4.24148	-1.73395	-2.35582	-4.81853	-5.15685	-2.03569	-6.18183	-1.92057	6.62309	-3.75964	5.45409	-2.82812	-8.35011	-4.91263	5.19283	-5.07869	-0.273041	0.889138	-8.44875	-1.7686	5.77767	-2.53605	-4.49811	-1.58285	0.281663	#VALUE!	#VALUE!	-13.9929	-5.47435	#VALUE!	-8.44902
A-6	-5.72134	5.46827	-5.27103	-1.96994	-4.10267	-2.36619	-4.08315	-8.08922	-2.10448	-6.07028	-0.942691	-7.87062	5.06399	-3.19238	-2.2441	-1.74315	-2.46108	-4.65004	-4.44879	-1.72969	-5.95073	-1.45246	7.21263	-3.8392	5.36004	-2.48664	-6.73233	-4.34412	5.50696	-4.6126	-0.257357	1.13368	-8.63904	-1.61129	5.87116	-2.56974	-5.14697	-1.24266	0.219693	#VALUE!	-20.5565	-14.906	-3.19167	-9.95331	-7.05582
A-7	-5.11131	5.21525	-5.90365	-2.04518	-4.35131	-2.69383	-4.0446	-7.24336	-2.36429	-6.05123	-1.20929	-7.85004	-0.0569519	-3.42273	-3.84871	-2.09561	-2.24598	-5.26101	-4.49617	-1.75684	-5.92337	-2.28353	7.54623	-4.33356	5.26735	-2.7164	-8.32168	-5.07639	5.48873	-4.62846	-0.546384	1.20098	-8.77585	-2.1575	6.15128	-2.65701	-5.6553	-2.24363	-0.0590687	#VALUE!	#VALUE!	#VALUE!	-5.13874	#VALUE!	-7.88019
A-8	-5.0175	-7.48155	-5.66251	-2.16898	-4.06746	-2.7887	-3.88961	-8.26786	-2.29199	-5.91305	-2.30938	-7.9374	-8.0811	-3.55474	-10.2739	-2.0793	-2.32583	-5.11074	-4.52292	-1.88546	-5.8816	-2.83024	6.55191	-4.98565	4.66069	-2.68022	-8.29637	-4.70294	4.98885	-4.73069	-0.996955	1.11589	-9.37663	-2.23738	5.26881	-2.3893	-5.6196	-2.07723	-0.891361	#VALUE!	#VALUE!	#VALUE!	-5.80589	-10.5442	-9.32175
A-9	-5.3936	4.04881	-7.85102	-3.05531	-4.69244	-3.59937	-4.68831	-9.50803	-3.69018	-7.10868	-1.84138	-8.00943	-4.7054	-3.9316	-5.52167	-2.98894	-3.92199	-6.11266	-6.09062	-3.31073	-7.18196	-2.67181	6.14917	-4.12317	4.03842	-4.54859	-9.11928	-5.49289	4.42982	-6.40002	-1.46665	0.209802	-8.22665	-2.42688	5.0793	-2.40584	-6.50424	-2.56586	-1.10405	#VALUE!	#VALUE!	#VALUE!	-5.3639	-8.90908	-12.9012
B-1	-5.98594	5.05707	-5.0684	-1.7566	-3.30085	-2.13256	-3.64685	-6.96806	-1.9229	-5.64107	-1.8497	-7.15648	3.90056	-3.15735	-2.24263	-1.52636	-1.89394	-4.28368	-4.0576	-1.34562	-5.40528	-2.70912	6.77486	-4.38958	4.56793	-2.61513	-7.50054	-3.51736	4.52848	-4.99872	-1.17668	1.3753	-8.1897	-1.83026	5.0501	-2.46622	-4.27679	-1.8477	-1.06113	-13.9425	#VALUE!	-14.8246	-3.06901	-6.71454	-8.81521
B-2	-5.65509	4.91017	-4.96194	-1.57607	-3.45666	-1.93718	-3.91933	-7.98544	-2.06306	-5.69503	-1.02659	-7.25271	4.59469	-3.07811	-1.45064	-1.2834	-1.86838	-4.47846	-3.78131	-1.38957	-5.3563	-1.50126	6.71536	-3.61614	4.94426	-2.16696	-7.14962	-3.98158	4.89012	-5.10251	-0.819072	1.5023	-8.07964	-1.43078	4.72383	-2.54828	-4.01658	-1.87617	-0.380715	-12.3203	#VALUE!	#VALUE!	-3.03576	-6.65904	-8.07309
B-3	-5.63692	4.92562	-5.12791	-1.96043	-3.59367	-2.41902	-4.29576	-8.32964	-2.43469	-6.29076	-1.90229	-7.3994	4.34766	-3.27308	-1.55221	-1.92256	-2.27359	-5.02322	-3.94531	-1.95472	-5.98345	-2.29896	6.79542	-4.63067	4.72547	-2.81322	-7.32453	-4.27244	4.46257	-5.51221	-1.33941	0.850412	-8.30895	-1.73151	4.90309	-2.44292	-5.06345	-2.28096	-0.776226	#VALUE!	-16.2097	#VALUE!	-3.07209	-11.9257	-8.38891
B-4	-6.03773	-6.89399	-4.93988	-1.79147	-3.70586	-2.09382	-4.12779	-7.79678	-2.18931	-6.01622	-2.67633	-7.30144	3.93794	-3.36803	-2.15284	-1.56237	-1.94559	-4.53666	-3.8865	-1.67797	-5.49065	-2.76715	5.94211	-4.88574	3.99969	-2.11097	-8.64897	-4.34939	4.07453	-5.11623	-1.75513	1.22493	-8.0445	-2.55934	3.84089	-2.86518	-4.60797	-2.44209	-1.2693	#VALUE!	-16.0999	-13.1861	-3.6561	-7.33225	-8.0594
B-5	-5.24535	4.90037	-4.971	-1.66604	-3.32164	-2.1343	-3.77252	-6.89097	-2.09194	-5.5894	-1.67432	-7.12798	4.7841	-3.12248	-2.67585	-1.5017	-1.74357	-4.21184	-3.82147	-1.42703	-5.23187	-2.59022	6.20531	-4.56847	4.8426	-1.92823	-7.36147	-4.56495	4.82458	-5.17171	-1.17249	1.58929	-8.40187	-1.52757	4.90917	-2.91787	-4.36647	-2.18125	-0.605143	-13.697	#VALUE!	-14.159	-3.65837	-15.1897	-8.18219
B-6	-6.00093	-6.94509	-5.50524	-2.65002	-3.83709	-2.67408	-4.18702	-7.89598	-3.66899	-6.63068	-2.69823	-8.09875	3.35179	-3.26315	-2.98489	-2.38429	-2.71535	-5.27441	-4.2636	-2.68148	-6.35814	-3.97743	4.08741	-7.49865	3.86235	-3.47743	-7.69706	-4.08958	3.56861	-5.85873	-2.62678	0.386523	-8.08785	-2.23607	3.55722	-2.52907	-5.14514	-2.92106	-1.45444	#VALUE!	-17.2077	-14.4534	-4.11015	-8.33838	-8.25675
B-7	-6.48763	-5.49211	-5.12168	-2.0131	-3.97243	-2.45876	-4.42535	-7.53705	-2.71953	-6.56767	-1.27063	-8.41136	4.74976	-3.31936	-2.05011	-1.8754	-2.16926	-4.86029	-4.04707	-2.01338	-6.16167	-1.83507	6.75125	-3.86798	4.99775	-2.25168	-8.06314	-4.8845	5.086	-5.69527	-1.00134	0.852508	-8.41192	-1.63694	5.49371	-2.871	-5.00027	-1.86508	-0.44839	-13.8055	-22.258	#VALUE!	-3.24832	-8.1413	-8.95227
B-8	-5.27543	4.89694	-4.32263	-1.41178	-3.15188	-1.87924	-3.6519	-6.78667	-1.54328	-4.88533	-1.42872	-7.15311	-0.683715	-3.03796	-1.69673	-1.21333	-1.31245	-3.8352	-3.03284	-1.03277	-5.02839	-2.11069	6.91171	-3.3009	4.57479	-1.4304	-8.45927	-3.60754	4.64641	-4.3929	-1.10549	2.25563	-7.51489	-1.76299	4.95308	-3.09116	-3.81007	-1.68156	-0.318218	-15.7953	#VALUE!	-12.0339	-2.62378	-12.8553	-8.62603
B-9	-5.6331	3.71956	-5.00143	-2.05123	-3.49825	-2.52172	-3.71212	-7.2725	-2.15027	-5.81475	-2.45558	-5.93496	3.44063	-4.04811	-4.32664	-1.87637	-2.1598	-4.27312	-3.9844	-1.65325	-5.37066	-2.03935	5.33079	-2.59547	3.343	-2.47305	-8.70681	-4.6569	3.73721	-5.34355	-1.76804	1.89136	-6.0516	-3.17089	3.93444	-3.06005	-4.48935	-2.89873	-1.88324	-15.5453	-20.5261	-11.2498	-4.16401	#VALUE!	-10.195
C-1	-5.76455	-8.7696	-4.82362	-1.45643	-3.31091	-1.94631	-2.84639	-6.83116	-1.67014	-5.8426	-1.16105	-6.97222	4.24971	-2.91442	-2.33363	-1.29189	-2.08185	-4.2106	-3.68863	-1.47546	-5.30221	-2.34509	6.07121	-3.95917	4.32168	-2.32265	-7.18408	-3.51967	4.53175	-4.3703	-1.18172	1.25713	-8.29295	-1.95331	4.81237	-2.5342	-4.42751	-2.00225	-0.647418	#VALUE!	#VALUE!	-13.5357	-3.05161	-6.82383	-10.7341
C-2	-5.74383	-8.98144	-4.58366	-1.65411	-3.34484	-2.05074	-3.40205	-6.92515	-1.65331	-5.58466	-2.3632	-7.52798	4.06682	-3.15067	-2.985	-1.50555	-1.77016	-4.19591	-3.79723	-1.58179	-5.38408	-2.6857	5.9784	-4.40988	3.87214	-1.68623	-8.45713	-4.0243	4.80883	-4.51378	-1.48348	1.54531	-9.24334	-1.99675	4.39999	-3.00624	-4.39163	-2.08921	-1.63572	#VALUE!	#VALUE!	-14.398	-3.35539	-9.64433	-9.92572
C-3	-5.48548	-17.6171	-4.25062	-1.6269	-3.47218	-2.05287	-3.22484	-7.13452	-1.72494	-5.73675	-1.89863	-8.00876	4.76851	-2.80951	-1.35968	-1.3257	-1.95611	-4.27043	-3.76214	-1.53267	-5.28782	-2.042	6.73307	-4.38192	4.7086	-2.05567	-6.38761	-3.56831	4.95478	-4.26442	-1.22381	1.23658	-8.66727	-1.67043	4.89481	-2.47464	-4.34576	-2.07319	-0.854565	-11.9813	-16.2791	#VALUE!	-2.48983	-6.94669	-9.29741
C-4	-5.44453	4.52168	-4.09039	-1.40856	-3.26324	-1.93963	-2.94853	-6.82276	-1.5625	-5.258	-2.41922	-7.6382	4.03549	-3.03922	-2.73881	-1.16874	-1.58054	-3.92491	-3.54451	-1.35609	-5.16503	-2.39714	6.16464	-4.438	3.98624	-1.58146	-6.94383	-3.52289	4.45637	-4.14392	-1.39135	1.81345	-8.87905	-2.21116	4.42385	-3.2691	-3.71437	-2.08027	-1.63153	#VALUE!	#VALUE!	-13.3348	-3.0326	#VALUE!	-8.41717
C-5	-4.95629	5.08846	-4.30384	-1.20601	-3.31694	-1.78312	-3.00894	-6.50523	-1.39691	-5.0538	-1.33451	-6.90339	4.93216	-3.06771	-1.90063	-1.05279	-1.51053	-3.91641	-3.49131	-1.08231	-4.78792	-1.96373	6.84481	-3.72362	4.65853	-1.1473	-6.48857	-3.77873	5.12265	-4.15297	-0.795249	1.94351	-8.65173	-1.75406	5.37862	-3.38551	-3.46807	-1.9064	-0.660118	-13.3026	#VALUE!	-11.4015	-2.46252	-9.71074	-7.1851
C-6	-5.72249	-6.54063	-4.37801	-1.70231	-3.49683	-2.14615	-2.80058	-6.6158	-2.1342	-5.58857	-1.32122	-7.66219	4.4637	-2.74219	-1.74923	-1.62545	-2.08305	-4.37945	-3.98813	-1.4457	-5.33185	-1.88906	6.37632	-4.489	4.73077	-2.22913	-7.29313	-3.66995	4.55337	-4.28871	-1.14451	1.2469	-8.74462	-1.58147	5.09079	-3.23153	-4.07749	-2.05766	0.330513	-14.7691	-17.7454	-14.9514	-2.76541	-7.66934	-6.8647
C-7	-5.33571	4.95636	-5.34112	-1.67768	-3.75394	-2.47731	-4.03775	-7.69616	-2.16701	-5.77569	-1.38062	-7.97956	1.92272	-3.41496	-1.85561	-1.51459	-2.14733	-4.63665	-4.23811	-1.62952	-5.88322	-2.09555	7.09822	-4.19211	4.75479	-2.27829	-8.02114	-4.63731	5.04587	-4.86848	-0.877104	1.08032	-9.13624	-1.76835	5.24398	-3.20274	-4.61081	-1.83724	-0.017681	#VALUE!	#VALUE!	#VALUE!	-4.70996	-8.30749	-7.33644
C-8	-5.42053	5.07455	-4.39905	-1.14493	-3.37057	-1.91166	-3.13106	-7.2505	-1.38969	-5.23046	-1.66088	-7.54347	0.94744	-3.09392	-1.77373	-1.06854	-1.63572	-3.91604	-3.35676	-1.09314	-5.16956	-1.70491	6.63242	-4.05743	5.0599	-1.46796	-7.70229	-3.46037	5.28073	-4.06524	-0.744401	1.90905	-8.80546	-1.73767	5.17388	-3.24235	-3.98063	-1.58317	-0.247373	#VALUE!	#VALUE!	-10.9645	-2.38872	-10.6397	-7.48053
C-9	-4.71579	4.52784	-4.55147	-1.38057	-3.02256	-2.19714	-3.30198	-6.73341	-1.37983	-5.1645	-2.21247	-7.7852	-3.27849	-3.09591	-3.65741	-1.21725	-1.51394	-4.08063	-3.78273	-1.04831	-5.1376	-2.32102	6.51243	-4.2127	4.46244	-1.5253	-8.6824	-3.26985	5.04783	-4.02725	-1.04478	1.89892	-8.99033	-1.97781	4.96494	-3.58225	-3.85382	-1.94803	-1.27262	-13.1793	#VALUE!	-11.4011	-3.8977	-14.1643	-9.28605
D-1	-5.30707	4.45005	-4.54989	-1.2231	-3.71946	-1.64277	-3.16088	-8.29581	-1.62987	-5.73183	-1.08006	-6.72544	4.33987	-2.72036	-2.05292	-1.20225	-1.5886	-4.72869	-3.26866	-1.01016	-5.08491	-1.78284	6.82566	-3.23834	4.8354	-2.51766	-6.52157	-3.69884	4.73492	-4.05837	-0.999466	1.7214	-8.13078	-2.14815	4.51422	-2.52035	-3.60539	-1.25859	-0.418282	#VALUE!	#VALUE!	-13.1043	-2.51331	-5.53617	-9.91422
D-2	-6.42134	-20.6309	-5.86581	-1.31438	-3.89436	-2.10774	-4.12872	-8.58889	-1.89574	-5.84453	-1.08196	-7.50943	4.84711	-3.32353	-1.46855	-1.37462	-1.98438	-5.21626	-4.12643	-1.18854	-5.69028	-1.46871	6.79104	-2.80936	5.12361	-2.84389	-7.24722	-4.23931	5.25709	-4.94537	-0.956754	1.28896	-9.13045	-2.19488	4.23165	-2.81635	-3.83361	-1.72184	-0.357917	-15.0978	#VALUE!	-10.1531	-2.2571	-8.96094	-8.75284
D-3	-5.54723	4.03587	-5.19755	-1.4738	-3.55942	-2.17071	-3.71229	-8.76308	-1.60108	-5.96671	-1.76121	-7.86134	4.27448	-3.1439	-1.69742	-1.23083	-1.76794	-4.85421	-4.17008	-1.21803	-5.18155	-1.88264	6.47424	-3.44707	4.68769	-3.03223	-7.54755	-2.92637	4.86754	-4.13901	-1.33667	1.28316	-8.93056	-1.88341	4.5291	-2.74121	-4.20723	-1.89236	-0.97612	-16.4732	#VALUE!	-12.0406	-2.43855	-8.42012	-8.64999
D-4	-5.5881	3.46501	-5.22045	-2.08727	-4.24683	-2.36443	-4.44718	-8.67925	-2.36915	-6.51669	-2.63119	-8.19133	3.58835	-3.44691	-9.8835	-1.83493	-2.32428	-5.45823	-4.29796	-1.95628	-5.94456	-2.40868	5.51586	-4.11246	3.69588	-3.08516	-7.63789	-4.37113	3.80543	-4.9955	-2.02743	0.791041	-9.13726	-2.65447	4.27611	-2.64741	-4.92581	-2.32588	-1.29723	#VALUE!	#VALUE!	-12.7204	-2.67424	-9.04324	-8.3749
D-5	-6.2925	4.80498	-5.53037	-1.57827	-3.98575	-2.38056	-4.04069	-7.76528	-2.07866	-6.02083	-2.26524	-7.82987	4.36366	-3.23385	-1.66487	-1.3016	-1.95453	-5.66749	-4.0148	-1.41066	-5.43375	-1.94574	6.24227	-3.61951	4.54425	-2.55634	-7.70409	-5.26419	4.62377	-4.67167	-1.37113	1.18618	-8.85334	-2.10025	4.42073	-2.91762	-4.61149	-2.17923	-0.694867	-14.9205	#VALUE!	#VALUE!	-4.24136	-9.7358	-8.56782
D-6	-5.92352	-19.1842	-4.98002	-1.70217	-4.58979	-2.55399	-4.10827	-7.68326	-2.20501	-5.97715	-2.38973	-7.51304	-0.317543	-3.36437	-10.226	-1.58721	-1.98659	-5.57556	-3.81205	-1.43522	-5.76938	-2.11136	6.26945	-3.75397	4.09061	-2.42075	-7.62348	-5.71468	4.20344	-4.47559	-1.57445	1.42193	-8.71916	-2.77531	4.25009	-3.22025	-4.47429	-2.45123	-0.551114	#VALUE!	-20.653	-11.4719	-3.8825	-11.1235	-8.13142
D-7	-6.32573	4.27518	-6.64752	-2.05679	-4.57749	-2.50473	-4.64614	-8.68166	-2.4246	-6.4704	-2.70604	-8.03337	-1.13023	-3.39737	-6.30595	-1.62155	-2.32479	-6.64275	-4.32801	-1.6314	-5.89834	-2.26982	6.42226	-3.70686	4.42536	-3.34267	-8.03378	-4.43975	4.65266	-5.56659	-1.84249	0.945861	-9.55494	-3.27174	4.22771	-3.03849	-5.50364	-2.0331	-1.29085	-14.5264	#VALUE!	#VALUE!	-4.60993	-8.01032	-8.95773
D-8	-5.97319	-8.78215	-5.86358	-1.99174	-4.2538	-2.55375	-4.15254	-8.30767	-2.00996	-6.1227	-4.44366	-8.43084	-2.74618	-3.35699	-15.8156	-1.77943	-1.9787	-5.36515	-4.30703	-1.52715	-5.71334	-2.30492	5.55882	-4.37735	3.71511	-2.45893	-8.98162	-4.88663	7.16455	-4.87156	-2.01036	1.27684	-8.9925	-3.27025	4.10973	-3.23661	-5.77014	-2.23045	-1.93358	-12.6202	#VALUE!	-13.8464	-4.90378	-9.41342	-8.44367
D-9	-5.49536	4.50775	-5.36911	-1.52627	-3.95749	-2.02595	-3.52631	-7.96714	-1.49568	-5.4658	-2.90794	-7.70196	-4.9675	-2.97967	-16.0974	-1.13682	-1.28526	-4.73959	-3.85232	-1.14118	-4.74255	-2.10294	6.43174	-3.57	4.15728	-2.14206	-9.20298	-4.51502	5.31375	-4.07801	-1.63524	1.94679	-8.98813	-3.01422	6.67012	-3.19908	-4.99022	-2.02704	-1.7267	#VALUE!	#VALUE!	-11.2577	-3.68711	-9.24069	-7.98729
E-1	-5.38847	-17.0677	-5.35968	-1.38979	-3.96259	-1.80715	-4.19654	-7.71987	-1.74319	-6.0604	-1.92498	-7.09715	4.28538	-3.14767	-2.0687	-1.24814	-1.95241	-4.88644	-3.69551	-1.34061	-5.36774	-2.03644	5.8742	-3.53742	4.34538	-2.59772	-6.45029	-3.25328	4.70966	-4.78651	-1.31039	1.54529	-8.92608	-2.27776	4.78127	-2.64319	-4.3238	-1.57909	-0.925296	-15.976	#VALUE!	-12.3436	-2.14242	#VALUE!	-8.91271
E-2	-6.14154	4.64778	-6.55433	-1.23559	-4.14715	-2.12435	-4.50089	-7.2466	-2.14395	-6.34383	-1.71238	-7.83547	4.5932	-3.57149	-1.39588	-1.15895	-2.29286	-5.79843	-4.12951	-1.23776	-5.53209	-1.43681	6.64276	-2.53858	4.68542	-2.88726	-6.80738	-4.54403	5.33622	-4.84747	-1.0127	1.40991	-9.47437	-2.04194	2.61487	-2.81901	-4.46718	-1.90821	0.0601326	-13.0828	#VALUE!	-13.1924	-3.81282	-8.05429	-10.0982
E-3	-5.14388	-9.52972	-5.45962	-1.92789	-3.85112	-2.28696	-4.53614	-8.55476	-2.66363	-6.66519	-2.71485	-7.40382	2.95571	-3.2341	-3.50872	-2.1157	-2.7116	-5.00458	-4.09334	-2.00929	-5.81752	-3.22397	5.06091	-4.36692	2.7633	-2.8935	-6.42388	-3.59957	3.40374	-4.91477	-2.15699	0.942382	-9.00622	-2.93474	3.08168	-2.57701	-4.57162	-2.18362	-1.44756	-17.6366	#VALUE!	-14.1425	-3.68276	-10.3031	-8.96231
E-4	-5.02774	3.95718	-4.88343	-1.55016	-4.04078	-2.03184	-4.44218	-8.99235	-2.07816	-6.48376	-2.12179	-7.59021	-1.71903	-3.27262	-1.09342	-1.54183	-2.00529	-4.72189	-3.75093	-1.65002	-5.5324	-2.15897	5.96859	-4.24232	3.99974	-2.24685	-6.58843	-3.35909	4.15766	-4.61528	-1.72463	1.48096	-8.77218	-2.4676	4.26619	-2.85534	-4.18316	-1.85631	-1.44884	#VALUE!	-15.9566	-16.582	-3.70782	-10.1611	-7.7608
E-5	-5.59617	4.14688	-6.40401	-1.89612	-4.66547	-2.54378	-4.70999	-9.01207	-2.60619	-6.66135	-1.52834	-8.36154	3.98135	-3.72009	-1.84173	-1.80921	-2.58939	-5.94309	-4.3363	-1.75758	-6.13103	-2.48888	6.2641	-3.92772	4.29868	-2.77864	-7.26876	-4.53024	4.25591	-5.27712	-1.82106	1.14017	-8.87527	-2.1722	4.14128	-2.96633	-4.85469	-1.74847	-0.811218	-15.8202	#VALUE!	#VALUE!	-5.77951	-9.42882	-8.58967
E-6	-5.21642	5.06955	-5.27083	-1.08973	-4.29272	-1.78413	-3.62598	-8.15749	-2.11069	-5.90874	-0.307773	-6.96955	-0.545178	-3.02184	-1.93707	-1.17603	-1.99335	-5.27207	-3.75165	-1.05916	-5.33733	-1.78886	7.19119	-3.73042	5.45464	-2.67185	-5.95888	-4.20651	4.99611	-4.57596	-0.830386	1.94807	-8.38324	-2.78673	4.67823	-3.42591	-4.04246	-1.25954	0.478231	#VALUE!	#VALUE!	#VALUE!	-4.97008	-7.07943	-7.84442
E-7	-5.86595	4.6576	-7.17931	-1.70432	-5.76837	-2.29175	-4.48502	-8.72616	-2.36843	-6.68086	-3.21552	-8.03323	2.309	-3.38005	-2.75387	-1.50776	-2.48337	-6.64224	-4.84666	-1.77257	-5.67495	-1.74108	6.92347	-3.71853	5.12031	-3.92821	-7.33638	-5.56619	5.28578	-5.28694	-1.97479	1.19787	-9.0278	-3.96295	4.79873	-3.02911	-5.88877	-2.22446	-0.678122	#VALUE!	#VALUE!	#VALUE!	-6.40882	-8.71089	-7.50809
E-8	-5.53595	4.22936	-5.86789	-1.44555	-4.15484	-1.95886	-4.31238	-9.1381	-2.38711	-6.51483	-2.25449	-8.05245	4.06967	-3.35204	-1.9779	-1.51425	-2.45116	-5.72495	-4.01854	-1.6359	-5.54375	-1.92502	5.67219	-4.47754	4.21317	-2.95262	-7.06732	-2.9167	4.295	-4.8223	-1.8716	0.959649	-9.00479	-2.62489	2.518	-2.89891	-4.71816	-2.00384	-0.45999	-14.2689	#VALUE!	-14.2788	-3.60107	-9.04273	-8.45264
E-9	-5.2371	4.49052	-5.89077	-1.11472	-4.61144	-1.99787	-4.18394	-9.13432	-1.90258	-6.27435	-1.43941	-7.41852	1.15751	-3.49117	-5.46508	-1.37766	-2.0577	-5.31562	-3.88253	-1.13333	-5.34092	-1.98945	7.26668	-3.85928	4.80913	-2.87814	-6.32206	-4.19143	5.08815	-4.3706	-0.942761	1.72537	-8.60435	-2.72007	5.09434	-3.40241	-4.74737	-1.69901	0.260496	-11.9525	#VALUE!	-10.9237	-4.45219	-8.34397	-7.54498
F-1	-5.2341	-16.5669	-4.49482	-1.86258	-3.59209	-2.16633	-3.45967	-7.1894	-1.99362	-5.5652	-1.10139	-7.84249	5.24209	-3.1077	-1.70559	-1.609	-1.68371	-4.40274	-3.86588	-1.67332	-5.59983	-1.85822	6.96516	-4.77839	4.94292	-2.54969	-8.55431	-3.78685	5.50812	-4.36088	-1.28624	0.918442	-8.83793	-1.82771	5.24596	-2.32501	-5.42418	-2.25172	-0.148761	#VALUE!	#VALUE!	-12.0398	-3.44198	-7.78051	-8.30827
F-2	-5.13113	-7.08853	-4.81456	-1.40076	-3.84302	-1.82731	-4.497	-9.23729	-2.23309	-6.01817	-0.58004	-8.38837	5.64281	-3.39166	-6.53269	-1.31314	-1.74444	-4.28997	-3.31087	-1.85058	-5.30757	-1.15784	7.03759	-2.98947	5.47701	-1.78399	-6.58825	-3.6403	5.87528	-4.59299	-0.406443	0.985699	-8.88486	-1.49783	5.75794	-2.53899	-4.30351	-2.45575	0.398872	#VALUE!	#VALUE!	#VALUE!	-2.16997	-10.2005	-7.83803
F-3	-4.82195	4.96286	-5.71924	-1.93551	-3.73587	-2.08403	-4.35388	-8.55416	-2.56946	-6.47588	-1.76906	-8.01649	5.14428	-3.34629	-1.94051	-1.89592	-2.17503	-4.65339	-4.08296	-2.26326	-5.93349	-2.41351	6.72012	-5.35095	5.00909	-2.62406	-7.04768	-3.7364	5.62968	-4.95435	-1.30948	0.48246	-8.52384	-1.59696	5.33507	-2.25434	-5.14369	-2.3581	-0.427875	#VALUE!	#VALUE!	#VALUE!	-3.15884	#VALUE!	-8.26712
F-4	-4.54811	4.77006	-4.07358	-0.962606	-3.07407	-1.39886	-2.99655	-7.44022	-1.29915	-5.30456	-1.1707	-6.24432	5.05841	-2.69945	-1.85035	-0.875001	-1.11731	-3.69084	-2.83619	-1.10248	-4.78217	-1.78899	6.59991	-4.01957	4.991	-1.30823	-6.92774	-3.02706	5.51301	-3.65416	-0.579396	1.39976	-8.2134	-1.63374	4.93036	-2.85556	-4.36096	-1.6178	-0.255858	-16.3008	#VALUE!	#VALUE!	-2.13492	#VALUE!	-7.60663
F-5	-4.96292	4.39633	-4.77151	-1.77191	-3.11248	-1.88839	-3.5398	-7.65576	-2.25376	-5.97918	-1.61037	-7.44686	4.61136	-3.18565	-2.71323	-1.69869	-1.87765	-4.24622	-3.22623	-1.9859	-5.37988	-2.47804	5.97548	-4.16054	4.39627	-1.87355	-6.49778	-3.11309	5.31373	-4.63893	-1.26231	1.34622	-8.46515	-1.53681	5.01655	-2.32915	-4.86994	-1.94566	-0.195043	-12.3142	#VALUE!	-12.6561	-3.25985	-7.34371	-8.6129
F-6	-5.55915	-10.4707	-4.87843	-1.81777	-3.73568	-2.28896	-3.77697	-7.29094	-2.10798	-5.55381	-2.22022	-7.62108	4.30926	-3.61204	-2.44948	-1.73627	-1.79028	-4.62176	-3.27218	-1.78007	-5.53131	-2.61593	6.20022	-3.92746	3.99628	-1.90917	-8.55287	-4.49663	4.87983	-4.66305	-1.63671	1.66631	-9.11115	-2.90418	4.59161	-2.47063	-5.17208	-2.13668	-1.3595	-14.3188	-19.3182	-11.9047	-2.72195	-9.85724	-7.91162
F-7	-6.34134	3.78517	-6.81663	-2.70239	-4.28899	-2.97395	-5.08847	-9.17791	-3.33516	-6.94289	-2.05058	-9.20407	-1.64487	-3.71832	-18.4669	-2.59771	-2.79256	-5.66873	-4.42359	-2.99463	-6.80021	-2.89475	5.77707	-4.85593	3.94624	-3.28347	-9.01698	-5.52762	4.41528	-5.83712	-2.06197	0.132586	-9.76798	-2.5354	3.45762	-2.12348	-5.98247	-2.39597	-1.65865	-17.6107	#VALUE!	-13.5031	-4.20592	-11.3454	-8.04228
F-8	-5.57613	4.31613	-6.00655	-2.26367	-3.84852	-2.55612	-4.63766	-7.92803	-2.64573	-6.29328	-2.22338	-8.74651	4.23698	-3.62821	-8.1619	-2.16014	-2.29494	-5.16144	-4.25105	-2.35894	-6.08269	-2.48898	6.57072	-5.36718	4.03774	-2.7761	-8.70059	-4.24379	4.58256	-5.03743	-1.71408	0.689641	-9.08016	-2.15543	4.44792	-2.37104	-5.03342	-2.38037	-1.3911	-16.3851	#VALUE!	-13.8213	-3.4557	-10.2413	-8.87005
F-9	-5.41977	4.15489	-5.15856	-1.99734	-3.64397	-2.38555	-4.39219	-8.38819	-2.71294	-6.21102	-1.79018	-7.87016	4.23132	-3.31795	-2.1409	-2.01507	-2.12012	-4.89914	-3.3247	-2.14072	-5.79197	-2.64049	6.15337	-4.73873	4.25483	-2.51673	-7.7189	-4.72135	4.35321	-4.81715	-1.35251	1.17554	-8.76991	-2.33765	4.43774	-2.32854	-4.78981	-2.26699	-0.505692	-14.0695	-16.9854	-12.9288	-2.89191	-11.2258	-8.43421
G-1	-5.80173	3.85241	-5.06414	-1.89071	-3.31314	-1.99839	-3.45888	-7.81513	-2.28507	-5.95819	-1.85788	-7.38856	3.69114	-2.91999	-2.45901	-1.90483	-2.09442	-4.57154	-3.4555	-1.84737	-5.32773	-2.64201	6.02448	-5.37053	3.8354	-2.59695	-7.79065	-3.32019	3.73076	-4.61237	-1.46326	1.08701	-8.33858	-2.29441	4.09217	-2.82836	-4.36602	-2.27404	-0.645751	-15.8363	#VALUE!	#VALUE!	-3.56285	-10.6575	-9.79117
G-2	-6.55293	-7.31805	-6.28888	-2.4596	-3.65506	-2.34057	-4.93789	-8.4969	-3.43757	-6.71685	-2.46988	-8.20211	3.78487	-3.48969	-2.92323	-2.46651	-2.83967	-5.49055	-4.39836	-2.88804	-6.62067	-3.10181	5.8523	-4.91146	3.80901	-3.45675	-7.51821	-4.27564	3.82248	-5.6511	-1.96885	-0.0740952	-9.19494	-2.27179	4.25433	-2.31688	-5.10766	-2.4724	-1.03083	#VALUE!	-19.1291	-17.1891	-4.01637	-9.97238	-8.87623
G-3	-5.60922	4.19715	-5.54983	-2.16535	-3.22009	-2.24636	-3.983	-7.43716	-2.57875	-6.2964	-1.65202	-8.19187	4.56607	-3.23266	-2.62057	-2.03531	-2.13564	-4.65666	-3.85502	-2.18182	-5.8814	-2.77639	6.02041	-5.52264	3.95539	-2.9018	-7.0201	-3.77547	4.25193	-4.84318	-1.85133	0.49504	-8.98227	-1.93268	4.19457	-2.73793	-4.64415	-2.10906	-1.16107	#VALUE!	#VALUE!	-12.2342	-3.77732	-10.5381	-7.9395
G-4	-5.60136	-7.07186	-5.36401	-2.23942	-3.54268	-2.26113	-4.41786	-8.09183	-2.77582	-6.13245	-1.95501	-8.01962	3.8335	-3.29657	-8.66351	-2.16532	-2.26257	-5.04827	-3.69442	-2.28127	-5.94497	-2.7482	6.14409	-4.85018	3.84348	-2.84821	-7.34489	-4.18222	4.00654	-5.01805	-1.74454	0.650533	-8.74985	-2.38137	3.72064	-2.29212	-5.09421	-2.41253	-1.35516	#VALUE!	#VALUE!	-13.377	-3.32453	-10.2945	-8.17537
G-5	-5.63203	4.712	-5.61989	-1.83476	-3.23191	-1.66322	-3.84208	-7.63907	-2.26517	-6.34993	-2.09687	-8.27055	4.70327	-3.13627	-2.19845	-1.71242	-2.09215	-4.2333	-3.62741	-1.91378	-5.25561	-2.43582	6.42753	-4.68397	4.16786	-2.4382	-7.04351	-4.03871	4.64797	-4.39992	-1.22143	0.985635	-8.34558	-1.90459	4.58348	-2.4365	-4.78806	-2.14363	-1.01827	#VALUE!	-16.6058	-12.8024	-3.33212	#VALUE!	-6.99903
G-6	-5.42829	-9.01627	-4.83453	-1.51321	-3.25757	-1.84024	-3.30484	-6.83639	-1.69189	-5.08303	-2.49928	-6.9842	4.78127	-2.97176	-7.60661	-1.39104	-1.33587	-4.20962	-3.0756	-1.16565	-4.89157	-2.06504	7.01166	-4.00809	4.21609	-1.64259	-9.42394	-4.29006	4.9785	-4.2567	-1.60674	1.62673	-8.74496	-2.33027	5.05955	-2.86463	-4.52481	-2.09595	-1.16694	-15.4927	#VALUE!	-15.97	-3.12573	-13.3375	-6.58323
G-7	-6.90404	-7.55124	-8.06654	-2.99689	-4.48196	-3.04533	-5.54671	-9.21817	-3.79129	-7.60278	-2.58143	-10.4122	3.99373	-3.55446	-2.88825	-2.87773	-3.1694	-6.45441	-4.70329	-3.13218	-6.88353	-3.09221	6.06061	-4.73486	3.5808	-3.89446	-8.86404	-6.29478	4.22297	-6.11108	-2.08378	-0.635901	-9.61017	-2.58299	3.67908	-2.5692	-6.29678	-2.27987	-1.7092	#VALUE!	#VALUE!	-16.231	-5.48297	-10.2294	-7.74193
G-8	-5.15762	-5.96872	-5.72713	-2.25978	-3.67346	-2.33988	-4.43744	-8.25056	-2.96965	-6.60693	-1.30702	-8.43375	4.26193	-3.1622	-1.69125	-2.30455	-2.40982	-4.93763	-3.60392	-2.28947	-6.18469	-2.36504	6.37915	-5.60514	4.67218	-3.10438	-7.4273	-4.8376	4.23892	-4.96329	-0.987064	0.261192	-8.20491	-1.61638	4.64765	-2.66282	-4.38058	-2.03178	-0.377323	#VALUE!	#VALUE!	-14.3572	-3.88543	-10.0577	-7.35276
G-9	-5.76287	-8.68615	-5.67355	-2.22361	-3.52448	-2.28432	-4.3107	-8.95648	-2.85405	-6.25299	-2.05064	-8.22436	3.7594	-3.41724	-2.35595	-2.24849	-2.47489	-4.97585	-3.64634	-2.21715	-5.89992	-3.00445	6.00595	-6.02515	4.00842	-3.00767	-7.21202	-4.62144	4.02045	-5.15606	-1.60464	0.373554	-8.75959	-1.94662	3.94677	-2.60595	-4.80077	-2.17467	-1.2337	#VALUE!	#VALUE!	-13.3681	-3.45666	#VALUE!	-9.50523
H-1	-5.38805	4.44695	-4.89662	-1.36837	-3.37455	-1.71531	-2.86322	-7.25785	-1.65061	-5.10099	-2.62749	-6.57618	4.94114	-2.64422	-3.39248	-1.22853	-1.61662	-4.13539	-3.15561	-0.896617	-4.82616	-2.28934	6.5907	-4.09493	4.41962	-1.75885	-8.68469	-3.70151	5.03186	-4.29436	-1.17348	1.72676	-8.19494	-2.08987	5.28062	-2.30155	-5.10675	-1.22601	-0.904992	#VALUE!	#VALUE!	#VALUE!	-4.13551	-8.51428	-7.5304
H-2	-4.62142	4.66458	-3.79383	-1.23832	-2.82889	-1.6376	-2.85382	-6.86564	-1.37526	-5.08857	-1.80902	-6.32443	4.90334	-2.69487	-2.88325	-1.17408	-1.23659	-3.73623	-2.48159	-0.981417	-4.44439	-2.03053	6.71602	-4.22245	4.73559	-1.08728	-8.27265	-3.11133	5.10499	-3.92799	-1.15343	2.00491	-8.329	-1.9385	5.54234	-2.6854	-4.85846	-1.72881	-0.710988	#VALUE!	#VALUE!	-13.1035	-3.24261	#VALUE!	-7.59647
H-3	-5.00915	3.90954	-4.82466	-1.82264	-3.19754	-2.05443	-3.45544	-7.925	-2.14894	-5.79051	-2.62354	-6.93108	4.11701	-3.23171	-3.19832	-1.6981	-1.85921	-3.99558	-3.02655	-1.68896	-5.14117	-2.69522	5.58326	-5.09431	3.58044	-1.88043	-7.43928	-3.21897	4.4571	-4.85282	-1.66699	1.3268	-8.55362	-2.6099	4.62647	-2.26724	-4.79214	-2.18146	-1.47982	#VALUE!	-17.8653	-12.1582	-3.89357	-7.79177	-7.89607
H-4	-5.27123	4.32822	-4.69122	-1.52007	-3.89787	-1.97584	-4.0085	-7.1822	-2.17432	-5.69974	-1.5063	-7.12502	4.6012	-3.26424	-2.9262	-1.49921	-2.06941	-4.10532	-3.42744	-1.5499	-5.419	-1.81256	5.96999	-3.94865	4.48754	-1.61706	-7.04817	-3.84387	4.74967	-4.9735	-0.924772	1.35939	-8.69216	-2.44225	4.76503	-2.6976	-4.56123	-2.07072	-0.335396	#VALUE!	#VALUE!	-15.5009	-3.41966	-12.6009	-8.63384
H-5	-5.20778	3.96374	-5.22932	-1.96936	-3.84472	-2.41468	-3.58531	-7.7655	-2.31024	-6.28391	-3.02556	-7.17285	3.94159	-3.22379	-3.46973	-1.93258	-2.12811	-4.58659	-3.34178	-1.90848	-5.30985	-2.79331	5.73333	-5.17795	3.73554	-2.02463	-8.44483	-4.82474	4.30207	-5.01261	-1.90761	1.00492	-8.26921	-2.75841	4.30269	-2.25143	-5.37093	-2.11341	-1.53289	-20.6432	#VALUE!	-13.0692	-3.16091	-9.56013	-8.71164
H-6	-5.13904	3.78845	-5.53549	-2.01873	-4.08031	-2.36623	-3.95504	-8.34171	-2.51803	-6.48941	-2.16014	-7.57927	3.74811	-3.23818	-3.87106	-1.97679	-2.38627	-4.74827	-3.70186	-1.83246	-5.66687	-2.65204	5.92567	-4.65113	3.74127	-2.33457	-8.27615	-4.38018	4.20352	-5.16839	-1.74958	0.894781	-8.40762	-2.56766	3.37263	-2.43757	-5.32677	-1.99758	-1.33243	-13.9472	#VALUE!	-15.1664	-3.61359	-11.6787	-8.3091
H-7	-6.01971	-8.22741	-6.56741	-2.66509	-4.65731	-2.98771	-4.76455	-8.85291	-3.33464	-7.15831	-2.97473	-8.88113	-7.54539	-3.56685	-5.92325	-2.50386	-2.95218	-5.72119	-4.48258	-2.46483	-6.7318	-3.09683	6.04037	-6.30406	3.82024	-3.23162	-8.7892	-6.17637	4.04662	-5.83669	-1.96863	-0.0875947	-9.63907	-3.25505	3.65857	-2.15437	-6.25271	-2.16936	-1.33918	-18.0347	#VALUE!	-18.2768	-6.06911	#VALUE!	-8.88597
H-8	-5.20778	4.14375	-5.94466	-2.17417	-4.03598	-2.7917	-4.31202	-8.33564	-3.02492	-6.56364	-1.6991	-7.85019	4.20185	-3.54348	-3.67975	-2.14178	-2.66654	-5.12655	-3.66813	-1.91196	-6.28954	-2.74301	6.46071	-5.0958	4.18325	-2.80118	-8.22704	-4.89144	4.273	-5.36608	-1.32914	0.499952	-8.89382	-2.71491	4.36346	-2.37674	-4.82106	-1.78646	-0.0358513	-16.8318	#VALUE!	-12.3411	-4.94485	-9.57913	-9.34791
H-9	-4.91404	4.28141	-5.69114	-1.97701	-4.00022	-2.57548	-3.67403	-8.41293	-2.47531	-6.56127	-1.2969	-8.12876	4.45676	-3.43569	-4.05425	-1.8287	-2.26961	-4.52126	-4.13119	-1.59315	-5.97631	-2.50149	6.30561	-5.09098	4.57472	-2.63924	-7.71806	-5.05292	4.3352	-5.15675	-1.03792	0.773886	-8.3071	-2.59533	4.80413	-2.53154	-4.87758	-1.53269	-0.418043	#VALUE!	#VALUE!	#VALUE!	-5.14234	#VALUE!	-8.54826
I-1	-7.11781	4.92941	-6.23463	-2.97534	-5.31932	-4.25827	-4.42095	-11.7153	-4.00992	-6.5909	0.255607	-8.79194	4.34009	-4.14191	-1.42852	-3.05363	-3.95193	-5.49341	-5.30879	-3.39411	-7.53703	-3.06123	5.98298	-3.53746	4.20074	-4.51479	-8.5592	-4.72163	4.98738	-6.39929	1.0261	0.155516	-9.08393	-2.37873	4.20111	-2.99549	-4.49558	-3.36408	1.19496	#VALUE!	3.66379	#VALUE!	-4.15584	-6.96134	-10.2158
I-2	-6.8076	-6.59953	-6.15056	-3.04836	-5.21169	-4.03302	-4.49228	-8.04846	-4.04169	-6.73837	-0.881348	-8.93618	4.49939	-4.40066	-3.68685	-3.19545	-3.68302	-5.34317	-4.9643	-3.05751	-7.0376	-3.15347	5.56978	-4.50612	4.38507	-3.98219	-9.33062	-4.91016	5.09454	-6.20818	0.309102	0.26102	-9.56343	-2.49975	4.26598	-3.45055	-4.15859	-3.7893	0.996395	-13.739	-0.33176	#VALUE!	-3.81895	-8.51806	-10.61
I-3	-5.82947	4.759	-6.33673	-2.73382	-5.14257	-3.52124	-4.53907	-7.64578	-3.75718	-6.68723	0.53405	-9.86708	4.20823	-4.46497	-3.43693	-2.89913	-3.85229	-4.73365	-5.22705	-2.91358	-6.74985	-2.48993	5.94528	-2.78788	4.15246	-4.13459	-7.76804	-4.41029	5.01703	-5.99346	1.43591	0.529113	-9.1315	-2.60664	4.35688	-3.76674	-3.59704	-3.03234	1.98353	#VALUE!	1.85184	-14.3589	-3.32006	-6.78245	-11.9915
I-4	-6.42451	5.29946	-6.43893	-2.97368	-4.88336	-3.66192	-4.53241	-9.02919	-4.03386	-7.2839	-0.561002	-8.47862	4.16311	-4.14474	-3.48441	-3.04654	-3.8021	-5.0534	-5.29702	-3.17896	-7.03936	-2.60392	6.08728	-4.61848	4.85322	-4.18984	-8.23376	-4.69685	5.51301	-6.22264	0.476469	0.0964633	-9.36039	-2.27153	4.04329	-3.42234	-4.01709	-3.58329	1.18769	#VALUE!	5.82879	-12.0346	-3.62991	-7.71819	-10.4258
I-5	-6.35112	5.39168	-5.37841	-2.12911	-4.01387	-2.78087	-3.97277	-7.91754	-3.14583	-6.49993	-0.136799	-8.43247	3.49168	-4.06555	-3.45191	-2.34381	-2.97437	-4.29038	-4.09534	-2.48686	-5.7565	-2.70654	5.45689	-4.05224	4.69957	-2.90256	-6.33656	-4.0624	3.68932	-5.019	1.18025	1.07144	-8.10372	-1.86377	3.57008	-4.04038	-2.84587	-2.84781	1.89769	#VALUE!	4.71468	-11.6051	-3.95419	-8.07701	-9.64857
I-6	-7.78639	6.17691	-7.19154	-3.12194	-5.40807	-4.45928	-5.03616	-9.48347	-4.59101	-7.14627	0.770951	-9.44994	4.16338	-4.71477	-2.8385	-3.63879	-4.482	-5.47662	-5.12037	-3.48446	-7.41948	-2.54901	6.05353	-3.68988	4.68152	-4.3345	-8.12807	-5.10656	4.68034	-6.66302	1.37326	-0.476554	-10.2435	-2.85633	4.23349	-3.83893	-4.40162	-4.1016	2.17414	#VALUE!	1.08366	#VALUE!	-4.1133	-6.99601	-9.46975
I-7	-8.27023	5.21842	-6.28692	-3.0616	-4.43465	-3.77599	-6.04678	-8.79419	-4.7491	-7.59381	2.21984	-9.01573	3.88556	-5.30739	-2.9342	-3.09903	-4.26407	-5.50104	-5.40373	-3.04706	-7.20716	-3.12337	5.49267	-3.49938	5.47159	-4.73001	-7.91555	-5.1879	4.56762	-6.48528	1.41006	-0.632911	-10.0007	-2.2037	3.07998	-3.82594	-3.34678	-3.25955	2.28156	#VALUE!	4.56357	#VALUE!	-1.93146	-5.95165	-9.07213
I-8	-7.0925	-7.31839	-7.25788	-3.89208	-5.64939	-4.3226	-6.06531	-9.75777	-5.06826	-7.49654	0.144217	-10.4444	4.41171	-4.94503	-3.74368	-3.55841	-4.43939	-6.05539	-6.04838	-3.95603	-8.12004	-3.32407	5.99972	-4.88858	5.06483	-5.31336	-7.72095	-6.07074	4.92229	-6.9804	0.568214	-0.938658	-10.2295	-2.63069	4.18496	-3.52226	-3.11137	-3.79407	2.52465	-11.5234	7.04414	#VALUE!	-4.2489	-8.69092	-10.7445
I-9	-6.45487	-8.49223	-6.01257	-3.40725	-4.77016	-3.98552	-4.67556	-8.42386	-3.82899	-6.72076	0.335565	-9.99179	5.29711	-4.2894	-3.99741	-3.39509	-3.67112	-5.60653	-5.54723	-3.09337	-6.92524	-3.08453	6.81355	-4.78473	4.67153	-4.0993	-9.45484	-5.89585	6.65697	-6.26362	0.558468	0.378166	-9.88212	-1.94641	4.95767	-3.9207	-4.4196	-4.00791	1.93151	#VALUE!	-6.81071	#VALUE!	-4.64686	-7.48594	-10.9413
J-1	-7.90638	3.87244	-6.76532	-3.7415	-5.36716	-4.43118	-5.4463	-11.1034	-5.01174	-8.17376	0.268374	-9.25655	3.02893	-5.14357	-4.07008	-3.93534	-4.26548	-5.58073	-5.81362	-3.57453	-7.52688	-3.77933	5.16656	-4.72675	2.91113	-4.77246	-8.79486	-5.3459	3.83789	-6.60655	-0.452345	-0.57828	-10.9872	-4.19201	2.38616	-3.68673	-4.59338	-4.35617	0.00119431	-17.131	4.63575	#VALUE!	-4.15842	-7.40249	-11.0691
J-2	-7.37508	6.40217	-6.84134	-3.52573	-4.95737	-4.23805	-4.98825	-9.30245	-4.79508	-7.59309	-0.540313	-9.76874	4.28047	-4.23655	-2.71456	-3.55972	-4.28082	-5.66487	-5.99255	-3.65721	-7.61731	-3.16568	5.32502	-4.79281	4.24967	-4.6772	-8.06832	-4.99685	4.82133	-6.57399	-0.487321	-0.671198	-10.8709	-2.49731	3.93244	-3.4316	-4.37719	-4.26421	0.385739	#VALUE!	5.57058	-13.4076	-3.29199	-7.00911	-9.54046
J-3	-6.95743	5.48552	-5.9644	-3.46051	-4.49677	-3.99305	-4.93011	-9.39682	-4.14873	-7.44562	0.516021	-8.99015	4.07543	-4.89421	-2.83323	-3.13766	-3.53899	-5.44076	-5.12946	-3.52868	-6.79108	-3.31177	5.5587	-4.40713	4.14771	-4.06625	-8.11203	-5.58792	5.45847	-5.96405	-0.374379	-0.0900308	-10.5993	-2.98917	3.5183	-3.12923	-4.19778	-4.28405	0.355257	-15.5337	5.07675	#VALUE!	-3.43795	-7.54507	-9.92284
J-4	-6.97057	-7.02782	-7.04101	-3.35305	-4.55922	-3.72689	-5.17664	-9.61573	-4.32095	-7.68965	-0.943978	-9.84528	3.84812	-4.72495	-2.89309	-3.36506	-4.09854	-5.71646	-5.67361	-3.36172	-7.16612	-2.87043	5.77669	-4.53468	3.71552	-4.77046	-8.1136	-5.1468	4.69332	-6.01025	-0.125123	-0.318086	-10.4495	-2.90664	3.22228	-3.2948	-4.89409	-4.48757	0.421203	#VALUE!	4.14248	-12.1922	-3.87468	-7.24067	-9.29833
J-5	-7.69793	5.7548	-7.30153	-3.60524	-4.58304	-3.78716	-5.10593	-9.93602	-4.66558	-8.37221	-0.934071	-10.315	4.43951	-4.86666	-3.12004	-3.66089	-4.30213	-5.85373	-5.62175	-3.71288	-7.19731	-3.40005	5.59141	-4.56904	3.43212	-4.97221	-7.77956	-5.83949	5.17891	-6.07823	-0.709727	-0.581448	-10.3322	-3.33249	3.42139	-3.21442	-5.07541	-4.64126	0.208469	#VALUE!	4.91734	-12.1172	-3.67235	-8.97317	-9.31826
J-6	-6.06506	-4.51169	-6.00585	-3.06319	-4.73426	-3.92229	-5.02082	-9.517	-4.62016	-8.56638	2.52941	-10.151	4.38579	-4.21709	-1.81086	-3.18047	-4.01296	-4.79858	-5.21841	-3.74642	-7.22975	-1.72984	6.31378	-3.51847	5.74554	-4.65929	-7.14785	-4.58203	5.73844	-5.49556	1.62653	-0.404614	-9.90763	-1.77283	3.81827	-3.20671	-3.38518	-3.91127	1.60341	#VALUE!	5.26696	#VALUE!	-2.95423	-6.32692	-10.2626
J-7	-7.37598	4.99371	-6.05006	-2.46688	-4.17352	-3.58374	-4.82548	-8.91994	-4.07675	-7.02931	1.5281	-8.86893	3.10692	-4.73768	-1.96715	-2.82643	-3.64259	-5.30552	-4.74031	-2.95631	-6.57889	-3.00801	5.67155	-3.41209	4.93256	-3.52731	-6.56182	-5.0029	4.48622	-5.6558	1.0431	0.212943	-10.4273	-3.16121	3.38692	-3.45482	-3.28508	-3.34763	1.5354	#VALUE!	4.37405	-12.1219	-3.07993	-5.74584	-8.93825
J-8	-6.83409	4.55312	-7.05772	-3.44821	-5.23567	-4.56685	-5.12827	-9.87249	-5.16845	-8.25044	1.54968	-10.1075	3.61179	-4.77932	-2.93708	-3.93953	-4.48171	-6.04761	-5.92282	-3.95394	-7.76662	-3.44275	5.51436	-4.91174	4.19341	-5.16355	-7.48735	-6.02012	4.28267	-6.59494	0.0827149	-0.481907	-10.7559	-2.9466	3.70346	-3.64688	-4.11708	-4.06302	0.577289	#VALUE!	-0.303072	#VALUE!	-3.87474	-10.179	-8.69229
J-9	-7.52995	6.31834	-6.88454	-3.78868	-4.62768	-4.45383	-5.38025	-9.62651	-4.66418	-7.6389	0.551179	-9.50886	4.9785	-5.03505	-3.70482	-4.06476	-3.9509	-5.99631	-6.07451	-3.79445	-7.76719	-3.47933	5.93661	-5.00461	5.64364	-4.93822	-7.76214	-6.59686	5.22876	-6.42829	0.205623	-0.546748	-11.429	-1.80753	4.05882	-3.61907	-4.3938	-4.53208	0.831883	-14.5818	0.756894	#VALUE!	-4.28579	-10.2782	-10.1929
K-1	-9.3105	4.89755	-7.59739	-4.1547	-5.68308	-5.06167	-5.78761	-12.5986	-5.27746	-8.68187	-1.04892	-11.8265	4.32059	-5.51334	-3.76481	-4.36184	-4.20206	-6.85571	-6.26224	-3.98428	-7.95461	-4.14572	5.81488	-5.31208	1.93119	-5.09136	-12.7444	-7.83762	4.72787	-7.12967	-1.74958	-0.689272	-12.9022	-4.45208	1.03581	-3.57344	-6.67589	-4.95093	-0.895024	#VALUE!	-2.76619	#VALUE!	-4.01495	-10.3919	-12.6529
K-2	-8.30363	-7.68548	-6.94813	-3.23158	-4.57316	-4.22042	-6.49124	-10.598	-5.1705	-7.89837	-0.0429275	-10.7718	3.79797	-5.39886	-2.74761	-3.25779	-4.11249	-5.74898	-5.69692	-3.77475	-7.92488	-3.93394	5.52504	-4.58017	4.30086	-4.80551	-8.41808	-5.46885	5.3307	-7.10091	-0.281826	-0.633155	-12.2234	-3.59951	3.36568	-3.22193	-4.33771	-3.88319	0.80477	#VALUE!	5.31884	#VALUE!	-3.56489	-8.23887	-12.1875
K-3	-7.10751	5.81602	-6.00238	-2.48041	-4.38364	-3.40491	-4.69354	-7.95652	-3.39948	-6.80951	0.200209	-9.27752	4.87833	-4.50343	-2.32495	-2.50582	-2.86912	-4.64377	-4.59839	-2.55963	-6.97624	-1.93679	6.72547	-2.14587	4.75013	-3.1623	-8.24827	-4.32485	5.37776	-5.93897	0.746616	0.819262	-11.1637	-2.11258	4.22925	-3.73709	-3.45748	-3.16375	1.43273	-13.5335	6.20389	#VALUE!	-3.27411	-9.14938	-11.9699
K-4	-8.14304	-4.8312	-8.19649	-3.9302	-4.98034	-4.38707	-6.07512	-10.4818	-5.34442	-8.80091	-0.992755	-11.6097	4.27476	-5.34069	-2.73285	-4.00193	-4.44451	-6.15717	-6.6403	-4.07696	-8.11882	-3.69657	6.11525	-4.02889	3.13859	-5.39702	-9.8524	-6.16351	4.8336	-7.56513	-0.884456	-1.10106	-12.1722	-3.75465	3.43175	-3.6645	-5.46958	-4.63461	0.63989	#VALUE!	0.996679	#VALUE!	-3.67185	-8.71138	-14.1327
K-5	-9.14956	3.79424	-7.35653	-3.55928	-5.16277	-4.1388	-5.80503	-9.52889	-4.72879	-8.03859	-1.70163	-10.6334	4.17398	-5.21676	-14.6707	-3.71262	-3.9967	-6.5275	-6.14339	-3.71612	-7.67576	-3.65016	5.96994	-4.84636	3.20291	-5.12751	-9.9617	-7.08614	5.10702	-7.41072	-1.0226	-0.419574	-11.7844	-4.60283	3.13952	-3.5688	-5.9538	-4.89664	-0.234985	#VALUE!	-0.764428	#VALUE!	-3.50646	-8.84917	-10.83
K-6	-7.77058	5.97512	-8.78639	-4.01433	-5.59245	-4.8185	-6.02983	-10.1975	-6.53193	-8.94637	1.37662	-11.4225	4.85255	-4.2948	-1.7873	-3.91722	-5.23019	-6.52319	-6.62229	-4.71463	-8.25473	-1.57185	6.38098	-3.17232	5.70097	-6.82961	-8.17403	-4.09716	4.80233	-8.34784	1.08177	-2.2496	-12.2708	-1.70983	3.90307	-3.4389	-3.54948	-4.15734	1.50153	#VALUE!	5.45839	#VALUE!	-3.13765	-6.59367	-9.87318
K-7	-8.23588	3.85053	-7.54092	-3.3445	-5.3624	-4.61476	-6.28719	-11.0845	-5.36988	-7.81827	1.51373	-10.7586	4.36382	-4.92745	-1.31085	-3.47006	-4.43218	-5.96605	-5.64549	-3.98019	-8.54485	-3.1198	5.56107	-4.26352	3.60382	-4.61716	-8.37736	-5.69061	4.2286	-7.20262	-0.107841	-0.831524	-12.3117	-2.69928	3.35066	-3.38015	-4.37474	-3.74004	1.13673	-14.3661	-1.1217	#VALUE!	-2.9752	-9.21463	-13.1226
K-8	-8.07479	5.0088	-7.74557	-3.58256	-5.6059	-4.65095	-6.30228	-10.0097	-5.37038	-8.06925	-0.944691	-10.3895	3.26492	-5.11873	-2.5266	-3.65875	-4.56582	-6.49795	-6.20992	-4.56901	-8.39844	-3.50469	5.65937	-5.36897	3.63913	-5.20943	-9.02633	-6.49999	4.73103	-7.55193	-0.452523	-1.04954	-11.9848	-3.11674	3.03269	-3.46342	-4.5205	-4.2902	0.499398	#VALUE!	-9.49512	-14.8766	-4.06481	-10.0874	-11.8132
K-9	-7.66048	5.98748	-6.87275	-3.38297	-4.63438	-4.14411	-5.54359	-10.9082	-4.0965	-7.21431	0.71121	-9.31872	4.61475	-5.08921	-3.25296	-3.27632	-3.75238	-5.47513	-6.3778	-3.54862	-7.56427	-3.50881	6.0018	-4.96938	4.86431	-4.45223	-7.8554	-6.05518	6.14045	-6.76856	0.10265	0.182831	-11.9393	-3.01381	4.24755	-3.79385	-4.78989	-4.30127	1.08693	-13.8996	-9.03599	#VALUE!	-4.63159	-9.3652	#VALUE!
L-1	-7.48756	4.58707	-5.92183	-3.70955	-4.8703	-4.59141	-4.80226	-10.1442	-3.84102	-7.34876	-1.95553	-9.83513	5.86804	-4.59619	-3.7073	-3.80443	-3.14339	-6.11051	-5.22545	-2.86034	-6.6693	-4.04349	5.70778	-4.89031	1.80227	-3.76336	-12.882	-7.89205	4.85187	-5.89273	-1.34429	0.265419	-10.8609	-3.22837	3.89466	-4.05593	-5.5919	-4.72855	-0.937418	#VALUE!	5.18113	#VALUE!	-3.96196	-14.0008	-13.2757
L-2	-8.32485	5.162	-8.03546	-3.65157	-5.15242	-4.71996	-6.24161	-9.64924	-4.65352	-8.18538	-2.3476	-10.3588	4.60005	-5.20198	-2.7468	-3.66051	-4.17914	-6.21769	-6.00308	-3.72466	-8.04769	-3.79067	6.03675	-4.37266	2.76482	-4.48094	-10.4536	-7.32495	4.77795	-6.83601	-1.3289	-0.601118	-11.7464	-3.66327	3.98049	-3.66534	-5.33561	-4.63473	-0.431802	#VALUE!	-11.0891	-13.7701	-3.82506	-11.3559	-11.6988
L-3	-7.60838	4.19589	-6.07901	-3.09389	-4.46318	-3.7986	-5.1235	-9.63767	-3.62717	-7.15683	-1.62213	-9.59925	4.09035	-4.88697	-3.00018	-3.06581	-3.24312	-5.3747	-5.18988	-2.57896	-6.66203	-3.48028	5.97548	-4.5188	2.51088	-3.41161	-10.061	-6.19263	5.08976	-6.01087	-1.06251	0.546444	-10.6293	-3.89616	3.4273	-3.97605	-4.96991	-4.29729	-0.398991	#VALUE!	3.76762	#VALUE!	-4.09675	-9.41027	-12.2264
L-4	-7.63796	4.4478	-5.4573	-2.67462	-3.96675	-3.17206	-4.50742	-9.0348	-3.18004	-6.95927	-1.9029	-9.43468	4.07085	-4.62835	-4.69042	-2.75465	-2.91332	-4.74231	-4.70562	-2.62359	-6.57279	-3.90873	5.13461	-4.54515	2.57987	-2.89094	-10.3554	-5.13879	4.08027	-5.14132	-1.03286	0.922087	-10.644	-3.63556	3.39509	-3.93396	-3.96706	-3.75874	-0.214822	#VALUE!	-3.27503	-14.457	-4.20774	-13.0484	-10.4527
L-5	-7.42362	4.47185	-6.14387	-2.81204	-3.95427	-3.64542	-5.00562	-10.6844	-3.41735	-7.47585	-0.986843	-10.4642	4.26884	-4.6791	-3.32224	-2.82627	-3.21082	-4.82456	-5.22293	-2.7236	-7.00117	-3.04085	6.26943	-3.80631	3.40004	-3.53242	-9.56632	-5.37102	4.74694	-5.48876	-0.379268	0.513767	-10.5351	-2.95531	4.11304	-3.79644	-5.05951	-3.99244	0.398983	#VALUE!	-0.536359	-13.4406	-1.93044	-12.3074	-9.14156
L-6	-6.90991	-7.37141	-6.17824	-2.7085	-5.23639	-3.82753	-5.26957	-8.9	-3.98278	-7.57389	0.058025	-9.15869	4.18465	-4.55961	-3.24412	-2.96083	-3.7231	-5.45983	-5.22962	-3.083	-7.06521	-2.6557	5.86863	-4.08166	4.40063	-3.24245	-8.25292	-5.25492	5.13479	-5.74995	0.330286	0.187693	-10.4868	-3.14831	4.02857	-4.43349	-3.80436	-3.97301	1.07777	#VALUE!	-1.61819	#VALUE!	-3.10392	-10.1399	-10.0334
L-7	-7.33826	3.97545	-6.84217	-3.11022	-4.64304	-3.50327	-5.4903	-10.6181	-4.04261	-7.60935	-1.83481	-9.988	3.74815	-4.37875	-3.83109	-2.98898	-3.77917	-5.82533	-5.35937	-3.50072	-6.78085	-3.17632	5.73533	-5.06457	3.23663	-4.09476	-8.16529	-5.3775	4.54214	-6.24615	-0.925864	-0.112803	-10.2575	-3.83095	0.408524	-3.74814	-5.1734	-4.34499	-0.498815	-13.7848	-6.95645	#VALUE!	-4.87714	-8.95412	-9.71776
L-8	-7.61419	4.29416	-7.45327	-3.56237	-5.3154	-4.12164	-5.50472	-11.8281	-4.54494	-8.02988	-3.87945	-10.2925	-3.21585	-4.76932	-12.4863	-3.66735	-4.4273	-6.43038	-5.82256	-3.91219	-7.63752	-3.80237	5.88685	-5.30375	3.08268	-4.88975	-9.31324	-7.06424	4.76448	-6.93932	-1.54139	-0.65509	-11.8402	-4.45871	-2.30437	-3.787	-6.53177	-4.60671	-1.01166	#VALUE!	-8.73528	#VALUE!	-5.29814	-9.70339	-10.2587
L-9	-6.369	5.36173	-5.79405	-2.74745	-4.31586	-3.37132	-4.39882	-8.15305	-3.17706	-6.1304	-1.7551	-8.29704	0.418085	-4.4932	-4.62915	-2.70372	-3.09862	-5.0312	-5.00501	-2.62864	-6.06373	-2.9053	6.22517	-4.22427	4.83802	-3.26303	-9.35968	-5.75494	6.50683	-5.47019	-0.0625386	0.961226	-10.2324	-2.66169	4.57124	-4.42096	-4.61088	-4.05416	-0.0186651	#VALUE!	1.22957	#VALUE!	-2.30663	-9.50961	-11.5923
M-1	-8.56964	4.2178	-7.1009	-3.72444	-5.09115	-5.02866	-5.91524	-9.75762	-4.05847	-7.53998	-2.62508	-10.8511	4.14123	-5.10699	-4.72213	-4.03455	-3.63397	-5.99722	-6.49131	-3.26598	-7.36631	-4.62889	5.1187	-6.57355	2.50007	-4.57437	-13.5524	-7.70676	4.75174	-6.58069	-1.99673	-0.107403	-12.3716	-4.81945	2.57984	-4.43798	-6.55961	-4.62887	-2.04014	-15.7997	-1.6233	#VALUE!	-4.09717	-18.1481	-13.2916
M-2	-7.84897	4.64232	-7.35965	-3.09109	-5.1168	-4.04429	-5.35011	-9.14355	-3.48629	-7.12049	-2.61497	-9.46504	4.59694	-4.88408	-4.41659	-3.17953	-3.4746	-5.65313	-5.5186	-2.91426	-6.78036	-3.35967	6.17455	-4.14806	2.83781	-3.99903	-10.3258	-6.66277	5.73548	-6.17843	-0.721614	0.786932	-11.3341	-4.2197	3.70931	-4.19388	-5.7404	-4.69179	-0.0525868	#VALUE!	-0.767817	#VALUE!	-2.10341	-11.1518	-10.882
M-3	-7.27195	-22.0374	-6.06121	-2.99338	-4.44036	-3.62645	-5.16499	-8.3207	-3.35223	-6.75042	-1.72965	-9.51736	3.6102	-4.87055	-10.4822	-3.29418	-3.34733	-5.15529	-5.18428	-2.72765	-6.69521	-4.03687	4.75323	-5.32653	3.85492	-3.61806	-9.93018	-5.60885	3.99485	-5.84938	-1.21418	0.557687	-10.826	-4.26487	2.83312	-4.77863	-5.08739	-4.32904	-1.06017	#VALUE!	5.51363	-14.5567	-4.63219	-13.6494	-10.1321
M-4	-8.02219	3.23685	-7.09423	-3.36984	-4.65005	-3.90088	-5.8339	-9.15396	-3.9216	-7.63871	-2.31361	-10.0677	3.5893	-4.97044	-3.5274	-3.53022	-3.97172	-5.54806	-5.77397	-3.21178	-7.57016	-4.04323	5.15248	-4.93539	2.37834	-4.50285	-9.3418	-5.83193	4.34395	-6.58744	-1.26923	-0.187184	-11.179	-4.153	2.39193	-4.09006	-5.54207	-4.0439	-1.32157	-14.3752	-10.2455	-13.3756	-3.62239	-11.0104	-9.56917
M-5	-7.55615	4.17498	-7.30605	-3.49872	-4.89023	-4.37916	-5.54678	-8.97122	-4.00336	-7.62357	-2.33631	-10.2708	3.88672	-4.92098	-3.94888	-3.66738	-4.11469	-5.95457	-6.03126	-3.20459	-7.54657	-3.93401	5.74257	-5.2186	2.79818	-4.48718	-9.55419	-6.86768	3.81872	-6.66441	-1.12488	-0.0271474	-11.2236	-4.19298	3.20068	-4.13078	-5.52877	-4.17188	-0.605575	#VALUE!	3.0025	#VALUE!	-4.7896	-11.247	-9.48405
M-6	-5.63949	-8.07145	-6.20437	-2.85918	-5.14447	-4.00003	-5.40296	-8.5609	-3.79339	-7.21907	0.70863	-9.18752	4.53448	-4.56123	-2.85765	-3.44187	-4.34504	-5.64421	-5.19252	-2.97324	-6.86991	-2.70098	6.17048	-3.90601	4.54172	-3.84221	-7.2547	-5.55997	4.50721	-6.35997	1.37994	0.216722	-10.3601	-2.77757	4.95068	-4.61625	-4.04571	-3.879	1.83501	#VALUE!	-5.18313	-8.91547	-4.70455	-7.41318	-8.64968
M-7	-7.61576	-7.1293	-6.31428	-2.97058	-4.81031	-3.88675	-5.21809	-10.0032	-3.69473	-7.11829	-1.87467	-9.75506	5.72937	-4.56104	-4.48467	-3.35578	-3.59349	-5.72609	-4.89388	-3.29013	-6.96276	-3.63699	5.64326	-4.74158	-1.71981	-4.0526	-9.32297	-5.8484	4.0904	-6.47808	-0.543223	0.43898	-10.6578	-3.65921	3.66497	-4.61664	-5.60257	-4.39454	0.542399	-14.4588	-1.65227	#VALUE!	-5.92881	-9.94508	-9.97812
M-8	-7.70319	4.82943	-7.06082	-3.67759	-4.82991	-3.95999	-5.16121	-9.77774	-4.00305	-7.27895	-3.107	-9.99581	-2.81217	-4.80729	-4.51138	-3.71964	-3.97249	-5.79462	-5.86421	-3.39423	-7.00055	-3.74094	6.55941	-4.9651	-1.09439	-4.37309	-9.78889	-6.84789	5.00417	-6.74202	-1.15785	0.137739	-11.2431	-4.53952	4.13372	-4.25314	-5.46352	-4.38246	0.412325	#VALUE!	-3.63728	-12.8283	-5.52027	-8.88056	-9.42094
M-9	-6.35376	-5.33011	-6.08808	-2.99991	-4.28744	-3.22791	-4.74422	-8.67588	-3.72582	-7.07876	0.596874	-8.51826	4.94652	-4.66533	-4.03257	-3.34926	-3.72466	-5.52851	-5.63689	-2.99343	-6.71867	-3.01523	6.13829	-4.95589	5.15156	-4.07621	-8.29417	-6.18882	5.08684	-6.24404	-0.0238992	0.248422	-10.2899	-2.47611	4.58928	-4.55086	-4.73814	-3.71834	1.06369	#VALUE!	-5.06999	#VALUE!	-5.15273	-7.51609	-9.55881
N-1	-8.42478	4.21766	-7.37334	-3.83692	-4.56678	-4.2439	-5.51861	-9.70015	-4.18989	-7.33348	-0.488151	-10.7616	4.57123	-4.6626	-4.54981	-3.84046	-3.87283	-5.98504	-6.2838	-2.74349	-7.02675	-4.17702	5.1627	-5.65958	2.43073	-4.61908	-11.532	-6.99243	4.86477	-6.22607	-1.73243	-0.448018	-11.6319	-3.64012	2.71744	-3.95645	-5.02752	-3.85919	-0.00513438	#VALUE!	4.50515	-16.7831	-4.6374	-13.4136	-11.4603
N-2	-9.07024	-9.30801	-7.20565	-3.28082	-4.61025	-4.057	-5.96539	-10.4571	-4.02583	-7.95985	-1.73345	-10.219	3.68144	-4.99768	-3.38058	-3.38443	-4.0882	-5.98917	-6.48414	-2.76465	-7.16403	-4.20839	5.60526	-5.09449	2.69282	-4.16789	-10.0485	-7.09992	5.30801	-6.54736	-1.47564	-0.131198	-11.9222	-3.77687	3.47062	-4.03689	-5.60024	-4.34943	0.0501767	#VALUE!	-7.64824	#VALUE!	-3.44903	-12.154	-11.0793
N-3	-8.9559	-11.8788	-7.63279	-3.32554	-4.91226	-3.88708	-5.85355	-10.937	-4.63101	-8.01858	-2.28958	-11.2082	4.15378	-5.04294	-14.8346	-3.36649	-4.44836	-6.22314	-6.73786	-3.33172	-7.7731	-3.98693	4.95434	-5.74748	2.41558	-4.67829	-9.23676	-6.66505	4.18212	-7.00763	-1.69972	-0.70551	-11.4781	-4.18224	1.14485	-3.82285	-5.09103	-4.31936	-0.743462	#VALUE!	4.13045	-13.8955	-4.33622	-9.03775	-10.2608
N-4	-9.17822	4.1493	-8.55752	-3.82618	-5.14936	-4.28398	-6.61016	-11.3505	-5.12579	-8.42455	-1.56093	-11.2995	2.96511	-5.14811	-9.89901	-3.98835	-5.13245	-6.57898	-7.05431	-3.95906	-8.29269	-4.83752	4.4524	-5.7258	1.35213	-5.66938	-9.2477	-6.28016	3.73951	-7.51216	-1.84822	-1.43217	-12.3101	-4.96716	1.51015	-3.76103	-5.26972	-4.28244	-1.37752	-20.6305	4.18894	-14.4987	-4.87078	-8.89301	-14.0916
N-5	-9.07801	-10.497	-8.31927	-3.7668	-4.78569	-4.18244	-6.80065	-10.9818	-5.30212	-9.16823	-2.44091	-11.4205	2.80749	-5.29812	-10.636	-3.63419	-5.05918	-6.39131	-7.24951	-4.01977	-8.37983	-4.66788	4.39056	-6.00466	1.49597	-5.50764	-9.23677	-6.76028	3.87139	-7.49373	-2.18734	-1.39575	-12.0971	-5.1192	2.25855	-3.85177	-5.86995	-4.4508	-1.06102	-21.9799	-10.9832	-16.5766	-4.71629	-10.3148	-12.1009
N-6	-8.85323	4.27643	-8.09685	-3.69223	-5.02687	-4.28732	-6.49406	-12.7159	-5.41925	-9.05145	-1.19363	-11.5345	3.77656	-5.22049	-3.99444	-3.86779	-5.10299	-6.37407	-6.62535	-4.02896	-8.41073	-3.8977	5.10053	-5.10144	3.01525	-5.22842	-9.37266	-6.49347	3.64722	-7.48916	-0.998165	-1.33614	-11.7827	-4.13969	2.5356	-3.91784	-4.97476	-4.26106	-0.381324	-15.1551	-2.82868	-15.1245	-4.58033	-12.5255	-11.5585
N-7	-8.46971	4.26805	-7.73448	-3.38795	-4.7296	-4.03771	-5.95261	-11.1693	-4.33812	-7.89771	-1.11468	-10.867	3.87373	-4.98948	-3.20234	-3.48124	-4.2128	-5.66074	-5.9228	-3.07337	-7.03879	-3.7148	5.41715	-4.91434	2.76016	-4.5736	-9.47418	-5.54207	4.64768	-6.92968	-1.01265	-0.50822	-11.3203	-4.27464	3.08905	-4.04014	-5.12743	-4.13155	-0.181533	-16.5585	5.74517	#VALUE!	-3.98926	-9.84797	-9.43565
N-8	-7.90862	5.13313	-6.73526	-2.93254	-3.53478	-3.29489	-5.24891	-10.2503	-3.82368	-7.81807	-1.74362	-11.1215	5.00451	-4.48634	-3.68172	-3.01245	-3.62039	-5.06047	-5.30723	-2.65807	-6.74373	-3.65457	6.20501	-5.60524	4.21212	-4.06645	-9.21734	-6.34706	6.09375	-5.9927	-0.665703	0.00308832	-10.6908	-3.19021	4.06848	-3.44011	-5.18172	-4.23846	0.147221	-14.7374	5.25403	#VALUE!	-3.57336	#VALUE!	-9.88153
N-9	-8.40815	4.57746	-9.07654	-3.75461	-4.77115	-4.60332	-6.38601	-10.6296	-4.90945	-8.79767	-1.14088	-12.9644	4.96948	-5.27551	-3.25449	-3.90567	-4.70154	-6.29567	-6.59461	-3.68791	-7.98619	-3.86894	5.55296	-5.76618	3.08036	-5.43393	-9.22961	-6.97226	4.91257	-7.372	-1.06895	-1.12237	-11.8758	-3.31589	2.90773	-3.82478	-5.14411	-4.33262	0.0148815	-17.3314	5.73553	#VALUE!	-4.98237	-10.2451	#VALUE!
O-1	-8.26724	3.7374	-7.39743	-4.07456	-5.11211	-4.48202	-5.86407	-9.74184	-4.70744	-7.77211	-1.66072	-10.1473	4.30524	-5.04989	-4.14953	-4.15143	-4.35778	-6.62718	-6.51764	-3.69613	-7.43938	-4.45973	5.43836	-6.15526	2.8353	-5.30402	-11.5318	-7.70192	4.96161	-6.47324	-1.84987	-0.788539	-11.0977	-4.65205	3.35548	-3.45233	-6.30699	-4.72497	-0.714465	#VALUE!	-1.14527	-14.4998	-4.09199	-8.62788	-10.3181
O-2	-7.71505	3.74523	-7.13983	-3.75176	-4.86138	-4.28519	-5.49882	-10.7192	-4.80302	-8.48641	-2.59526	-10.1478	3.38364	-4.87619	-4.36087	-3.90728	-4.12927	-6.27758	-5.9796	-3.99938	-7.31125	-4.7349	4.74202	-6.43464	2.03826	-4.48901	-10.4476	-5.88529	3.48215	-6.51344	-1.92122	-0.764631	-11.2453	-4.13445	2.45147	-3.62049	-5.63965	-4.45978	-1.41499	#VALUE!	3.74897	-17.0315	-4.7122	-9.47348	-12.0651
O-3	-7.87606	3.03135	-6.67527	-3.13739	-4.94408	-3.88952	-5.64274	-9.654	-4.11319	-8.13585	-2.86153	-10.2984	3.26908	-5.07384	-4.27316	-3.15459	-3.76072	-5.68964	-5.49905	-3.49126	-7.03079	-4.84875	4.8887	-5.5954	1.73203	-3.50043	-9.4403	-6.46018	3.90215	-5.98798	-1.41839	-0.111218	-10.7379	-4.80686	1.75237	-3.69165	-4.95046	-4.29744	-0.908581	#VALUE!	3.91587	-16.7966	-4.28104	-9.44106	-10.0288
O-4	-7.11835	3.50919	-6.21871	-3.39046	-4.27603	-3.82511	-4.99783	-11.1567	-4.38056	-8.14882	-0.678693	-9.52896	3.59811	-4.66924	-4.98563	-3.60032	-3.76837	-5.39815	-5.39817	-3.57434	-7.00883	-4.32873	5.09837	-6.08603	2.74955	-4.19905	-9.59025	-5.52839	5.08344	-5.94119	-1.41827	-0.580024	-10.5502	-3.89403	3.06298	-3.5106	-4.92063	-4.13061	-0.212125	#VALUE!	3.68934	-14.3266	-4.913	#VALUE!	-10.4299
O-5	-8.12911	4.83492	-7.83222	-3.76113	-5.01108	-4.1124	-6.08507	-9.64895	-5.3131	-8.96634	-1.78386	-10.7263	4.01056	-4.9571	-4.05792	-4.00606	-4.5859	-6.3469	-6.63026	-4.31099	-7.68354	-3.78846	5.16133	-5.86774	3.05384	-5.16485	-8.69124	-5.99832	4.30905	-7.14269	-1.12791	-1.18992	-11.4071	-3.52795	3.0516	-3.59736	-5.53449	-4.49642	-0.125806	#VALUE!	6.06939	-13.5982	-4.69901	-10.2808	-8.81826
O-6	-7.72826	3.92987	-8.75505	-3.92109	-5.61614	-4.55755	-6.73907	-10.7003	-5.38836	-9.32581	0.520118	-11.0769	3.20032	-5.3178	-3.34244	-4.11222	-4.77418	-6.34563	-6.2793	-4.54184	-8.38042	-3.64371	5.71769	-5.02046	3.18326	-5.17397	-9.00075	-7.20508	4.38948	-7.51643	-0.855004	-1.46546	-11.5897	-4.479	3.5571	-3.71054	-4.71852	-4.20809	0.0399596	#VALUE!	4.59895	-15.4889	-4.14414	-11.5413	-9.93845
O-7	-7.49082	4.30895	-6.6161	-3.5155	-4.71344	-3.96008	-5.62191	-10.5953	-4.49936	-7.94129	-1.31023	-10.3663	4.20794	-4.72437	-3.46191	-3.73674	-4.11676	-5.95244	-5.49189	-3.68402	-7.44447	-3.51576	5.72233	-5.84897	2.95927	-4.43524	-9.45515	-6.01529	4.5689	-6.25389	-0.988063	-0.766448	-10.596	-3.56927	3.24784	-3.49244	-5.72036	-4.3841	0.337399	#VALUE!	-1.79758	-13.1198	-4.43396	-14.1402	-9.69887
O-8	-7.63871	5.62592	-8.13259	-3.65397	-5.16908	-4.29418	-6.00682	-10.5928	-4.80416	-8.32102	-1.17584	-11.1969	4.04952	-5.35969	-9.87455	-3.7857	-4.4395	-6.26351	-6.34087	-3.96742	-7.61539	-3.82139	5.51621	-5.62713	3.30278	-5.03814	-10.4142	-6.96484	4.26028	-6.90568	-1.24178	-1.00029	-11.3828	-3.95731	3.29786	-3.72609	-5.48889	-4.6903	0.508423	#VALUE!	-1.45996	-14.387	-4.98127	-10.2986	-10.9267
O-9	-7.36246	4.31681	-7.86262	-3.62731	-5.28334	-4.31801	-6.26138	-10.4491	-5.20541	-8.40256	-1.70653	-9.81808	2.90841	-5.02928	-2.07401	-3.87154	-4.69425	-6.10119	-6.52168	-4.174	-8.10232	-4.01864	4.96716	-5.7398	2.94937	-4.98744	-9.10821	-6.62508	4.09064	-7.12533	-0.906004	-1.18608	-11.3362	-3.9811	2.75973	-3.83477	-4.71377	-4.33244	0.219793	#VALUE!	3.16759	-17.9095	-5.09312	-7.61647	-13.1114
P-1	-8.4101	3.11216	-7.32387	-4.00181	-4.97112	-4.67728	-5.87079	-10.2465	-4.423	-8.05189	-2.25501	-9.59666	4.51452	-4.57786	-5.18712	-4.1429	-4.09792	-6.24351	-6.14178	-3.75985	-7.89277	-4.34558	5.2557	-6.55561	1.8899	-4.61906	-9.98228	-7.51109	4.51338	-6.87961	-1.60168	-0.722218	-10.579	-4.20944	3.00564	-3.43715	-6.40345	-4.10213	-0.357692	#VALUE!	-0.377173	#VALUE!	-5.27793	-11.367	-8.84258
P-2	-7.93437	3.34407	-6.89178	-3.66447	-4.91409	-4.14251	-5.66494	-9.2775	-4.38726	-7.01708	-2.05896	-9.7714	5.30368	-4.71855	-4.26405	-3.61565	-3.77075	-5.69219	-5.47306	-3.40758	-7.50627	-3.5328	5.94789	-5.05963	2.68683	-4.14358	-9.50284	-6.58355	5.83391	-6.27662	-1.13805	-0.284567	-10.3675	-3.89882	3.50193	-3.51893	-5.65695	-4.3952	0.635718	#VALUE!	1.34762	#VALUE!	-4.119	-9.99283	-8.44072
P-3	-7.46889	-7.59348	-6.39218	-3.35547	-4.75464	-3.87234	-5.18951	-8.31266	-4.02297	-7.21192	-2.09972	-9.21108	4.5299	-4.64145	-3.86831	-3.33403	-3.86876	-5.67898	-5.27066	-3.24831	-6.92506	-3.15367	6.34966	-4.82634	3.2649	-4.0139	-8.55145	-5.15827	5.3296	-6.17125	-0.405779	0.134207	-10.2578	-3.23284	3.9876	-3.48124	-5.78245	-4.30476	1.13017	-15.0557	5.73592	#VALUE!	-4.10591	-10.7723	-8.75174
P-4	-7.00701	-10.2431	-6.95872	-3.72326	-4.84124	-4.06692	-5.4071	-9.77296	-4.48138	-7.921	-2.1402	-9.57619	2.18612	-4.83234	-6.35896	-3.91528	-4.12358	-5.61695	-5.39486	-3.90368	-7.42536	-5.24873	3.96997	-7.10272	1.90425	-4.62879	-9.62395	-6.15079	2.81356	-6.17949	-2.15392	-0.485106	-10.2157	-4.65572	2.53396	-3.65023	-4.48814	-4.01185	-0.832418	-21.4914	-1.42015	#VALUE!	-6.21201	-10.3233	-10.5399
P-5	-6.6014	5.08754	-5.53937	-2.92334	-4.35508	-3.67246	-4.91314	-8.83488	-3.47933	-6.7794	-2.19991	-8.22675	4.00225	-4.50536	-3.68328	-3.20861	-3.02546	-5.10668	-4.76817	-2.63392	-6.66574	-3.53265	5.87295	-5.33947	3.26861	-3.54696	-9.89386	-6.12523	4.54572	-5.56637	-0.603872	0.694441	-9.46421	-3.52075	4.13682	-3.88897	-4.81546	-4.02559	0.456583	#VALUE!	-3.06686	-11.7298	-4.60275	-13.8327	-9.45478
P-6	-7.44495	5.05013	-7.64129	-3.66827	-5.65628	-4.78359	-5.95213	-9.67155	-4.72886	-7.6861	-0.721522	-10.693	4.98715	-4.88561	-2.60296	-3.89131	-4.33634	-6.57115	-6.21867	-3.66073	-7.84562	-2.73609	6.41474	-4.9259	3.59017	-4.99813	-9.15522	-7.22311	4.57568	-6.88968	0.0247687	-0.490883	-9.90672	-2.96885	4.39724	-3.85559	-5.60132	-4.63671	0.995123	#VALUE!	-2.84628	#VALUE!	-4.77845	-9.34498	-8.09093
P-7	-7.22024	4.70961	-8.07283	-3.91428	-5.28076	-4.76962	-5.2493	-10.3636	-4.84755	-7.61171	-1.39666	-11.0688	5.5904	-4.37417	-3.62933	-4.2436	-4.1414	-5.80681	-6.37501	-3.63665	-7.78626	-2.90424	5.71338	-7.06816	4.10194	-5.77355	-9.54668	-7.07963	5.58269	-6.7038	-0.625856	-0.831964	-10.0457	-2.21772	4.27097	-3.24643	-5.6078	-4.19543	0.545068	#VALUE!	-3.16093	#VALUE!	-5.66388	#VALUE!	-7.815
P-8	-7.88141	-8.7841	-7.5396	-3.92799	-5.29601	-4.7541	-5.98257	-10.5124	-4.76639	-7.57662	-2.53458	-10.6143	4.17699	-5.21158	-8.49985	-4.13503	-4.58175	-6.34018	-6.16594	-3.98661	-8.01366	-3.98734	5.71113	-5.75197	2.92627	-5.76468	-9.81517	-7.16175	4.79811	-6.80546	-0.788241	-0.978777	-10.6423	-4.05664	3.1515	-3.60194	-6.01059	-4.95052	0.590803	#VALUE!	-2.01775	#VALUE!	-5.31196	-11.0793	-9.16933
P-9	-7.45018	-7.53926	-7.65189	-4.18423	-5.6852	-4.82863	-5.99058	-10.1054	-4.87191	-8.08894	-1.82509	-10.0522	4.18659	-5.22929	-4.25583	-4.24234	-4.45555	-6.39536	-6.32934	-4.22124	-7.92729	-3.78545	5.98449	-5.56162	3.89	-5.44411	-9.16357	-7.09003	5.10608	-7.18648	-0.350438	-0.998911	-10.4791	-3.89837	3.63087	-3.71338	-5.82468	-4.62302	0.554034	#VALUE!	-0.439246	-17.0082	-5.55732	-9.40686	-9.50791
Q-1	-5.75171	4.47296	-4.63343	-2.14682	-4.07604	-3.63397	-3.04374	-7.65364	-2.36484	-5.28007	-0.341548	-8.06764	4.91184	-3.14057	-2.70395	-1.90828	-2.43789	-4.02682	-5.00493	-1.77049	-6.20647	-1.48961	6.19069	-3.05	4.36379	-2.98763	-8.62127	-2.49341	5.1113	-4.39438	-0.753693	0.994839	-9.03744	-2.06047	4.5137	-3.19331	-2.0222	-1.9349	0.0896891	#VALUE!	#VALUE!	#VALUE!	-3.93334	-6.02271	-10.9381
Q-2	-6.27366	4.1214	-5.50315	-2.76761	-4.77004	-4.30346	-3.78074	-7.54408	-3.17587	-6.12775	-2.80816	-9.8105	4.52914	-3.61705	-4.21261	-2.78909	-2.66611	-5.26516	-5.40858	-2.36503	-6.76908	-2.8633	5.72504	-4.62811	3.75168	-3.22923	-11.3438	-5.30774	4.9382	-5.09501	-2.27722	0.651278	-9.5079	-3.19852	4.62498	-3.37303	-4.02162	-2.85365	-1.41563	#VALUE!	-4.11714	#VALUE!	-13.0744	-11.3485	-10.9632
Q-3	-6.27126	5.40394	-7.07545	-3.18531	-5.36268	-4.57918	-4.95532	-9.77322	-3.83903	-6.88882	-1.46458	-10.4563	5.57012	-3.97203	-8.68512	-3.28881	-3.27932	-5.5964	-6.36734	-2.89202	-7.37191	-1.90334	6.6269	-2.7024	4.68588	-4.3665	-10.1111	-4.89414	5.66715	-6.1106	-1.33343	-0.130074	-9.42966	-1.78697	5.80904	-3.22618	-3.99152	-2.6961	0.487226	#VALUE!	#VALUE!	-8.17023	-12.8379	-10.8652	-11.382
Q-4	-6.56881	4.56641	-5.63639	-2.5029	-4.88448	-4.19616	-3.87522	-8.04527	-2.75162	-5.84467	-1.95786	-8.84108	5.14926	-3.86772	-3.03437	-2.57115	-2.4374	-4.97779	-5.26541	-1.97298	-6.3849	-1.92543	6.24733	-2.61033	3.71032	-3.13544	-10.8367	-4.15603	5.65257	-5.1103	-1.38437	0.957787	-9.77025	-2.33458	5.35252	-3.70329	-4.16417	-3.00676	-0.113756	-15.0905	-5.93491	-9.81793	-4.4708	-12.714	-9.76866
Q-5	-6.16547	4.26309	-6.6017	-3.01118	-5.06526	-4.44598	-4.65778	-8.21743	-3.50464	-6.59596	-2.70698	-9.86003	4.67637	-3.79267	-3.46799	-2.87131	-3.08113	-5.27186	-5.91044	-2.85849	-6.79095	-2.19552	5.59652	-4.1437	4.20066	-3.54629	-9.10406	-4.26817	4.90886	-5.69041	-1.33893	0.128143	-10.0625	-2.70069	4.38232	-3.59487	-3.67054	-2.84955	-0.359011	-16.8416	#VALUE!	-9.10817	-6.56136	-9.10845	-9.89122
Q-6	-7.07703	4.0882	-7.72379	-3.28127	-5.52839	-4.90134	-5.02606	-8.69682	-3.88261	-7.08154	-3.60957	-10.5561	4.45142	-3.97203	-16.3181	-3.20098	-3.53953	-6.15621	-6.21497	-2.83002	-7.33453	-2.55884	6.09254	-2.97602	3.9271	-4.13351	-10.3785	-5.20888	4.66238	-6.40891	-2.09985	-0.295776	-10.5439	-2.79409	4.14695	-3.35572	-4.69961	-3.39292	-0.269381	#VALUE!	#VALUE!	#VALUE!	-7.71652	-9.79869	-11.0315
Q-7	-4.72411	-6.85921	-4.92929	-2.20341	-3.96196	-3.44517	-3.5877	-6.33279	-3.14874	-6.28004	1.52284	-8.49605	5.18598	-3.00448	-0.833586	-2.09703	-3.00661	-4.31664	-5.25353	-1.9596	-6.92281	-0.281001	6.67492	-0.710269	5.8637	-3.35584	-6.33063	-2.50289	5.76227	-5.2121	0.782664	0.0122659	-10.0234	-0.636975	5.13114	-3.10934	-1.39192	-1.78147	2.79588	-16.4909	5.8743	-5.99869	-1.99704	-3.65624	-8.79119
Q-8	-6.15085	5.41452	-6.39437	-2.73779	-4.81845	-3.82411	-4.50626	-7.93765	-3.36226	-6.3604	-1.64357	-9.90126	2.09275	-3.62258	-8.11417	-2.72297	-2.89351	-5.1983	-5.649	-2.59255	-6.44905	-2.04795	6.54136	-3.89382	5.06708	-3.80183	-9.32158	-5.22227	5.78835	-5.64754	-1.31216	0.263216	-10.4434	-1.57106	5.19176	-3.53964	-4.13607	-2.97407	0.446434	#VALUE!	-3.06356	#VALUE!	-7.38386	-8.09351	#VALUE!
Q-9	-5.2782	-7.99675	-5.94969	-2.55796	-4.71018	-3.71861	-4.35434	-7.70431	-2.7282	-6.09406	-1.45619	-9.03762	3.02639	-3.72509	-12.9546	-2.48572	-2.91845	-5.16593	-5.64669	-2.41438	-6.15448	-2.39434	6.6129	-3.80745	4.70734	-3.35922	-9.605	-4.35602	5.02878	-5.45008	-0.927813	0.707213	-9.42477	-2.79951	5.09695	-3.82903	-3.29757	-2.72305	-0.775653	#VALUE!	#VALUE!	-4.26825	-9.64787	-9.55761	-10.4932
R-1	-6.51007	-17.9978	-6.31025	-2.61275	-4.75303	-4.06859	-4.46988	-8.31215	-2.7236	-6.08373	-1.71594	-8.76937	4.11937	-3.71153	-1.911	-2.55612	-2.46234	-5.08135	-5.35317	-2.16229	-6.75465	-1.3808	6.57149	-2.77439	4.75672	-3.60086	-8.92283	-4.37788	5.77953	-5.49644	-1.08562	0.248012	-10.0894	-2.13321	2.37425	-3.12244	-3.40144	-2.30299	0.280615	#VALUE!	-8.82312	#VALUE!	-2.99629	-6.32761	-8.07579
R-2	-6.53027	-7.0778	-6.58972	-2.70598	-4.47129	-4.37133	-4.91289	-8.0991	-2.56011	-6.13656	-2.44124	-8.87555	-8.17933	-3.86527	-2.44716	-2.54345	-2.57589	-5.27215	-5.6033	-2.11921	-6.60878	-2.51917	5.8584	-3.0516	4.47902	-3.2923	-10.082	-4.52182	5.65298	-5.48743	-1.89021	0.630166	-11.2469	-2.31232	4.59223	-3.31847	-3.40757	-3.2935	-0.749852	#VALUE!	#VALUE!	#VALUE!	-3.29307	-8.07674	-10.8566
R-3	-6.19688	6.18443	-6.40466	-2.56005	-4.46312	-4.25671	-5.10117	-9.43221	-3.15491	-6.55845	-1.18371	-9.16294	4.9393	-4.07801	-0.847723	-2.58831	-2.75701	-4.95445	-5.12659	-2.24876	-7.114	-1.47559	7.03413	-2.01877	5.90966	-3.55822	-6.97036	-3.58445	6.02902	-5.89258	-0.321821	0.15979	-10.9216	-1.41057	5.24873	-3.14858	-2.75833	-2.60267	1.62013	#VALUE!	1.11038	-6.00927	-2.29632	-7.4392	-8.39647
R-4	-6.88638	-10.139	-6.42918	-2.94036	-4.80399	-4.35222	-5.29137	-9.32682	-3.40969	-6.71391	-2.92442	-8.95953	3.36399	-4.46211	-18.9204	-2.90645	-3.0548	-5.60045	-5.42564	-2.77052	-7.30192	-3.21265	5.37535	-3.6963	3.42178	-3.746	-8.85979	-4.68473	4.5175	-6.12861	-2.40365	0.110901	-11.0585	-3.44207	3.69311	-3.47909	-3.61291	-3.14838	-1.26489	-17.874	-3.0443	-13.0517	-4.62397	-7.53034	-9.47749
R-5	-7.0364	-8.44843	-7.30338	-3.29719	-5.04641	-4.71485	-5.8713	-9.92688	-3.79647	-6.99905	-2.50593	-9.25311	-2.35976	-4.36947	-2.49511	-3.0303	-3.58268	-6.16771	-6.66223	-3.24479	-7.95737	-2.17789	6.13879	-2.62051	4.98811	-4.7058	-7.57522	-4.56364	4.71044	-6.77513	-1.13981	-0.786874	-11.1466	-2.27635	2.18713	-3.07287	-3.7966	-3.44612	-0.389116	#VALUE!	4.77095	-12.8574	-3.9638	-6.53705	-8.94991
R-6	-6.25878	-17.1311	-8.0909	-3.48002	-5.29407	-4.78862	-5.3687	-9.885	-4.59669	-7.60885	-1.68632	-10.5231	3.60943	-3.94481	-2.75694	-3.27555	-4.18008	-6.41328	-6.97562	-3.78863	-8.36012	-2.22735	5.43515	-2.75864	4.08909	-5.20538	-8.44311	-4.83255	4.10809	-7.07658	-1.57298	-1.43649	-11.4846	-2.81598	4.11166	-3.16316	-3.27479	-3.33646	-0.281817	#VALUE!	-2.41264	#VALUE!	-4.09295	-6.26382	-9.99204
R-7	-7.3171	-10.0429	-6.63435	-2.98689	-4.71031	-4.45608	-4.86575	-8.86782	-3.32547	-6.35065	-2.5305	-10.2251	4.11252	-3.64125	-2.58126	-2.82216	-3.19527	-5.47051	-5.28727	-2.41446	-7.11665	-2.29589	5.81899	-3.33376	4.37425	-3.84581	-8.90584	-3.8369	4.56968	-5.86434	-1.63443	0.154669	-11.0617	-2.37088	4.02792	-3.38411	-3.48304	-2.80516	-0.565725	#VALUE!	-1.2919	-11.2642	-3.37251	-7.14163	-8.78595
R-8	-6.44692	-7.94892	-6.54095	-3.03431	-4.52751	-4.29814	-5.83944	-8.61865	-3.98494	-6.53243	-1.10191	-8.92551	4.91426	-4.55786	-3.30017	-3.39947	-3.57844	-6.01981	-5.70471	-2.81895	-7.06268	-2.95491	5.84289	-3.52852	5.27871	-4.27415	-8.48571	-5.29965	5.09284	-6.41895	-0.688371	-0.255074	-10.8137	-2.3846	5.13647	-3.8968	-3.8198	-2.71424	0.730929	#VALUE!	-6.22177	-5.53352	-5.3767	-7.46485	-9.3374
R-9	-5.9675	4.64262	-6.54027	-2.80195	-4.36652	-3.79765	-5.01224	-7.67136	-3.3442	-5.98286	-1.82292	-8.88421	1.14186	-4.05603	-3.55986	-2.51425	-2.57301	-5.0239	-5.0108	-2.53599	-6.39613	-2.82534	5.90539	-3.73549	4.90258	-3.46341	-7.97609	-4.83739	5.68327	-5.56396	-1.02878	0.385753	-10.779	-2.48763	4.89284	-3.4703	-3.42731	-2.82061	0.159997	#VALUE!	#VALUE!	-9.2806	-5.35181	-7.6351	-10.5999
S-1	-6.26663	5.95638	-5.75442	-1.99164	-3.89152	-3.50387	-4.1001	-6.27408	-2.03219	-5.71451	-1.48569	-8.0049	5.20579	-3.47409	-1.66769	-1.85066	-2.71315	-4.43957	-4.48885	-1.93253	-6.37594	-1.51709	6.9492	-1.72801	4.97665	-2.77629	-8.73048	-3.39202	5.85109	-5.6256	-0.781853	0.848725	-9.08354	-1.95991	5.34743	-3.40196	-2.61875	-2.3993	1.02882	#VALUE!	#VALUE!	-10.5081	-2.08436	-6.9776	-8.08052
S-2	-7.5731	-17.4705	-5.32855	-1.8998	-3.52474	-3.63627	-4.52026	-6.87311	-2.45292	-5.67963	-0.295312	-9.07406	5.69997	-3.94361	-0.961415	-2.28656	-2.90617	-4.45149	-4.60722	-2.07969	-6.45062	-1.07562	7.27794	-1.87902	6.11259	-2.94275	-6.88367	-3.8155	6.80209	-5.91798	-0.413609	0.855771	-9.73825	-1.55326	5.64236	-3.63765	-2.16954	-2.3206	2.73839	#VALUE!	-0.347958	#VALUE!	-2.24264	-9.04993	-9.10486
S-3	-6.88888	-7.22666	-5.49006	-2.11359	-3.46166	-3.59593	-4.10591	-8.62484	-2.2586	-6.18106	-0.995005	-9.06601	4.18738	-3.55769	-1.48715	-1.95177	-3.15512	-4.38672	-5.13791	-2.38953	-6.89529	-1.78245	6.21549	-1.83148	5.10872	-3.04448	-7.74129	-3.031	5.02423	-5.80326	-0.683631	0.587863	-9.82648	-1.35994	5.15685	-3.27969	-2.22246	-2.43416	1.09146	#VALUE!	-4.19321	-7.76469	-2.93853	-6.17703	-9.71483
S-4	-6.22442	5.48213	-4.80026	-1.6643	-3.52796	-2.96989	-3.83689	-6.99842	-2.08162	-5.37521	-0.320712	-8.17591	5.22346	-3.42302	-1.46073	-1.87791	-2.36881	-4.24175	-3.9717	-1.82088	-5.7514	-1.44417	7.1389	-1.38313	5.51794	-2.36368	-7.07245	-4.13501	6.28797	-4.95935	-0.448214	1.45394	-8.98506	-1.86413	5.70463	-3.87397	-2.77381	-2.5475	1.89728	#VALUE!	2.36374	#VALUE!	-3.03085	-8.07889	-9.87088
S-5	-6.22093	-7.45032	-4.97652	-2.14442	-4.05457	-3.53239	-3.9082	-7.27719	-2.05424	-5.40299	-0.733931	-8.08543	5.29197	-3.39309	-1.46713	-1.69928	-2.60965	-4.85752	-4.58626	-2.09179	-6.36772	-0.759736	6.97793	-1.24029	5.68808	-2.83008	-8.24552	-2.7782	6.09822	-5.35916	-0.609649	1.05092	-8.95565	-1.17198	5.60565	-3.28721	-2.63432	-2.61089	0.731205	#VALUE!	6.19032	-11.7888	-2.34629	-6.54791	-8.24794
S-6	-7.1557	-7.09335	-5.89497	-2.37162	-4.36941	-4.15839	-4.68101	-8.89744	-2.74662	-6.11524	-0.475886	-8.75008	5.07658	-3.71616	-0.929712	-1.93792	-3.27372	-5.17475	-5.50524	-2.63065	-7.40032	-1.03478	6.91864	-0.690201	5.56668	-3.97779	-7.0289	-4.04967	5.81314	-6.39348	-0.421318	0.24645	-9.61975	-1.61958	2.50866	-2.83275	-2.93977	-2.57369	1.68958	-13.1688	5.45906	-9.08089	-2.65807	-5.73051	-7.86867
S-7	-6.30084	-6.76507	-5.25583	-1.92853	-4.21302	-4.02718	-4.52734	-7.77497	-2.27529	-5.2445	-1.73761	-8.89373	5.40652	-3.57092	-1.26187	-1.85028	-2.70597	-4.91503	-4.29518	-1.78115	-6.35751	-1.37255	7.24344	-1.5394	5.52415	-2.47002	-7.76533	-3.19405	6.03822	-5.36378	-0.374415	1.17688	-8.78485	-1.3273	6.58285	-3.52392	-2.69392	-2.45818	0.886689	#VALUE!	-5.81847	-7.06453	-2.42323	-9.27414	-7.9684
S-8	-5.91379	-14.2317	-6.28806	-2.30317	-3.97102	-3.77103	-4.93257	-8.41927	-2.86846	-6.11849	-0.465435	-8.0157	-4.69769	-4.06327	-2.80517	-2.90267	-3.53174	-5.40761	-4.83531	-2.28828	-6.6778	-1.6892	7.04356	-3.0867	5.93066	-3.41584	-7.78219	-5.47848	5.95118	-5.88403	-0.165006	0.682377	-9.64095	-2.04171	6.33605	-4.14528	-2.90556	-2.62555	1.55393	#VALUE!	-3.88799	-6.34468	-10.197	-8.26755	-9.36239
S-9	-5.68926	4.90657	-5.46154	-2.42272	-3.96515	-3.90488	-3.98156	-7.22715	-2.57854	-5.87076	-1.13641	-8.33097	0.61976	-3.43294	-11.5434	-2.01331	-2.76547	-4.71371	-4.81601	-2.37567	-6.71276	-1.67503	6.23435	-2.59889	5.76144	-3.21437	-8.48796	-3.37269	5.21495	-5.52441	-0.823949	0.828429	-9.8194	-1.6465	4.90002	-3.48028	-3.17652	-2.54098	0.577898	#VALUE!	-4.80497	-5.06916	-4.64062	-7.09394	-10.1087
T-1	-6.35578	6.19735	-5.47818	-2.34933	-4.02397	-4.11034	-3.90075	-7.26245	-2.09045	-5.56298	-2.02706	-9.315	5.83744	-3.53	-1.95572	-2.35329	-1.76427	-5.14324	-4.56848	-1.54324	-5.82104	-2.36643	6.63934	-3.23825	5.10892	-2.38376	-9.93334	-4.83516	6.05494	-4.90236	-1.56506	1.27031	-8.97364	-1.96321	5.65359	-3.67834	-3.43088	-2.82129	-0.551317	#VALUE!	#VALUE!	-8.03348	-3.22027	-10.4391	-9.04802
T-2	-6.18026	-4.7622	-5.28418	-1.86944	-3.30286	-3.53321	-3.72507	-6.74072	-2.01398	-5.45811	-0.574742	-8.60668	4.8823	-3.55112	-0.971835	-1.99155	-2.14222	-3.99308	-4.45873	-1.70376	-6.35563	-1.61421	6.77935	-2.31188	5.36739	-2.64897	-7.71607	-3.46385	5.43182	-4.87705	-0.668021	1.30943	-9.07537	-1.70625	5.4133	-3.20478	-2.5627	-2.32993	1.41108	#VALUE!	-3.55928	-5.53328	-7.05664	-10.1681	-10.6117
T-3	-5.90307	5.84297	-5.62861	-1.78703	-3.91408	-4.14985	-4.78785	-8.20779	-2.59927	-5.91279	-0.31669	-8.95111	5.15858	-3.97006	-1.23294	-2.41526	-2.58599	-4.45516	-4.85382	-2.00725	-6.71637	-1.10302	6.90686	-1.75269	5.83008	-2.97697	-6.91719	-2.76712	5.80446	-5.71275	0.264038	0.614702	-9.92439	-1.18242	5.88745	-3.51326	-2.22034	-2.2051	2.69812	#VALUE!	1.88909	-6.76343	-3.15967	-9.38343	-8.92671
T-4	-7.12966	-5.11177	-6.9232	-3.05478	-5.1812	-4.51191	-5.09095	-8.36275	-3.21713	-6.95964	-2.78701	-9.74722	-6.11776	-4.14773	-11.727	-2.54468	-3.24761	-6.61217	-5.86168	-3.24393	-8.02499	-2.21585	6.45501	-3.43049	4.07602	-3.87775	-8.31166	-6.82882	4.81463	-6.57291	-1.94638	-0.0653934	-11.0154	-2.89953	-0.0477124	-3.12281	-4.26209	-4.07756	-0.457527	-12.6931	-3.18522	-7.61848	-11.46	-10.1811	-8.98177
T-5	-7.96671	5.42481	-6.26246	-2.78842	-4.96508	-4.44811	-5.03257	-8.7133	-3.21875	-6.93601	-1.42026	-10.5818	4.8322	-4.07744	-1.77645	-2.49893	-3.3718	-5.4508	-5.62469	-3.17488	-7.50588	-1.49518	6.74571	-2.19902	4.89292	-3.74609	-7.65792	-4.37808	5.00021	-6.36895	-1.18009	-0.279337	-10.0468	-2.26808	4.76789	-3.16536	-3.06263	-3.08668	0.580153	-13.5485	-4.63243	#VALUE!	-3.55722	-7.15012	-8.63885
T-6	-6.2576	-5.89188	-6.53095	-3.07891	-4.70542	-4.66003	-4.8216	-10.2424	-3.4043	-6.79826	-0.424044	-9.48077	4.7527	-3.68728	-1.3559	-2.80635	-3.41774	-5.99478	-5.73113	-2.87459	-7.7935	-0.598223	7.3102	-0.918614	5.7325	-4.25019	-6.7446	-4.35886	5.5846	-6.39411	-0.0859535	-0.718804	-9.99975	-1.2677	5.02274	-3.23194	-2.47915	-2.51832	2.36945	#VALUE!	-2.73675	-11.8326	-3.02724	-5.65014	-8.49771
T-7	-5.97591	-5.1014	-5.96732	-2.27508	-4.21251	-4.07687	-4.63088	-8.98691	-2.74921	-5.68957	-0.37701	-8.87185	-1.3655	-4.22918	-9.20383	-2.54958	-2.57464	-5.57506	-4.77211	-2.3217	-6.62972	-1.60471	6.71834	-1.9066	5.99103	-3.22451	-6.63539	-4.88703	6.02782	-5.58993	-0.0816224	0.543929	-9.68961	-1.23344	5.39194	-3.67405	-2.39376	-2.44306	1.18898	#VALUE!	-4.44995	-9.31264	-3.6202	-7.92499	-7.89002
T-8	-6.40118	-7.66688	-7.25439	-2.9293	-4.60242	-4.11118	-4.91307	-8.09945	-2.97879	-6.41331	-0.963581	-10.5587	-1.19876	-4.20624	-2.48102	-2.73464	-3.5412	-5.83303	-5.84813	-2.55839	-6.80457	-2.31869	7.22776	-3.17619	5.01947	-4.12514	-8.98959	-4.56124	5.91394	-5.91013	-0.8317	0.0315762	-10.1359	-1.90083	5.95547	-3.36058	-4.01168	-3.24457	0.023945	#VALUE!	#VALUE!	-7.6148	-18.4418	-6.73679	-8.7283
T-9	-6.90276	4.50322	-8.36752	-3.92884	-5.69766	-4.91236	-6.0062	-9.57903	-4.35917	-7.79383	-8.84493	-10.9707	-12.8199	-4.38641	-9.33878	-3.76288	-3.88796	-7.51286	-6.1993	-3.69495	-7.84155	-2.64621	6.64664	-3.80014	4.48665	-4.91411	-9.70777	-6.87056	4.9298	-7.51746	-2.15997	-0.922793	-10.8035	-3.33262	-2.66281	-3.63455	-6.13043	-3.25957	-1.23905	#VALUE!	-11.5961	#VALUE!	#VALUE!	-7.62181	-8.55775
U-1	-7.14186	4.68067	-6.95433	-2.92104	-4.88655	-4.6742	-5.426	-9.34266	-3.05227	-6.6968	-2.17723	-9.41187	5.19329	-4.1599	-2.99684	-3.05685	-3.00568	-5.46843	-5.86101	-2.2769	-6.85603	-2.80332	5.60185	-4.05736	2.98287	-3.37285	-11.3077	-5.96327	5.75666	-5.68287	-2.85291	0.470422	-11.2678	-1.96936	4.78021	-3.12508	-2.66842	-3.16608	-1.80045	#VALUE!	-15.4986	#VALUE!	-9.53119	#VALUE!	-8.84219
U-2	-6.42561	-5.43504	-7.30946	-2.69288	-4.4098	-4.24835	-5.99757	-9.92532	-3.55723	-7.44188	-1.44871	-9.52241	4.77666	-4.15247	-2.19826	-2.86761	-3.77199	-5.38967	-5.51024	-3.04371	-7.64881	-2.52666	5.91276	-4.02294	4.74714	-3.7496	-7.71516	-4.42428	4.8693	-6.8393	-1.60048	-0.43463	-11.2096	-1.93999	5.04774	-3.31332	-3.4463	-2.43296	0.711266	-13.04	-1.9349	#VALUE!	-3.87808	-8.80922	-11.4626
U-3	-6.56936	-8.99862	-7.66465	-3.09509	-4.81543	-4.43821	-5.62708	-8.59697	-4.4115	-7.06215	-2.65673	-9.637	3.58455	-4.17732	-2.9716	-3.10608	-4.48142	-5.84698	-5.91231	-3.576	-7.95707	-2.57302	5.43324	-3.19505	4.08216	-4.22356	-7.83601	-4.14115	4.11313	-7.24085	-1.68611	-0.832284	-12.1754	-2.58499	3.9883	-3.46604	-3.86752	-3.18532	-0.505405	#VALUE!	-2.46879	-10.2589	-4.7529	-8.06641	#VALUE!
U-4	-5.41223	5.24324	-5.96787	-1.47085	-3.45223	-2.94688	-4.05478	-7.15354	-2.6213	-6.02445	-1.08448	-7.48053	4.99366	-3.35152	-1.53385	-1.96512	-2.82451	-4.61758	-3.88907	-1.75589	-5.84605	-1.569	6.8287	-2.79289	5.52153	-2.07085	-6.86212	-4.12608	5.41695	-5.18326	-0.381755	1.27832	-9.72288	-2.00794	5.61543	-3.49102	-2.17702	-2.80741	1.09264	#VALUE!	-0.627585	#VALUE!	-4.04924	-7.18995	-8.61111
U-5	-5.6761	5.29347	-5.80003	-1.66587	-4.30903	-3.19291	-4.50008	-8.36923	-2.99233	-6.89663	-0.568192	-8.53204	5.10897	-3.77545	-1.24025	-2.41899	-3.16018	-5.1547	-4.69739	-1.95371	-6.01445	-1.3673	6.89162	-2.77214	5.3405	-2.70921	-6.87118	-3.99489	5.31628	-5.99471	-0.352682	0.81295	-9.89867	-1.45156	5.86396	-3.59207	-2.80448	-2.60598	1.42811	#VALUE!	-1.05481	#VALUE!	-2.9554	-8.0028	-7.76674
U-6	-5.96192	-6.14951	-7.9585	-2.48813	-5.00761	-4.19731	-5.61824	-9.25712	-4.28664	-7.22456	-0.872789	-8.76726	5.05496	-3.90711	-1.69868	-3.02961	-3.61937	-5.89804	-4.73278	-2.69464	-7.30214	-1.7075	6.81507	-2.65312	5.24853	-3.44033	-6.93115	-4.69669	5.00893	-6.79456	-0.430698	-0.0872323	-11.2817	-1.96921	5.37699	-3.35647	-3.32955	-2.83516	1.14525	#VALUE!	-9.25909	-8.04361	-8.13589	-10.7835	-9.20321
U-7	-5.93797	6.35873	-6.80177	-2.73239	-5.10291	-4.03594	-4.63011	-7.44874	-3.48362	-6.44343	-0.53331	-8.34708	-0.467181	-3.67489	-0.956932	-2.85705	-3.53562	-5.79346	-5.05118	-2.32673	-6.36753	-1.09252	7.35646	-2.36748	0.619228	-3.58931	-7.07749	-4.94403	5.76883	-6.05723	-0.1299	0.414098	-10.5072	-1.50472	6.23029	-3.7469	-4.06862	-2.35396	0.907388	-12.3877	#VALUE!	-8.88275	-6.19131	-7.64723	-9.42916
U-8	-5.7118	-6.7991	-6.57978	-2.21413	-4.71667	-3.80654	-5.11251	-8.91287	-3.77929	-7.26387	-0.282806	-8.94679	5.35508	-3.52483	-0.884101	-2.78292	-3.72618	-5.3978	-5.34041	-2.88569	-7.00395	-0.882471	7.49968	-3.20563	5.72503	-3.5111	-6.98172	-4.89372	5.54489	-6.9656	-0.385548	-0.264658	-10.5274	-1.67351	3.38968	-3.50703	-3.39662	-2.90045	1.65015	#VALUE!	0.328232	#VALUE!	-9.15029	-9.55763	-9.0187
U-9	-6.77511	5.69988	-8.52296	-3.09616	-5.08479	-4.16818	-5.10499	-9.17176	-3.77074	-7.3638	-2.50509	-10.3047	5.69188	-3.81895	-6.48492	-3.25712	-3.65416	-5.83368	-5.85366	-2.91955	-6.7659	-1.96934	7.27841	-4.02235	-0.0431671	-4.21143	-9.21772	-6.66177	6.43546	-6.13246	-1.44928	-0.0600621	-10.8161	-1.93382	6.07839	-3.05647	-5.42444	-3.12862	-0.523305	#VALUE!	-2.70792	#VALUE!	#VALUE!	-9.05181	-8.80763
V-1	-6.6509	4.19698	-5.98452	-2.74896	-4.16516	-3.77413	-4.48657	-8.71046	-2.63477	-6.58285	-3.76358	-8.38848	4.16565	-4.01545	-16.1777	-2.79215	-2.40881	-4.85397	-5.64357	-1.96103	-6.05361	-3.45545	5.57732	-4.53945	3.28044	-3.44023	-12.2505	-5.12829	5.07744	-5.12801	-2.59313	0.940213	-9.94424	-2.99923	4.49602	-3.12456	-4.06181	-2.80337	-1.79605	#VALUE!	-1.31078	-13.3794	-4.77118	-7.9098	-9.98913
V-2	-6.04925	4.0978	-6.03025	-2.51145	-4.04813	-3.46918	-4.65063	-7.91588	-2.78786	-6.48733	-2.8127	-8.68799	3.9322	-3.77639	-3.25301	-2.61583	-2.59464	-4.77006	-4.98164	-2.26887	-6.1911	-3.1744	5.58933	-4.71438	3.90416	-3.13769	-8.46006	-4.72992	4.63325	-5.26186	-2.11559	0.755765	-10.0539	-2.97468	4.67138	-3.09794	-3.45153	-2.93886	-1.14536	#VALUE!	-8.64196	-11.6284	-4.36095	-7.64646	-9.46685
V-3	-5.4483	-7.17738	-5.83728	-1.91644	-3.42811	-2.66753	-4.15318	-7.63945	-2.92221	-6.28383	-1.61427	-7.77309	4.75508	-3.81396	-2.19555	-2.29987	-2.80429	-3.92181	-4.88606	-2.14032	-5.90292	-1.59505	5.88819	-2.35957	5.34702	-2.95935	-7.01602	-2.42248	5.05875	-5.21912	-0.873204	0.758128	-7.98165	-1.59084	5.11864	-3.13654	-2.11747	-2.08248	0.821337	#VALUE!	2.52335	#VALUE!	-3.85989	-7.10437	-10.789
V-4	-6.30473	5.17538	-5.89639	-2.1445	-3.91897	-3.40337	-4.6883	-7.80486	-2.72439	-6.17883	-1.61421	-8.29731	4.41841	-4.01882	-2.18112	-2.36416	-2.7978	-4.71184	-4.86754	-2.12935	-6.03666	-2.40393	6.03967	-2.96529	4.33027	-3.15818	-7.2098	-3.53815	4.83469	-5.2656	-0.827355	1.02554	-9.49143	-2.26306	5.19682	-3.20854	-3.04826	-2.58981	-0.088991	#VALUE!	-2.87717	-10.9506	-3.74812	-6.82558	-9.54623
V-5	-7.06502	4.14574	-7.88429	-2.68737	-4.46952	-4.06239	-5.85585	-9.97497	-3.89777	-7.31604	-2.70331	-9.68794	4.69172	-4.27706	-11.1039	-2.89347	-3.64334	-5.35451	-6.05682	-3.17413	-7.43043	-2.14785	6.47993	-2.64784	4.11507	-4.05983	-7.48427	-4.47309	5.00287	-6.46682	-1.36773	-0.239653	-10.5733	-2.92992	1.999	-3.14605	-3.77393	-3.0563	-0.245581	-14.7995	-8.56544	-9.68132	-3.99999	-8.59046	-9.77214
V-6	-6.68158	6.24073	-6.81499	-2.55256	-4.35806	-4.39683	-5.41043	-8.66538	-3.28721	-6.61443	-0.957995	-10.5715	5.53528	-4.08499	-2.94939	-2.8294	-3.10703	-5.40615	-5.36931	-2.67927	-6.7275	-2.01232	6.3228	-2.93753	5.08482	-3.38456	-7.76963	-4.67255	5.94125	-6.02751	-0.913287	0.239838	-10.3326	-1.55936	5.62357	-3.29104	-3.11081	-2.5037	0.578022	#VALUE!	-8.31633	-8.78864	-8.1957	-11.1047	-8.49269
V-7	-6.28729	5.04665	-5.97602	-2.01949	-4.1078	-3.63293	-4.60279	-8.23175	-2.56373	-5.88644	-1.87469	-8.76313	1.93248	-3.8407	-3.12067	-2.30548	-2.42806	-4.8665	-5.07952	-1.76343	-5.92062	-2.17306	6.66173	-3.0154	4.56028	-3.01049	-8.67199	-5.07816	5.77132	-5.15625	-1.34664	1.42812	-9.57735	-2.94629	5.15763	-3.7793	-2.76885	-2.74576	-0.00131252	#VALUE!	-17.6063	-10.3185	-6.4833	-8.81285	-9.52789
V-8	-6.12022	6.87329	-6.22244	-1.74237	-3.64654	-3.50013	-4.71821	-7.9012	-2.73151	-6.64792	-0.657224	-8.8909	1.12163	-3.77685	-0.764998	-2.07424	-2.88773	-4.7694	-5.16104	-1.79378	-5.94204	-0.428858	7.69617	-1.88373	6.10279	-3.36609	-7.39616	-3.41678	6.93507	-5.1401	0.0645679	0.889478	-9.57276	-0.822745	6.33704	-2.92027	-2.93994	-2.30476	2.47353	#VALUE!	0.520374	#VALUE!	-11.3798	-13.7216	-8.89256
V-9	-6.97686	4.25294	-7.46293	-3.11394	-5.09077	-4.53308	-6.07597	-9.51445	-3.80735	-7.46478	-2.49197	-9.58051	4.09627	-4.54184	-8.86843	-3.15425	-3.58221	-6.2562	-6.15362	-3.26883	-7.4717	-3.01573	6.04179	-3.91261	3.96248	-4.2017	-10.0526	-6.49342	4.72164	-6.59156	-2.26395	-0.193483	-11.0326	-3.35676	4.87744	-3.12431	-3.76798	-3.15722	-0.921765	#VALUE!	-2.15107	-9.55826	-8.1155	-10.3997	-9.35616
W-1	-7.38169	5.45568	-5.32791	-2.12533	-3.01765	-3.61223	-3.46448	-7.07889	-1.67892	-4.77219	-2.75224	-7.22768	6.12	-3.43913	-11.3983	-2.17179	-1.69396	-4.51861	-4.40726	-0.889902	-5.08373	-2.35175	6.39186	-3.76949	3.61511	-2.37738	-12.5781	-5.31538	6.48267	-4.62713	-1.69709	1.47354	-9.45441	-1.96801	5.40883	-4.02351	-3.95946	-2.85271	-0.929115	#VALUE!	0.227121	-12.0293	-3.31897	#VALUE!	-9.12286
W-2	-6.38353	5.4489	-5.44232	-1.90432	-3.22041	-2.76384	-3.32438	-6.88376	-1.84277	-5.27389	-1.79576	-7.22263	6.24601	-3.44954	-1.28509	-1.99386	-1.96104	-3.9795	-4.48491	-1.01191	-5.16249	-1.90086	6.97502	-2.8163	5.41133	-2.5929	-7.97358	-3.53741	6.5814	-4.27681	-0.961068	1.17861	-8.81975	-1.67959	5.91712	-4.03378	-2.69805	-2.58551	0.217284	-12.6005	-2.0819	-11.19	-2.76166	-7.29989	-9.10382
W-3	-6.05526	6.05484	-6.37473	-1.97645	-3.92855	-3.39331	-4.21479	-7.2771	-2.53682	-6.02813	-0.628156	-8.54245	5.76012	-3.41673	-1.47903	-2.23667	-2.87424	-4.10961	-5.14048	-1.85114	-6.0824	-1.18234	6.99305	-1.97226	5.79008	-3.20855	-6.92379	-3.3197	6.81459	-5.37188	-0.404724	0.255189	-9.06832	-1.16967	5.85656	-3.74944	-2.86996	-2.37522	0.980314	#VALUE!	-1.60161	#VALUE!	-3.00915	-6.40138	-7.40788
W-4	-6.11038	5.6978	-5.88289	-2.07439	-4.19807	-3.19397	-4.23479	-7.79959	-2.51768	-5.9267	-0.9322	-7.83344	5.45145	-3.64884	-1.52283	-2.15149	-2.72765	-4.41299	-4.80365	-1.61123	-5.65278	-1.59451	7.2081	-2.03671	5.3869	-2.63523	-8.1047	-3.47219	6.1479	-5.09181	-0.495081	0.643571	-9.07785	-1.95288	5.89848	-3.73861	-2.61756	-2.57862	0.762751	-13.5925	-8.66278	#VALUE!	-3.20646	-7.17604	-8.4856
W-5	-7.3427	5.10232	-7.64471	-2.76154	-4.70609	-3.83697	-5.18781	-9.16577	-3.48598	-6.53686	-1.50555	-9.43805	5.01251	-4.10236	-1.99683	-2.72266	-3.45048	-5.6077	-5.68319	-2.42114	-7.04598	-1.45959	6.96663	-1.6074	4.65449	-3.73997	-8.15644	-4.11307	5.72523	-6.35547	-1.11225	-0.262912	-9.89968	-2.58167	2.81644	-3.54064	-3.08687	-2.95648	0.852355	#VALUE!	0.000445492	-8.68761	-3.11474	-7.25567	-8.44449
W-6	-6.57896	6.69483	-6.01375	-2.7921	-4.6256	-4.15059	-4.11436	-8.0994	-3.09437	-5.93728	-0.887046	-8.43157	6.03459	-3.77841	-9.70479	-2.80549	-2.81464	-5.17407	-5.29921	-1.92316	-6.28282	-1.28649	7.37738	-2.09816	6.06656	-3.27418	-8.33777	-5.44324	6.83326	-5.53532	-0.653462	0.281753	-10.1266	-1.10372	6.20402	-3.7801	-3.3472	-2.21377	1.33843	#VALUE!	-10.8668	#VALUE!	-4.09038	-10.1022	-7.45771
W-7	-7.16208	5.39084	-7.43297	-3.04663	-4.16984	-4.23244	-4.98636	-10.3359	-3.09174	-6.59973	-1.96967	-9.74346	-2.33785	-3.74145	-16.8916	-3.07839	-3.38061	-5.50321	-5.99201	-2.10626	-6.90972	-1.86542	6.66592	-2.86237	5.27547	-4.27217	-9.95468	-3.99005	6.57202	-5.86914	-1.81805	-0.312789	-9.96965	-1.66395	5.59512	-3.65189	-3.98358	-2.83406	0.422948	#VALUE!	-11.4936	-8.90623	-6.70496	-12.4131	-8.94821
W-8	-6.05999	6.64205	-6.2692	-2.35523	-4.55853	-3.92419	-4.94959	-8.10287	-3.46866	-6.45054	0.560333	-10.1769	5.36891	-3.57392	-0.644917	-2.50504	-3.36924	-5.24528	-5.52491	-2.38932	-6.93499	-0.614454	7.12714	-1.22839	6.50515	-3.93339	-7.45016	-2.92993	6.4497	-5.9719	0.582293	-0.388577	-10.2664	-0.369716	5.99348	-3.87187	-2.02847	-2.39777	2.7797	#VALUE!	2.69526	-2.29715	-3.02981	-8.19061	-7.41599
W-9	-7.23174	4.27054	-7.96116	-3.02766	-5.01501	-4.47518	-5.77312	-9.33929	-3.5937	-7.14568	-3.51251	-10.9412	-0.511438	-4.10309	-15.501	-3.13043	-3.23348	-6.15311	-6.09861	-2.65227	-7.40068	-2.95727	6.16113	-4.56623	4.05092	-3.65056	-11.362	-6.74391	5.28735	-6.35493	-2.24663	-0.358434	-10.76	-3.21576	4.41341	-3.72463	-4.4726	-3.23835	-0.947534	#VALUE!	-1.83395	-11.6487	-8.74421	-10.3595	-9.46016
X-1	-7.07059	3.41497	-7.92522	-3.47854	-5.01507	-4.99538	-5.09462	-9.06649	-3.76649	-7.20021	-4.11347	-9.86664	4.322	-3.85654	-12.9581	-3.62754	-3.77448	-5.99898	-6.37193	-2.67382	-7.53774	-3.83319	4.86799	-5.02087	2.9036	-4.46333	-11.4374	-5.3384	4.64025	-6.18051	-2.59129	-0.497017	-10.7139	-3.19352	3.60993	-3.41155	-5.18206	-2.66509	-1.9512	#VALUE!	3.96534	-14.4121	-5.29397	-11.7884	-9.86825
X-2	-6.479	3.7728	-6.86772	-2.81632	-4.34349	-3.58546	-4.70465	-9.03477	-3.06359	-6.90101	-2.34049	-9.30855	4.12211	-3.85417	-3.29557	-2.89744	-3.49559	-5.25742	-5.49539	-2.20094	-6.43012	-2.92464	5.63118	-3.87063	3.32295	-3.87922	-8.34045	-4.2463	5.06754	-5.5811	-2.16538	0.2951	-10.0306	-3.19357	1.43359	-3.38653	-4.26233	-2.97667	-0.79665	#VALUE!	-9.64783	#VALUE!	-4.37429	-7.96998	-9.10208
X-3	-7.24706	4.99677	-6.70869	-3.03572	-4.48405	-3.9852	-4.90447	-8.97324	-3.30883	-6.853	-2.10586	-9.10379	5.22532	-3.93179	-2.67065	-3.13307	-3.38665	-5.51895	-5.72905	-2.31356	-6.47375	-2.13737	6.27811	-2.78866	4.53864	-4.02004	-8.68095	-4.62456	5.46446	-5.75473	-1.62507	-0.150512	-9.52413	-2.34785	4.75869	-3.40655	-4.36095	-2.74759	0.316608	#VALUE!	0.851274	#VALUE!	-3.94837	-8.60868	#VALUE!
X-4	-6.7249	5.0622	-6.69638	-2.73504	-4.01441	-3.90241	-3.97076	-8.38356	-2.73001	-6.09577	-1.38502	-8.17062	5.37541	-3.75319	-8.82773	-2.93341	-3.20003	-5.15593	-5.32061	-1.82494	-6.40464	-1.8903	6.316	-2.4047	4.65852	-3.75564	-8.82445	-4.8003	5.81432	-5.29989	-1.36259	0.528185	-9.32265	-1.95316	5.4373	-3.65427	-3.83345	-2.84428	0.475772	#VALUE!	-2.14752	#VALUE!	-4.16268	-11.1211	-10.105
X-5	-7.05767	4.57967	-7.89447	-3.35306	-4.60853	-4.82355	-5.15202	-10.5947	-4.01975	-6.97419	-1.89978	-10.2973	-0.56676	-4.06347	-2.29244	-3.5604	-3.87998	-6.25854	-5.59288	-2.7397	-7.35092	-2.08804	6.30614	-2.47669	4.67729	-4.65973	-8.79546	-5.42298	5.25327	-6.38837	-1.46759	-0.656515	-9.26679	-2.25948	4.70818	-3.27474	-4.28229	-3.08085	0.414334	#VALUE!	-3.13219	-10.1182	-3.74096	#VALUE!	-8.2315
X-6	-6.74913	4.79964	-7.71568	-3.2246	-4.81522	-4.82494	-5.00551	-8.52775	-3.76025	-6.43515	-2.01646	-9.21481	5.99885	-4.04955	-3.36927	-3.52176	-3.90352	-5.77518	-5.9114	-2.35524	-7.01194	-2.42198	6.12138	-3.76588	4.70397	-4.13021	-10.7951	-6.45957	6.38902	-6.31496	-1.84332	-0.132679	-9.93935	-1.96589	5.14741	-3.51832	-4.1334	-2.65335	-0.197523	#VALUE!	#VALUE!	#VALUE!	-4.13826	-10.1248	-10.1209
X-7	-6.42135	4.66258	-6.75273	-3.05975	-4.3168	-4.54088	-4.54044	-8.53376	-3.12856	-6.32788	-1.77218	-9.90188	5.26238	-3.75057	-13.4475	-3.24624	-3.31565	-5.51673	-5.4095	-2.16103	-6.48115	-2.7301	5.94816	-4.48863	4.30538	-3.88264	-10.7593	-5.2952	5.07803	-5.26748	-2.05591	0.225484	-9.54819	-2.62371	5.00158	-3.44148	-3.89684	-2.69582	-0.745011	-16.6551	#VALUE!	#VALUE!	-13.7279	-8.94839	-11.2754
X-8	-5.81118	-5.8356	-8.51195	-2.99735	-4.63196	-4.30197	-5.23449	-8.19339	-4.00101	-6.66204	0.356324	-9.84994	6.27819	-3.69333	-1.06815	-3.41236	-4.15648	-5.26662	-5.70514	-2.19215	-7.25717	-0.833811	6.99247	-2.10038	6.18708	-4.2216	-7.34912	-5.1607	6.15339	-6.3261	0.583069	-0.396436	-9.58703	-1.06652	6.64082	-3.94348	-2.80145	-2.06486	2.26858	#VALUE!	-3.02673	#VALUE!	#VALUE!	-7.90187	-10.001
X-9	-6.06892	5.46504	-8.21529	-2.98449	-4.69619	-4.26676	-4.70344	-9.41055	-3.0579	-6.89043	-1.33259	-11.583	6.1364	-3.7133	-1.06837	-3.20145	-3.55925	-5.36652	-5.77107	-1.83098	-5.91589	-1.3212	7.55276	-2.35896	4.87492	-3.96693	-10.7168	-5.41035	6.63942	-5.65922	-0.673909	0.561377	-9.09231	-1.32331	3.8257	-3.46057	-5.14311	-3.20142	0.455326	#VALUE!	#VALUE!	#VALUE!	#VALUE!	-11.3094	#VALUE!
